# Supplementary material for: CRANAD-1 as a cyanide sensor in aqueous media: a theoretical study
Source: Royal Society of Chemistry journal article supplement (doi:10.1039/c6ra19045f), 2016-01-01
Supplement: c6ra19045f1.pdf [file c6ra19045f1.pdf]

Electronic Supplementary Information

**CRANAD-1 as a cyanide sensor in aqueous media: A theoretical study**

D. R. Sherin<sup>a,\*</sup>, T. K. Manojkumar<sup>a</sup> and K. N. Rajasekharan<sup>b</sup>

<sup>a</sup>Department of Computational Science, Indian Institute of Information Technology and Management-Kerala, Trivandrum-695581, Kerala, india

<sup>b</sup>Department of Chemistry, University of Kerala, Kariavattom, Trivandrum-695581, Kerala, India

email: sherin.res16@iitmk.ac.in

## Optimized geometric parameters for **1** in B3LYP/SDD

Standard orientation:

| Center<br>Number | Atomic<br>Number | Atomic<br>Type | Coordinates (Angstroms) |           |           |
|------------------|------------------|----------------|-------------------------|-----------|-----------|
|                  |                  |                | X                       | Y         | Z         |
| 1                | 6                | 0              | -7.127300               | -0.643216 | -0.000003 |
| 2                | 6                | 0              | -5.931330               | 0.076200  | -0.000099 |
| 3                | 6                | 0              | -7.103159               | -2.064309 | 0.000306  |
| 4                | 1                | 0              | -5.940458               | 1.161811  | -0.000330 |
| 5                | 6                | 0              | -4.680835               | -0.608524 | 0.000097  |
| 6                | 6                | 0              | -5.878364               | -2.750197 | 0.000511  |
| 7                | 1                | 0              | -5.883830               | -3.835502 | 0.000752  |
| 8                | 6                | 0              | -4.677005               | -2.029421 | 0.000407  |
| 9                | 1                | 0              | -3.739683               | -2.576025 | 0.000584  |
| 10               | 6                | 0              | -3.462906               | 0.189819  | -0.000015 |
| 11               | 1                | 0              | -3.596207               | 1.271051  | -0.000133 |
| 12               | 6                | 0              | -2.170998               | -0.272726 | 0.000009  |
| 13               | 1                | 0              | -1.943432               | -1.334107 | 0.000091  |
| 14               | 6                | 0              | -1.031579               | 0.610922  | -0.000074 |
| 15               | 8                | 0              | -1.271993               | 1.944940  | -0.000165 |
| 16               | 6                | 0              | 0.290129                | 0.131089  | -0.000041 |
| 17               | 1                | 0              | 0.453917                | -0.937120 | 0.000042  |
| 18               | 6                | 0              | 1.381203                | 1.025084  | -0.000090 |
| 19               | 8                | 0              | 1.146924                | 2.360583  | -0.000093 |
| 20               | 6                | 0              | 2.781135                | 0.674300  | -0.000086 |
| 21               | 1                | 0              | 3.451839                | 1.528782  | 0.000026  |
| 22               | 6                | 0              | 3.265765                | -0.610343 | -0.000243 |
| 23               | 1                | 0              | 2.555039                | -1.435620 | -0.000406 |
| 24               | 6                | 0              | 4.662582                | -1.017331 | -0.000227 |
| 25               | 6                | 0              | 5.742805                | -0.084297 | 0.000093  |
| 26               | 6                | 0              | 4.955294                | -2.406581 | -0.000530 |
| 27               | 1                | 0              | 5.545365                | 0.981429  | 0.000341  |
| 28               | 1                | 0              | 4.138906                | -3.123832 | -0.000765 |
| 29               | 6                | 0              | 7.056395                | -0.546930 | 0.000093  |
| 30               | 6                | 0              | 6.279425                | -2.871052 | -0.000549 |
| 31               | 1                | 0              | 6.505343                | -3.932259 | -0.000787 |
| 32               | 6                | 0              | 7.331241                | -1.946514 | -0.000239 |
| 33               | 8                | 0              | 8.213564                | 0.231025  | 0.000375  |
| 34               | 6                | 0              | 8.091977                | 1.692692  | 0.000963  |
| 35               | 1                | 0              | 7.566626                | 2.034160  | -0.898629 |
| 36               | 1                | 0              | 7.566475                | 2.033420  | 0.900748  |
| 37               | 1                | 0              | 9.115710                | 2.068248  | 0.001199  |
| 38               | 8                | 0              | 8.644153                | -2.385040 | -0.000233 |
| 39               | 1                | 0              | 9.260398                | -1.616526 | 0.000038  |
| 40               | 8                | 0              | -8.419307               | -0.115410 | -0.000188 |
| 41               | 6                | 0              | -8.593932               | 1.340647  | -0.000487 |
| 42               | 1                | 0              | -8.147957               | 1.781583  | 0.898760  |
| 43               | 1                | 0              | -8.147898               | 1.781222  | -0.899881 |
| 44               | 1                | 0              | -9.672334               | 1.503000  | -0.000555 |
| 45               | 8                | 0              | -8.293875               | -2.773495 | 0.000416  |
| 46               | 1                | 0              | -9.058909               | -2.153342 | 0.000252  |
| 47               | 5                | 0              | -0.206718               | 2.975459  | -0.000076 |
| 48               | 9                | 0              | -0.346335               | 3.804823  | -1.165328 |
| 49               | 9                | 0              | -0.346366               | 3.804691  | 1.165256  |

## Optimized geometric parameters for **1a** in B3LYP/SDD

Standard orientation:

| Center<br>Number | Atomic<br>Number | Atomic<br>Type | Coordinates (Angstroms) |           |           |
|------------------|------------------|----------------|-------------------------|-----------|-----------|
|                  |                  |                | X                       | Y         | Z         |
| 1                | 6                | 0              | -6.534147               | -0.233411 | -0.024710 |
| 2                | 6                | 0              | -5.310895               | 0.412595  | -0.031260 |
| 3                | 6                | 0              | -6.627440               | -1.695373 | 0.017498  |
| 4                | 1                | 0              | -5.258674               | 1.498455  | -0.061774 |
| 5                | 6                | 0              | -4.069400               | -0.318991 | 0.002411  |
| 6                | 6                | 0              | -5.366300               | -2.406845 | 0.050733  |
| 7                | 1                | 0              | -5.430145               | -3.491332 | 0.081817  |
| 8                | 6                | 0              | -4.148594               | -1.752445 | 0.043333  |
| 9                | 1                | 0              | -3.231570               | -2.336278 | 0.069442  |
| 10               | 6                | 0              | -2.841997               | 0.397480  | -0.005291 |
| 11               | 1                | 0              | -2.902614               | 1.485872  | -0.037903 |
| 12               | 6                | 0              | -1.544165               | -0.120880 | 0.025251  |
| 13               | 1                | 0              | -1.369001               | -1.192476 | 0.060519  |
| 14               | 6                | 0              | -0.392426               | 0.702704  | 0.012361  |
| 15               | 8                | 0              | -0.544406               | 2.043379  | -0.053017 |
| 16               | 6                | 0              | 0.932263                | 0.158289  | 0.048012  |
| 17               | 1                | 0              | 1.049797                | -0.916450 | 0.099716  |
| 18               | 6                | 0              | 2.041590                | 0.993850  | -0.003487 |
| 19               | 8                | 0              | 1.902465                | 2.339632  | -0.060200 |
| 20               | 6                | 0              | 3.441286                | 0.566920  | -0.013184 |
| 21               | 1                | 0              | 4.130939                | 1.407907  | -0.042013 |
| 22               | 6                | 0              | 3.898376                | -0.716236 | 0.008404  |
| 23               | 1                | 0              | 3.172815                | -1.529503 | 0.032631  |
| 24               | 6                | 0              | 5.302194                | -1.145321 | 0.002406  |
| 25               | 6                | 0              | 6.386307                | -0.223088 | -0.025573 |
| 26               | 6                | 0              | 5.599486                | -2.529299 | 0.025287  |
| 27               | 1                | 0              | 6.185428                | 0.842358  | -0.042461 |
| 28               | 1                | 0              | 4.782539                | -3.246830 | 0.046938  |
| 29               | 6                | 0              | 7.700789                | -0.689207 | -0.030400 |
| 30               | 6                | 0              | 6.925842                | -2.997020 | 0.020683  |
| 31               | 1                | 0              | 7.153803                | -4.058091 | 0.038315  |
| 32               | 6                | 0              | 7.981268                | -2.081012 | -0.007193 |
| 33               | 8                | 0              | 8.861077                | 0.104568  | -0.056998 |
| 34               | 6                | 0              | 8.713481                | 1.553661  | -0.085496 |
| 35               | 1                | 0              | 8.171545                | 1.873647  | -0.985309 |
| 36               | 1                | 0              | 8.188845                | 1.910922  | 0.810496  |
| 37               | 1                | 0              | 9.729717                | 1.952584  | -0.103517 |
| 38               | 8                | 0              | 9.301651                | -2.524167 | -0.012158 |
| 39               | 1                | 0              | 9.904377                | -1.747813 | -0.032877 |
| 40               | 8                | 0              | -7.779867               | 0.394596  | -0.055939 |
| 41               | 6                | 0              | -7.824771               | 1.843799  | -0.100969 |
| 42               | 1                | 0              | -7.351260               | 2.286715  | 0.788188  |
| 43               | 1                | 0              | -7.331707               | 2.231345  | -1.005229 |
| 44               | 1                | 0              | -8.886476               | 2.098434  | -0.120326 |
| 45               | 8                | 0              | -7.759848               | -2.321721 | 0.024778  |
| 46               | 1                | 0              | -9.217020               | -1.853219 | -0.003596 |
| 47               | 5                | 0              | 0.572694                | 3.037657  | 0.046955  |
| 48               | 9                | 0              | 0.460058                | 3.975406  | -1.014514 |
| 49               | 9                | 0              | 0.503597                | 3.697578  | 1.312530  |
| 50               | 7                | 0              | -10.264096              | -1.646637 | -0.020293 |
| 51               | 6                | 0              | -11.434017              | -1.424375 | -0.038757 |

## Optimized geometric parameters for **1b** in B3LYP/SDD

Standard orientation:

| Center<br>Number | Atomic<br>Number | Atomic<br>Type | Coordinates (Angstroms) |           |           |
|------------------|------------------|----------------|-------------------------|-----------|-----------|
|                  |                  |                | X                       | Y         | Z         |
| 1                | 6                | 0              | -6.927352               | -0.794403 | -0.000328 |
| 2                | 6                | 0              | -5.863180               | 0.111108  | -0.000391 |
| 3                | 6                | 0              | -6.682232               | -2.188016 | -0.000071 |
| 4                | 1                | 0              | -6.043115               | 1.182855  | -0.000587 |
| 5                | 6                | 0              | -4.521915               | -0.359610 | -0.000191 |
| 6                | 6                | 0              | -5.362743               | -2.663205 | 0.000132  |
| 7                | 1                | 0              | -5.194089               | -3.735549 | 0.000342  |
| 8                | 6                | 0              | -4.287036               | -1.762443 | 0.000071  |
| 9                | 1                | 0              | -3.271015               | -2.151905 | 0.000277  |
| 10               | 6                | 0              | -3.432222               | 0.621212  | -0.000255 |
| 11               | 1                | 0              | -3.705541               | 1.677015  | -0.000484 |
| 12               | 6                | 0              | -2.109518               | 0.294660  | -0.000055 |
| 13               | 1                | 0              | -1.776824               | -0.744428 | 0.000165  |
| 14               | 6                | 0              | -1.019286               | 1.248234  | -0.000053 |
| 15               | 8                | 0              | -1.261944               | 2.572460  | -0.000743 |
| 16               | 6                | 0              | 0.287223                | 0.747802  | 0.000480  |
| 17               | 1                | 0              | 0.412892                | -0.326233 | 0.000997  |
| 18               | 6                | 0              | 1.388407                | 1.619356  | -0.000040 |
| 19               | 8                | 0              | 1.196825                | 2.949739  | -0.000572 |
| 20               | 6                | 0              | 2.766892                | 1.159034  | -0.000095 |
| 21               | 1                | 0              | 3.518531                | 1.945563  | -0.000262 |
| 22               | 6                | 0              | 3.081716                | -0.174364 | 0.000045  |
| 23               | 1                | 0              | 2.276778                | -0.914954 | 0.000205  |
| 24               | 6                | 0              | 4.408972                | -0.782918 | 0.000046  |
| 25               | 6                | 0              | 5.620810                | -0.036241 | -0.000221 |
| 26               | 6                | 0              | 4.468335                | -2.201087 | 0.000338  |
| 27               | 1                | 0              | 5.584502                | 1.048388  | -0.000449 |
| 28               | 1                | 0              | 3.531124                | -2.756900 | 0.000512  |
| 29               | 6                | 0              | 6.842706                | -0.706938 | -0.000195 |
| 30               | 6                | 0              | 5.705656                | -2.867411 | 0.000400  |
| 31               | 1                | 0              | 5.765535                | -3.951253 | 0.000622  |
| 32               | 6                | 0              | 6.892636                | -2.126511 | 0.000132  |
| 33               | 8                | 0              | 8.121210                | -0.110697 | -0.000377 |
| 34               | 6                | 0              | 8.204461                | 1.341363  | -0.001613 |
| 35               | 1                | 0              | 7.730379                | 1.760793  | -0.899405 |
| 36               | 1                | 0              | 7.730778                | 1.762308  | 0.895681  |
| 37               | 1                | 0              | 9.271081                | 1.576918  | -0.002028 |
| 38               | 8                | 0              | 8.128777                | -2.770670 | 0.000146  |
| 39               | 1                | 0              | 8.843034                | -2.095110 | -0.000061 |
| 40               | 8                | 0              | -8.300917               | -0.466429 | -0.000497 |
| 41               | 6                | 0              | -8.671337               | 0.938957  | -0.000688 |
| 42               | 1                | 0              | -8.290797               | 1.446020  | 0.896669  |
| 43               | 1                | 0              | -8.290694               | 1.445803  | -0.898123 |
| 44               | 1                | 0              | -9.763686               | 0.957826  | -0.000754 |
| 45               | 8                | 0              | -7.754128               | -3.082067 | -0.000008 |
| 46               | 1                | 0              | -8.595296               | -2.573710 | -0.000171 |
| 47               | 5                | 0              | -0.168313               | 3.608536  | 0.000462  |
| 48               | 9                | 0              | -0.284281               | 4.409000  | -1.170368 |
| 49               | 9                | 0              | -0.283928               | 4.405951  | 1.173495  |
| 50               | 6                | 0              | 0.682517                | -2.656147 | 0.000625  |
| 51               | 7                | 0              | -0.522540               | -2.606279 | 0.000625  |

## Optimized geometric parameters for **1c** in B3LYP/SDD

Standard orientation:

| Center<br>Number | Atomic<br>Number | Atomic<br>Type | Coordinates (Angstroms) |           |           |
|------------------|------------------|----------------|-------------------------|-----------|-----------|
|                  |                  |                | X                       | Y         | Z         |
| 1                | 6                | 0              | -4.539935               | -2.095297 | -0.248472 |
| 2                | 6                | 0              | -4.770908               | -0.729071 | -0.346924 |
| 3                | 6                | 0              | -3.373739               | -2.611385 | 0.460685  |
| 4                | 1                | 0              | -5.627602               | -0.359062 | -0.905782 |
| 5                | 6                | 0              | -3.873556               | 0.239330  | 0.224655  |
| 6                | 6                | 0              | -2.557183               | -1.625147 | 1.125819  |
| 7                | 1                | 0              | -1.738014               | -1.994166 | 1.737693  |
| 8                | 6                | 0              | -2.789158               | -0.262456 | 1.007071  |
| 9                | 1                | 0              | -2.158956               | 0.434832  | 1.549706  |
| 10               | 6                | 0              | -4.148730               | 1.634585  | 0.009102  |
| 11               | 1                | 0              | -5.187002               | 1.835084  | -0.272932 |
| 12               | 6                | 0              | -3.373125               | 2.790989  | 0.084832  |
| 13               | 1                | 0              | -3.909635               | 3.737549  | 0.046488  |
| 14               | 6                | 0              | -1.950705               | 2.984740  | 0.097620  |
| 15               | 8                | 0              | -1.557534               | 4.255823  | 0.334066  |
| 16               | 6                | 0              | -0.952808               | 2.008554  | -0.177430 |
| 17               | 1                | 0              | -1.240630               | 1.000408  | -0.430723 |
| 18               | 6                | 0              | 0.403232                | 2.329980  | -0.087237 |
| 19               | 8                | 0              | 0.809242                | 3.586100  | 0.188592  |
| 20               | 6                | 0              | 1.424289                | 1.304518  | -0.224729 |
| 21               | 1                | 0              | 1.045747                | 0.295732  | -0.371414 |
| 22               | 6                | 0              | 2.762973                | 1.558569  | -0.155810 |
| 23               | 1                | 0              | 3.061029                | 2.600600  | -0.044938 |
| 24               | 6                | 0              | 3.838702                | 0.565882  | -0.211443 |
| 25               | 6                | 0              | 3.586571                | -0.835215 | -0.144314 |
| 26               | 6                | 0              | 5.179658                | 1.007692  | -0.317151 |
| 27               | 1                | 0              | 2.570677                | -1.198375 | -0.035105 |
| 28               | 1                | 0              | 5.383375                | 2.074977  | -0.359380 |
| 29               | 6                | 0              | 4.646282                | -1.740833 | -0.190320 |
| 30               | 6                | 0              | 6.247900                | 0.094388  | -0.376213 |
| 31               | 1                | 0              | 7.277227                | 0.428320  | -0.461621 |
| 32               | 6                | 0              | 5.985420                | -1.277522 | -0.314999 |
| 33               | 8                | 0              | 4.553797                | -3.133603 | -0.115544 |
| 34               | 6                | 0              | 3.241494                | -3.745000 | 0.138944  |
| 35               | 1                | 0              | 2.818554                | -3.384184 | 1.082180  |
| 36               | 1                | 0              | 2.548396                | -3.537911 | -0.684171 |
| 37               | 1                | 0              | 3.415162                | -4.817894 | 0.208439  |
| 38               | 8                | 0              | 7.024139                | -2.202403 | -0.358574 |
| 39               | 1                | 0              | 6.643130                | -3.107335 | -0.286497 |
| 40               | 8                | 0              | -5.356762               | -3.079629 | -0.815775 |
| 41               | 6                | 0              | -6.528524               | -2.648655 | -1.551202 |
| 42               | 1                | 0              | -7.225052               | -2.085885 | -0.910204 |
| 43               | 1                | 0              | -6.255634               | -2.027758 | -2.418576 |
| 44               | 1                | 0              | -7.009212               | -3.567496 | -1.895691 |
| 45               | 8                | 0              | -3.102824               | -3.889207 | 0.495659  |
| 46               | 1                | 0              | -1.801927               | -4.362495 | 0.709668  |
| 47               | 5                | 0              | -0.144831               | 4.750251  | 0.164638  |
| 48               | 9                | 0              | -0.037123               | 5.413393  | -1.097720 |
| 49               | 9                | 0              | 0.169315                | 5.626564  | 1.230604  |
| 50               | 6                | 0              | 0.397777                | -5.036354 | 0.900105  |
| 51               | 7                | 0              | -0.738748               | -4.692316 | 0.811539  |

## Optimized geometric parameters for **1d** in B3LYP/SDD

Standard orientation:

| Center<br>Number | Atomic<br>Number | Atomic<br>Type | Coordinates (Angstroms) |           |           |
|------------------|------------------|----------------|-------------------------|-----------|-----------|
|                  |                  |                | X                       | Y         | Z         |
| 1                | 6                | 0              | -5.338216               | -1.985468 | -0.003658 |
| 2                | 6                | 0              | -4.159473               | -1.243217 | -0.001673 |
| 3                | 6                | 0              | -6.597946               | -1.335867 | -0.008045 |
| 4                | 1                | 0              | -3.174193               | -1.714328 | 0.001756  |
| 5                | 6                | 0              | -4.220629               | 0.180395  | -0.003948 |
| 6                | 6                | 0              | -6.666117               | 0.065957  | -0.010395 |
| 7                | 1                | 0              | -7.644520               | 0.536972  | -0.013752 |
| 8                | 6                | 0              | -5.483324               | 0.823635  | -0.008305 |
| 9                | 1                | 0              | -5.543064               | 1.908641  | -0.009995 |
| 10               | 6                | 0              | -2.926068               | 0.850059  | -0.001120 |
| 11               | 1                | 0              | -2.105275               | 0.134652  | 0.001733  |
| 12               | 6                | 0              | -2.609177               | 2.181764  | -0.002158 |
| 13               | 1                | 0              | -3.350543               | 2.976584  | -0.007412 |
| 14               | 6                | 0              | -1.214370               | 2.600756  | 0.002088  |
| 15               | 8                | 0              | -0.967895               | 3.919644  | -0.012025 |
| 16               | 6                | 0              | -0.144607               | 1.690032  | 0.016030  |
| 17               | 1                | 0              | -0.305495               | 0.622411  | 0.029078  |
| 18               | 6                | 0              | 1.182876                | 2.135860  | 0.003946  |
| 19               | 8                | 0              | 1.481290                | 3.445030  | -0.012138 |
| 20               | 6                | 0              | 2.210051                | 1.118999  | 0.004338  |
| 21               | 1                | 0              | 1.796233                | 0.113025  | 0.012690  |
| 22               | 6                | 0              | 3.561292                | 1.300072  | -0.006638 |
| 23               | 1                | 0              | 3.965299                | 2.312181  | -0.015565 |
| 24               | 6                | 0              | 4.511399                | 0.182993  | -0.007683 |
| 25               | 6                | 0              | 4.056210                | -1.170007 | 0.001834  |
| 26               | 6                | 0              | 5.903984                | 0.436210  | -0.018966 |
| 27               | 1                | 0              | 2.992614                | -1.399274 | 0.009684  |
| 28               | 1                | 0              | 6.257539                | 1.464933  | -0.026173 |
| 29               | 6                | 0              | 4.983979                | -2.207798 | -0.000187 |
| 30               | 6                | 0              | 6.836808                | -0.618130 | -0.021084 |
| 31               | 1                | 0              | 7.906455                | -0.432336 | -0.029726 |
| 32               | 6                | 0              | 6.380149                | -1.940130 | -0.011790 |
| 33               | 8                | 0              | 4.678044                | -3.575297 | 0.007792  |
| 34               | 6                | 0              | 3.257347                | -3.956114 | 0.031996  |
| 35               | 1                | 0              | 2.762575                | -3.566055 | 0.927502  |
| 36               | 1                | 0              | 2.728735                | -3.561785 | -0.841778 |
| 37               | 1                | 0              | 3.255960                | -5.048371 | 0.029689  |
| 38               | 8                | 0              | 7.280002                | -3.004867 | -0.013645 |
| 39               | 1                | 0              | 6.767889                | -3.845317 | -0.005762 |
| 40               | 8                | 0              | -5.421138               | -3.387652 | -0.001658 |
| 41               | 6                | 0              | -4.160070               | -4.134590 | 0.002739  |
| 42               | 1                | 0              | -3.564988               | -3.899211 | -0.887495 |
| 43               | 1                | 0              | -3.569527               | -3.896435 | 0.895258  |
| 44               | 1                | 0              | -4.447494               | -5.188307 | 0.003654  |
| 45               | 8                | 0              | -7.765986               | -2.095891 | -0.009978 |
| 46               | 1                | 0              | -7.522734               | -3.049103 | -0.007806 |
| 47               | 5                | 0              | 0.425338                | 4.525868  | 0.004453  |
| 48               | 9                | 0              | 0.575635                | 5.336209  | -1.151811 |
| 49               | 9                | 0              | 0.566808                | 5.291568  | 1.193508  |
| 50               | 6                | 0              | -0.654324               | -1.939823 | 0.008952  |
| 51               | 7                | 0              | 0.550387                | -1.909928 | 0.010352  |

## Optimized geometric parameters for **1e** in B3LYP/SDD

Standard orientation:

| Center<br>Number | Atomic<br>Number | Atomic<br>Type | Coordinates (Angstroms) |           |           |
|------------------|------------------|----------------|-------------------------|-----------|-----------|
|                  |                  |                | X                       | Y         | Z         |
| 1                | 6                | 0              | -7.175318               | -0.341248 | -0.016565 |
| 2                | 6                | 0              | -5.960893               | 0.334996  | -0.019536 |
| 3                | 6                | 0              | -7.241562               | -1.794326 | 0.005809  |
| 4                | 1                | 0              | -5.936040               | 1.422552  | -0.035828 |
| 5                | 6                | 0              | -4.708476               | -0.363839 | -0.001116 |
| 6                | 6                | 0              | -5.971585               | -2.471714 | 0.023866  |
| 7                | 1                | 0              | -6.007531               | -3.558350 | 0.040542  |
| 8                | 6                | 0              | -4.759016               | -1.789526 | 0.020487  |
| 9                | 1                | 0              | -3.831264               | -2.357836 | 0.035064  |
| 10               | 6                | 0              | -3.484482               | 0.395580  | -0.004498 |
| 11               | 1                | 0              | -3.582815               | 1.481837  | -0.020981 |
| 12               | 6                | 0              | -2.185336               | -0.076207 | 0.011137  |
| 13               | 1                | 0              | -1.972953               | -1.142371 | 0.028560  |
| 14               | 6                | 0              | -1.039123               | 0.790501  | 0.006126  |
| 15               | 8                | 0              | -1.259852               | 2.127169  | -0.026083 |
| 16               | 6                | 0              | 0.280955                | 0.294926  | 0.026394  |
| 17               | 1                | 0              | 0.433327                | -0.775952 | 0.051653  |
| 18               | 6                | 0              | 1.389948                | 1.171722  | 0.002735  |
| 19               | 8                | 0              | 1.174379                | 2.511093  | -0.024201 |
| 20               | 6                | 0              | 2.776298                | 0.792041  | -0.001951 |
| 21               | 1                | 0              | 3.461092                | 1.635916  | -0.017558 |
| 22               | 6                | 0              | 3.256684                | -0.506813 | 0.010830  |
| 23               | 1                | 0              | 2.522332                | -1.314707 | 0.024501  |
| 24               | 6                | 0              | 4.624807                | -0.945422 | 0.008519  |
| 25               | 6                | 0              | 5.743598                | -0.044532 | -0.009023 |
| 26               | 6                | 0              | 4.913289                | -2.343546 | 0.024152  |
| 27               | 1                | 0              | 5.552180                | 1.024179  | -0.020893 |
| 28               | 1                | 0              | 4.079502                | -3.046190 | 0.037626  |
| 29               | 6                | 0              | 7.046638                | -0.517869 | -0.010764 |
| 30               | 6                | 0              | 6.217992                | -2.826067 | 0.022799  |
| 31               | 1                | 0              | 6.426026                | -3.893200 | 0.034913  |
| 32               | 6                | 0              | 7.361340                | -1.949047 | 0.005351  |
| 33               | 8                | 0              | 8.189332                | 0.298469  | -0.027757 |
| 34               | 6                | 0              | 8.002459                | 1.735119  | -0.046012 |
| 35               | 1                | 0              | 7.452660                | 2.058090  | -0.943435 |
| 36               | 1                | 0              | 7.463096                | 2.082326  | 0.848663  |
| 37               | 1                | 0              | 9.009365                | 2.159723  | -0.057595 |
| 38               | 8                | 0              | 8.586391                | -2.391893 | 0.003866  |
| 39               | 1                | 0              | 10.011036               | -1.595428 | -0.012731 |
| 40               | 8                | 0              | -8.435826               | 0.277638  | -0.034086 |
| 41               | 6                | 0              | -8.489757               | 1.723205  | -0.058040 |
| 42               | 1                | 0              | -8.014720               | 2.160950  | 0.834013  |
| 43               | 1                | 0              | -8.002924               | 2.131550  | -0.957649 |
| 44               | 1                | 0              | -9.553595               | 1.973459  | -0.069093 |
| 45               | 8                | 0              | -8.370497               | -2.457880 | 0.009504  |
| 46               | 1                | 0              | -9.736612               | -2.041706 | -0.002975 |
| 47               | 5                | 0              | -0.175707               | 3.154846  | 0.026285  |
| 48               | 9                | 0              | -0.313016               | 4.038229  | -1.089955 |
| 49               | 9                | 0              | -0.292408               | 3.900692  | 1.245319  |
| 50               | 7                | 0              | -10.827244              | -1.866647 | -0.010028 |
| 51               | 6                | 0              | -12.006040              | -1.691406 | -0.017342 |
| 52               | 6                | 0              | 11.070961               | -1.210477 | -0.022607 |
| 53               | 7                | 0              | 12.184885               | -0.810843 | -0.032964 |

## Optimized geometric parameters for **1f** in B3LYP/SDD

Standard orientation:

| Center<br>Number | Atomic<br>Number | Atomic<br>Type | Coordinates (Angstroms) |           |           |
|------------------|------------------|----------------|-------------------------|-----------|-----------|
|                  |                  |                | X                       | Y         | Z         |
| 1                | 6                | 0              | -5.455739               | -1.843946 | -0.703198 |
| 2                | 6                | 0              | -5.340179               | -0.486391 | -0.976449 |
| 3                | 6                | 0              | -4.578910               | -2.500241 | 0.256491  |
| 4                | 1                | 0              | -6.020660               | -0.012773 | -1.681441 |
| 5                | 6                | 0              | -4.335462               | 0.338863  | -0.365090 |
| 6                | 6                | 0              | -3.592677               | -1.649271 | 0.871085  |
| 7                | 1                | 0              | -2.938938               | -2.110392 | 1.608094  |
| 8                | 6                | 0              | -3.467124               | -0.293700 | 0.571124  |
| 9                | 1                | 0              | -2.727525               | 0.298197  | 1.101101  |
| 10               | 6                | 0              | -4.365848               | 1.751043  | -0.684165 |
| 11               | 1                | 0              | -5.306188               | 2.038793  | -1.166131 |
| 12               | 6                | 0              | -3.530092               | 2.839420  | -0.496170 |
| 13               | 1                | 0              | -3.969875               | 3.811216  | -0.718422 |
| 14               | 6                | 0              | -2.141331               | 2.994644  | -0.116689 |
| 15               | 8                | 0              | -1.827256               | 4.287392  | 0.173070  |
| 16               | 6                | 0              | -1.123040               | 2.025690  | -0.137009 |
| 17               | 1                | 0              | -1.350829               | 1.008198  | -0.420218 |
| 18               | 6                | 0              | 0.225858                | 2.383479  | 0.119336  |
| 19               | 8                | 0              | 0.533081                | 3.661656  | 0.443254  |
| 20               | 6                | 0              | 1.303185                | 1.443705  | 0.032585  |
| 21               | 1                | 0              | 1.028658                | 0.421273  | -0.213873 |
| 22               | 6                | 0              | 2.625261                | 1.815707  | 0.226725  |
| 23               | 1                | 0              | 2.778332                | 2.869146  | 0.462670  |
| 24               | 6                | 0              | 3.808927                | 1.010337  | 0.143591  |
| 25               | 6                | 0              | 3.800698                | -0.396110 | -0.149152 |
| 26               | 6                | 0              | 5.079443                | 1.629099  | 0.348433  |
| 27               | 1                | 0              | 2.846852                | -0.892954 | -0.300632 |
| 28               | 1                | 0              | 5.105668                | 2.694462  | 0.575599  |
| 29               | 6                | 0              | 4.982106                | -1.118850 | -0.237485 |
| 30               | 6                | 0              | 6.267423                | 0.911728  | 0.259986  |
| 31               | 1                | 0              | 7.231381                | 1.389873  | 0.413718  |
| 32               | 6                | 0              | 6.289841                | -0.493830 | -0.041703 |
| 33               | 8                | 0              | 5.061741                | -2.488410 | -0.517294 |
| 34               | 6                | 0              | 3.828705                | -3.225521 | -0.711726 |
| 35               | 1                | 0              | 3.192542                | -3.189509 | 0.185524  |
| 36               | 1                | 0              | 3.260176                | -2.839013 | -1.571510 |
| 37               | 1                | 0              | 4.134563                | -4.256201 | -0.905268 |
| 38               | 8                | 0              | 7.410435                | -1.157750 | -0.131797 |
| 39               | 1                | 0              | 7.747779                | -2.527585 | -0.456125 |
| 40               | 8                | 0              | -6.417076               | -2.686403 | -1.292909 |
| 41               | 6                | 0              | -7.335097               | -2.096857 | -2.240770 |
| 42               | 1                | 0              | -7.950273               | -1.307911 | -1.777979 |
| 43               | 1                | 0              | -6.808320               | -1.670786 | -3.110005 |
| 44               | 1                | 0              | -7.980745               | -2.915735 | -2.570948 |
| 45               | 8                | 0              | -4.713471               | -3.771534 | 0.533600  |
| 46               | 1                | 0              | -4.190994               | -4.589847 | 1.553352  |
| 47               | 5                | 0              | -0.455332               | 4.779866  | 0.492347  |
| 48               | 9                | 0              | -0.083073               | 5.778302  | -0.468099 |
| 49               | 9                | 0              | -0.450413               | 5.357153  | 1.802222  |
| 50               | 6                | 0              | -3.495246               | -6.040116 | 3.200141  |
| 51               | 7                | 0              | -3.845577               | -5.284842 | 2.345970  |
| 52               | 6                | 0              | 8.622396                | -4.580920 | -0.954843 |
| 53               | 7                | 0              | 8.156751                | -3.515768 | -0.693115 |



Optimized geometric parameters for **1a-CN<sup>-</sup>** in B3LYP/SDD (gas phase)

Standard orientation:

| Center<br>Number | Atomic<br>Number | Atomic<br>Type | Coordinates (Angstroms) |           |           |
|------------------|------------------|----------------|-------------------------|-----------|-----------|
|                  |                  |                | X                       | Y         | Z         |
| 1                | 6                | 0              | -6.534147               | -0.233411 | -0.024710 |
| 2                | 6                | 0              | -5.310895               | 0.412595  | -0.031260 |
| 3                | 6                | 0              | -6.627440               | -1.695373 | 0.017498  |
| 4                | 1                | 0              | -5.258674               | 1.498455  | -0.061774 |
| 5                | 6                | 0              | -4.069400               | -0.318991 | 0.002411  |
| 6                | 6                | 0              | -5.366300               | -2.406845 | 0.050733  |
| 7                | 1                | 0              | -5.430145               | -3.491332 | 0.081817  |
| 8                | 6                | 0              | -4.148594               | -1.752445 | 0.043333  |
| 9                | 1                | 0              | -3.231570               | -2.336278 | 0.069442  |
| 10               | 6                | 0              | -2.841997               | 0.397480  | -0.005291 |
| 11               | 1                | 0              | -2.902614               | 1.485872  | -0.037903 |
| 12               | 6                | 0              | -1.544165               | -0.120880 | 0.025251  |
| 13               | 1                | 0              | -1.369001               | -1.192476 | 0.060519  |
| 14               | 6                | 0              | -0.392426               | 0.702704  | 0.012361  |
| 15               | 8                | 0              | -0.544406               | 2.043379  | -0.053017 |
| 16               | 6                | 0              | 0.932263                | 0.158289  | 0.048012  |
| 17               | 1                | 0              | 1.049797                | -0.916450 | 0.099716  |
| 18               | 6                | 0              | 2.041590                | 0.993850  | -0.003487 |
| 19               | 8                | 0              | 1.902465                | 2.339632  | -0.060200 |
| 20               | 6                | 0              | 3.441286                | 0.566920  | -0.013184 |
| 21               | 1                | 0              | 4.130939                | 1.407907  | -0.042013 |
| 22               | 6                | 0              | 3.898376                | -0.716236 | 0.008404  |
| 23               | 1                | 0              | 3.172815                | -1.529503 | 0.032631  |
| 24               | 6                | 0              | 5.302194                | -1.145321 | 0.002406  |
| 25               | 6                | 0              | 6.386307                | -0.223088 | -0.025573 |
| 26               | 6                | 0              | 5.599486                | -2.529299 | 0.025287  |
| 27               | 1                | 0              | 6.185428                | 0.842358  | -0.042461 |
| 28               | 1                | 0              | 4.782539                | -3.246830 | 0.046938  |
| 29               | 6                | 0              | 7.700789                | -0.689207 | -0.030400 |
| 30               | 6                | 0              | 6.925842                | -2.997020 | 0.020683  |
| 31               | 1                | 0              | 7.153803                | -4.058091 | 0.038315  |
| 32               | 6                | 0              | 7.981268                | -2.081012 | -0.007193 |
| 33               | 8                | 0              | 8.861077                | 0.104568  | -0.056998 |
| 34               | 6                | 0              | 8.713481                | 1.553661  | -0.085496 |
| 35               | 1                | 0              | 8.171545                | 1.873647  | -0.985309 |
| 36               | 1                | 0              | 8.188845                | 1.910922  | 0.810496  |
| 37               | 1                | 0              | 9.729717                | 1.952584  | -0.103517 |
| 38               | 8                | 0              | 9.301651                | -2.524167 | -0.012158 |
| 39               | 1                | 0              | 9.904377                | -1.747813 | -0.032877 |
| 40               | 8                | 0              | -7.779867               | 0.394596  | -0.055939 |
| 41               | 6                | 0              | -7.824771               | 1.843799  | -0.100969 |
| 42               | 1                | 0              | -7.351260               | 2.286715  | 0.788188  |
| 43               | 1                | 0              | -7.331707               | 2.231345  | -1.005229 |
| 44               | 1                | 0              | -8.886476               | 2.098434  | -0.120326 |
| 45               | 8                | 0              | -7.759848               | -2.321721 | 0.024778  |
| 46               | 1                | 0              | -9.217020               | -1.853219 | -0.003596 |
| 47               | 5                | 0              | 0.572694                | 3.037657  | 0.046955  |
| 48               | 9                | 0              | 0.460058                | 3.975406  | -1.014514 |
| 49               | 9                | 0              | 0.503597                | 3.697578  | 1.312530  |
| 50               | 7                | 0              | -10.264096              | -1.646637 | -0.020293 |
| 51               | 6                | 0              | -11.434017              | -1.424375 | -0.038757 |

Optimized geometric parameters for **1a-CN<sup>-</sup>** in B3LYP/SDD (solvent phase)

Standard orientation:

| Center<br>Number | Atomic<br>Number | Atomic<br>Type | Coordinates (Angstroms) |           |           |
|------------------|------------------|----------------|-------------------------|-----------|-----------|
|                  |                  |                | X                       | Y         | Z         |
| 1                | 6                | 0              | -6.526316               | -0.245512 | -0.005604 |
| 2                | 6                | 0              | -5.300140               | 0.406740  | -0.008527 |
| 3                | 6                | 0              | -6.603995               | -1.696140 | 0.013008  |
| 4                | 1                | 0              | -5.255381               | 1.492245  | -0.022060 |
| 5                | 6                | 0              | -4.063869               | -0.322856 | 0.005440  |
| 6                | 6                | 0              | -5.356061               | -2.407404 | 0.026990  |
| 7                | 1                | 0              | -5.407698               | -3.492800 | 0.040840  |
| 8                | 6                | 0              | -4.131799               | -1.751332 | 0.023088  |
| 9                | 1                | 0              | -3.217978               | -2.338653 | 0.034490  |
| 10               | 6                | 0              | -2.832025               | 0.408397  | 0.001742  |
| 11               | 1                | 0              | -2.913900               | 1.495341  | -0.007780 |
| 12               | 6                | 0              | -1.541195               | -0.106438 | 0.008716  |
| 13               | 1                | 0              | -1.360981               | -1.176879 | 0.016259  |
| 14               | 6                | 0              | -0.383060               | 0.719713  | 0.005852  |
| 15               | 8                | 0              | -0.555149               | 2.071775  | -0.004146 |
| 16               | 6                | 0              | 0.934136                | 0.190014  | 0.010959  |
| 17               | 1                | 0              | 1.056383                | -0.884311 | 0.017862  |
| 18               | 6                | 0              | 2.051142                | 1.030812  | 0.004013  |
| 19               | 8                | 0              | 1.881329                | 2.385437  | -0.002055 |
| 20               | 6                | 0              | 3.443783                | 0.625166  | 0.001254  |
| 21               | 1                | 0              | 4.141957                | 1.458086  | -0.001096 |
| 22               | 6                | 0              | 3.888992                | -0.669686 | 0.000579  |
| 23               | 1                | 0              | 3.154875                | -1.474804 | 0.001977  |
| 24               | 6                | 0              | 5.278671                | -1.118144 | -0.002286 |
| 25               | 6                | 0              | 6.383694                | -0.216461 | -0.004489 |
| 26               | 6                | 0              | 5.535308                | -2.512953 | -0.003060 |
| 27               | 1                | 0              | 6.214852                | 0.854270  | -0.003913 |
| 28               | 1                | 0              | 4.700739                | -3.209104 | -0.001403 |
| 29               | 6                | 0              | 7.685803                | -0.714052 | -0.007374 |
| 30               | 6                | 0              | 6.848189                | -3.012973 | -0.005963 |
| 31               | 1                | 0              | 7.044563                | -4.080268 | -0.006582 |
| 32               | 6                | 0              | 7.924536                | -2.118586 | -0.008128 |
| 33               | 8                | 0              | 8.862762                | 0.036823  | -0.009790 |
| 34               | 6                | 0              | 8.775425                | 1.500334  | -0.009248 |
| 35               | 1                | 0              | 8.256267                | 1.854762  | -0.907535 |
| 36               | 1                | 0              | 8.259876                | 1.854321  | 0.891288  |
| 37               | 1                | 0              | 9.807637                | 1.852301  | -0.011233 |
| 38               | 8                | 0              | 9.228724                | -2.592973 | -0.011029 |
| 39               | 1                | 0              | 9.862412                | -1.839275 | -0.012217 |
| 40               | 8                | 0              | -7.771125               | 0.390534  | -0.019572 |
| 41               | 6                | 0              | -7.804192               | 1.852484  | -0.041459 |
| 42               | 1                | 0              | -7.323502               | 2.271033  | 0.852390  |
| 43               | 1                | 0              | -7.313916               | 2.244170  | -0.942245 |
| 44               | 1                | 0              | -8.862255               | 2.119617  | -0.051017 |
| 45               | 8                | 0              | -7.750282               | -2.346358 | 0.017144  |
| 46               | 1                | 0              | -9.044461               | -1.902521 | 0.001801  |
| 47               | 5                | 0              | 0.555863                | 3.045963  | 0.010589  |
| 48               | 9                | 0              | 0.447075                | 3.909939  | -1.139420 |
| 49               | 9                | 0              | 0.450139                | 3.872377  | 1.189492  |
| 50               | 7                | 0              | -10.154897              | -1.703629 | -0.009291 |
| 51               | 6                | 0              | -11.330281              | -1.508571 | -0.020968 |

Optimized geometric parameters for **1a-CN<sup>-</sup>** in B3LYP/6-311++G\*\* (solvent phase)

Standard orientation:

| Center<br>Number | Atomic<br>Number | Atomic<br>Type | Coordinates (Angstroms) |           |           |
|------------------|------------------|----------------|-------------------------|-----------|-----------|
|                  |                  |                | X                       | Y         | Z         |
| 1                | 6                | 0              | -6.454246               | -0.264321 | -0.051800 |
| 2                | 6                | 0              | -5.231251               | 0.389356  | -0.057327 |
| 3                | 6                | 0              | -6.494702               | -1.677133 | 0.056462  |
| 4                | 1                | 0              | -5.196819               | 1.467910  | -0.139050 |
| 5                | 6                | 0              | -4.012704               | -0.321314 | 0.042384  |
| 6                | 6                | 0              | -5.286418               | -2.380277 | 0.156131  |
| 7                | 1                | 0              | -5.334370               | -3.459832 | 0.238284  |
| 8                | 6                | 0              | -4.067922               | -1.723430 | 0.149552  |
| 9                | 1                | 0              | -3.158168               | -2.305098 | 0.229174  |
| 10               | 6                | 0              | -2.778673               | 0.430687  | 0.031789  |
| 11               | 1                | 0              | -2.886861               | 1.508734  | -0.047500 |
| 12               | 6                | 0              | -1.511001               | -0.053601 | 0.109883  |
| 13               | 1                | 0              | -1.313606               | -1.115512 | 0.190072  |
| 14               | 6                | 0              | -0.351933               | 0.795568  | 0.088085  |
| 15               | 8                | 0              | -0.540022               | 2.095109  | -0.031105 |
| 16               | 6                | 0              | 0.938323                | 0.265484  | 0.162829  |
| 17               | 1                | 0              | 1.059175                | -0.802155 | 0.257104  |
| 18               | 6                | 0              | 2.049396                | 1.102757  | 0.045581  |
| 19               | 8                | 0              | 1.889318                | 2.407441  | -0.058762 |
| 20               | 6                | 0              | 3.427101                | 0.675094  | 0.001624  |
| 21               | 1                | 0              | 4.135537                | 1.491783  | -0.078364 |
| 22               | 6                | 0              | 3.847369                | -0.612895 | 0.053643  |
| 23               | 1                | 0              | 3.102654                | -1.400004 | 0.127877  |
| 24               | 6                | 0              | 5.214975                | -1.091321 | 0.021700  |
| 25               | 6                | 0              | 6.330403                | -0.225731 | -0.075684 |
| 26               | 6                | 0              | 5.440935                | -2.476314 | 0.090902  |
| 27               | 1                | 0              | 6.183931                | 0.843645  | -0.130485 |
| 28               | 1                | 0              | 4.595749                | -3.150583 | 0.164998  |
| 29               | 6                | 0              | 7.612004                | -0.741525 | -0.101100 |
| 30               | 6                | 0              | 6.729976                | -2.998163 | 0.067008  |
| 31               | 1                | 0              | 6.904061                | -4.065877 | 0.120768  |
| 32               | 6                | 0              | 7.818046                | -2.140934 | -0.028299 |
| 33               | 8                | 0              | 8.768567                | -0.026793 | -0.193400 |
| 34               | 6                | 0              | 8.695106                | 1.401188  | -0.285214 |
| 35               | 1                | 0              | 8.144529                | 1.702742  | -1.179894 |
| 36               | 1                | 0              | 8.222511                | 1.822422  | 0.605643  |
| 37               | 1                | 0              | 9.724141                | 1.745863  | -0.352963 |
| 38               | 8                | 0              | 9.077467                | -2.639175 | -0.052543 |
| 39               | 1                | 0              | 9.697977                | -1.897271 | -0.121608 |
| 40               | 8                | 0              | -7.669111               | 0.342784  | -0.143528 |
| 41               | 6                | 0              | -7.715800               | 1.765975  | -0.261003 |
| 42               | 1                | 0              | -7.272050               | 2.248128  | 0.614875  |
| 43               | 1                | 0              | -7.203895               | 2.102871  | -1.167079 |
| 44               | 1                | 0              | -8.771177               | 2.022598  | -0.322036 |
| 45               | 8                | 0              | -7.635319               | -2.378614 | 0.069602  |
| 46               | 1                | 0              | -8.493902               | -1.868877 | -0.015635 |
| 47               | 5                | 0              | 0.568772                | 3.061242  | 0.110822  |
| 48               | 9                | 0              | 0.433653                | 4.049161  | -0.866754 |
| 49               | 9                | 0              | 0.514610                | 3.639178  | 1.391321  |
| 50               | 7                | 0              | -10.221907              | -1.642163 | -0.130547 |
| 51               | 6                | 0              | -11.380901              | -1.503090 | -0.230093 |

Optimized geometric parameters for **1a-F** in B3LYP/SDD (gas phase)

Standard orientation:

| Center<br>Number | Atomic<br>Number | Atomic<br>Type | Coordinates (Angstroms) |           |           |
|------------------|------------------|----------------|-------------------------|-----------|-----------|
|                  |                  |                | X                       | Y         | Z         |
| 1                | 6                | 0              | -6.750652               | -0.311981 | -0.027742 |
| 2                | 6                | 0              | -5.532860               | 0.343764  | -0.033556 |
| 3                | 6                | 0              | -6.831456               | -1.775829 | 0.013561  |
| 4                | 1                | 0              | -5.489823               | 1.430066  | -0.063485 |
| 5                | 6                | 0              | -4.284433               | -0.376989 | 0.000194  |
| 6                | 6                | 0              | -5.563207               | -2.476282 | 0.046986  |
| 7                | 1                | 0              | -5.617959               | -3.561307 | 0.077453  |
| 8                | 6                | 0              | -4.351620               | -1.811730 | 0.040437  |
| 9                | 1                | 0              | -3.429555               | -2.387643 | 0.066601  |
| 10               | 6                | 0              | -3.064099               | 0.349391  | -0.006814 |
| 11               | 1                | 0              | -3.133750               | 1.437238  | -0.039341 |
| 12               | 6                | 0              | -1.760749               | -0.157784 | 0.024319  |
| 13               | 1                | 0              | -1.576592               | -1.227885 | 0.059837  |
| 14               | 6                | 0              | -0.616959               | 0.675168  | 0.011668  |
| 15               | 8                | 0              | -0.779631               | 2.015244  | -0.054287 |
| 16               | 6                | 0              | 0.713062                | 0.142283  | 0.047846  |
| 17               | 1                | 0              | 0.839729                | -0.931448 | 0.099940  |
| 18               | 6                | 0              | 1.814908                | 0.986905  | -0.003625 |
| 19               | 8                | 0              | 1.664780                | 2.332155  | -0.060852 |
| 20               | 6                | 0              | 3.218240                | 0.571821  | -0.012964 |
| 21               | 1                | 0              | 3.900525                | 1.418867  | -0.041996 |
| 22               | 6                | 0              | 3.687117                | -0.707083 | 0.009041  |
| 23               | 1                | 0              | 2.969124                | -1.527024 | 0.033469  |
| 24               | 6                | 0              | 5.095073                | -1.122853 | 0.003212  |
| 25               | 6                | 0              | 6.170355                | -0.190329 | -0.024919 |
| 26               | 6                | 0              | 5.405909                | -2.503874 | 0.026356  |
| 27               | 1                | 0              | 5.959218                | 0.873122  | -0.042035 |
| 28               | 1                | 0              | 4.595958                | -3.229281 | 0.048120  |
| 29               | 6                | 0              | 7.489322                | -0.643716 | -0.029644 |
| 30               | 6                | 0              | 6.736812                | -2.958685 | 0.021844  |
| 31               | 1                | 0              | 6.974991                | -4.017527 | 0.039682  |
| 32               | 6                | 0              | 7.783357                | -2.032579 | -0.006190 |
| 33               | 8                | 0              | 8.641889                | 0.161632  | -0.056382 |
| 34               | 6                | 0              | 8.479520                | 1.609073  | -0.084903 |
| 35               | 1                | 0              | 7.934230                | 1.923588  | -0.984638 |
| 36               | 1                | 0              | 7.951250                | 1.961055  | 0.811062  |
| 37               | 1                | 0              | 9.491620                | 2.018446  | -0.102993 |
| 38               | 8                | 0              | 9.108331                | -2.462922 | -0.011057 |
| 39               | 1                | 0              | 9.703062                | -1.680440 | -0.031958 |
| 40               | 8                | 0              | -8.000596               | 0.303464  | -0.058734 |
| 41               | 6                | 0              | -8.060372               | 1.751157  | -0.102183 |
| 42               | 1                | 0              | -7.591449               | 2.198755  | 0.787353  |
| 43               | 1                | 0              | -7.571310               | 2.145568  | -1.005934 |
| 44               | 1                | 0              | -9.124830               | 1.993835  | -0.121282 |
| 45               | 8                | 0              | -7.955899               | -2.414531 | 0.020018  |
| 46               | 1                | 0              | -9.379159               | -1.945933 | -0.010143 |
| 47               | 5                | 0              | 0.329095                | 3.017885  | 0.047258  |
| 48               | 9                | 0              | 0.208647                | 3.957224  | -1.012604 |
| 49               | 9                | 0              | 0.254429                | 3.676501  | 1.313822  |
| 50               | 9                | 0              | -10.368116              | -1.813826 | -0.026016 |

Optimized geometric parameters for **1a-F** in B3LYP/SDD (solvent phase)

Standard orientation:

| Center<br>Number | Atomic<br>Number | Atomic<br>Type | Coordinates (Angstroms) |           |           |
|------------------|------------------|----------------|-------------------------|-----------|-----------|
|                  |                  |                | X                       | Y         | Z         |
| 1                | 6                | 0              | -6.740184               | -0.332348 | -0.028282 |
| 2                | 6                | 0              | -5.519222               | 0.330047  | -0.038016 |
| 3                | 6                | 0              | -6.804435               | -1.783272 | 0.003446  |
| 4                | 1                | 0              | -5.483977               | 1.415737  | -0.058970 |
| 5                | 6                | 0              | -4.276582               | -0.388101 | -0.021729 |
| 6                | 6                | 0              | -5.550349               | -2.483213 | 0.013588  |
| 7                | 1                | 0              | -5.592809               | -3.568923 | 0.033818  |
| 8                | 6                | 0              | -4.331745               | -1.816875 | 0.001867  |
| 9                | 1                | 0              | -3.412847               | -2.396210 | 0.013398  |
| 10               | 6                | 0              | -3.051448               | 0.354608  | -0.026671 |
| 11               | 1                | 0              | -3.143487               | 1.440711  | -0.037837 |
| 12               | 6                | 0              | -1.755946               | -0.147912 | -0.016932 |
| 13               | 1                | 0              | -1.565427               | -1.216577 | -0.008759 |
| 14               | 6                | 0              | -0.605889               | 0.689755  | -0.015183 |
| 15               | 8                | 0              | -0.791531               | 2.040020  | -0.024317 |
| 16               | 6                | 0              | 0.716394                | 0.173235  | -0.005427 |
| 17               | 1                | 0              | 0.849222                | -0.899831 | 0.000747  |
| 18               | 6                | 0              | 1.824993                | 1.025313  | -0.005633 |
| 19               | 8                | 0              | 1.641487                | 2.378081  | -0.007189 |
| 20               | 6                | 0              | 3.221583                | 0.633659  | -0.004056 |
| 21               | 1                | 0              | 3.911517                | 1.473317  | 0.008669  |
| 22               | 6                | 0              | 3.679441                | -0.656690 | -0.019681 |
| 23               | 1                | 0              | 2.953177                | -1.468663 | -0.037327 |
| 24               | 6                | 0              | 5.073300                | -1.091782 | -0.017390 |
| 25               | 6                | 0              | 6.169535                | -0.179900 | 0.012741  |
| 26               | 6                | 0              | 5.343275                | -2.483796 | -0.046258 |
| 27               | 1                | 0              | 5.990519                | 0.888916  | 0.036248  |
| 28               | 1                | 0              | 4.515426                | -3.187588 | -0.068754 |
| 29               | 6                | 0              | 7.476300                | -0.665127 | 0.012767  |
| 30               | 6                | 0              | 6.660848                | -2.971264 | -0.047017 |
| 31               | 1                | 0              | 6.867481                | -4.036383 | -0.069506 |
| 32               | 6                | 0              | 7.728500                | -2.066968 | -0.017770 |
| 33               | 8                | 0              | 8.645939                | 0.096576  | 0.041136  |
| 34               | 6                | 0              | 8.544259                | 1.558546  | 0.083129  |
| 35               | 1                | 0              | 8.030560                | 1.934097  | -0.809670 |
| 36               | 1                | 0              | 8.016300                | 1.881135  | 0.988296  |
| 37               | 1                | 0              | 9.572919                | 1.920279  | 0.101836  |
| 38               | 8                | 0              | 9.037124                | -2.528931 | -0.017520 |
| 39               | 1                | 0              | 9.663610                | -1.769576 | 0.005750  |
| 40               | 8                | 0              | -7.989153               | 0.294630  | -0.047527 |
| 41               | 6                | 0              | -8.032237               | 1.755974  | -0.078379 |
| 42               | 1                | 0              | -7.554759               | 2.183490  | 0.812973  |
| 43               | 1                | 0              | -7.544392               | 2.145719  | -0.981363 |
| 44               | 1                | 0              | -9.092067               | 2.015912  | -0.089925 |
| 45               | 8                | 0              | -7.942929               | -2.448162 | 0.021426  |
| 46               | 1                | 0              | -9.206590               | -2.011004 | 0.084681  |
| 47               | 5                | 0              | 0.309412                | 3.025179  | 0.007059  |
| 48               | 9                | 0              | 0.197126                | 3.901359  | -1.132977 |
| 49               | 9                | 0              | 0.190122                | 3.836615  | 1.195279  |
| 50               | 9                | 0              | -10.248503              | -1.877029 | 0.146325  |

Optimized geometric parameters for **1a-F** in B3LYP/6-311++G\*\* (solvent phase)

Standard orientation:

| Center<br>Number | Atomic<br>Number | Atomic<br>Type | Coordinates (Angstroms) |           |           |
|------------------|------------------|----------------|-------------------------|-----------|-----------|
|                  |                  |                | X                       | Y         | Z         |
| 1                | 6                | 0              | -6.680533               | -0.344037 | -0.077624 |
| 2                | 6                | 0              | -5.470055               | 0.313306  | -0.094148 |
| 3                | 6                | 0              | -6.739897               | -1.782833 | 0.030499  |
| 4                | 1                | 0              | -5.439065               | 1.392843  | -0.172949 |
| 5                | 6                | 0              | -4.232529               | -0.386929 | -0.008539 |
| 6                | 6                | 0              | -5.488682               | -2.462883 | 0.108930  |
| 7                | 1                | 0              | -5.522347               | -3.544146 | 0.186428  |
| 8                | 6                | 0              | -4.283694               | -1.797928 | 0.091215  |
| 9                | 1                | 0              | -3.365653               | -2.370276 | 0.156436  |
| 10               | 6                | 0              | -3.018748               | 0.361307  | -0.022156 |
| 11               | 1                | 0              | -3.131677               | 1.439199  | -0.103786 |
| 12               | 6                | 0              | -1.730944               | -0.108681 | 0.059421  |
| 13               | 1                | 0              | -1.523809               | -1.168273 | 0.146016  |
| 14               | 6                | 0              | -0.594629               | 0.744927  | 0.036128  |
| 15               | 8                | 0              | -0.785407               | 2.048548  | -0.098886 |
| 16               | 6                | 0              | 0.713715                | 0.234228  | 0.124343  |
| 17               | 1                | 0              | 0.848435                | -0.830708 | 0.234193  |
| 18               | 6                | 0              | 1.808584                | 1.077755  | 0.007780  |
| 19               | 8                | 0              | 1.639728                | 2.387449  | -0.110048 |
| 20               | 6                | 0              | 3.197072                | 0.666713  | -0.018832 |
| 21               | 1                | 0              | 3.894649                | 1.495779  | -0.065236 |
| 22               | 6                | 0              | 3.637789                | -0.612845 | 0.003259  |
| 23               | 1                | 0              | 2.905186                | -1.414464 | 0.031411  |
| 24               | 6                | 0              | 5.016994                | -1.068836 | -0.011923 |
| 25               | 6                | 0              | 6.119514                | -0.182715 | -0.021319 |
| 26               | 6                | 0              | 5.266191                | -2.450677 | -0.018159 |
| 27               | 1                | 0              | 5.956295                | 0.885671  | -0.012760 |
| 28               | 1                | 0              | 4.431763                | -3.142361 | -0.009700 |
| 29               | 6                | 0              | 7.411186                | -0.675698 | -0.038223 |
| 30               | 6                | 0              | 6.565513                | -2.949647 | -0.036075 |
| 31               | 1                | 0              | 6.756061                | -4.016017 | -0.041438 |
| 32               | 6                | 0              | 7.640624                | -2.072178 | -0.046562 |
| 33               | 8                | 0              | 8.556954                | 0.064013  | -0.046711 |
| 34               | 6                | 0              | 8.458321                | 1.492907  | -0.034177 |
| 35               | 1                | 0              | 7.929932                | 1.852153  | -0.920900 |
| 36               | 1                | 0              | 7.949887                | 1.837673  | 0.869808  |
| 37               | 1                | 0              | 9.481906                | 1.859863  | -0.042607 |
| 38               | 8                | 0              | 8.911007                | -2.548872 | -0.062669 |
| 39               | 1                | 0              | 9.519297                | -1.794076 | -0.065637 |
| 40               | 8                | 0              | -7.900168               | 0.265848  | -0.158937 |
| 41               | 6                | 0              | -7.938640               | 1.686594  | -0.271045 |
| 42               | 1                | 0              | -7.484687               | 2.166517  | 0.601868  |
| 43               | 1                | 0              | -7.430524               | 2.027018  | -1.178936 |
| 44               | 1                | 0              | -8.992512               | 1.953623  | -0.323788 |
| 45               | 8                | 0              | -7.848224               | -2.436507 | 0.054358  |
| 46               | 1                | 0              | -9.153819               | -1.977995 | 0.061188  |
| 47               | 5                | 0              | 0.313604                | 3.016614  | 0.069970  |
| 48               | 9                | 0              | 0.168647                | 4.032033  | -0.882827 |
| 49               | 9                | 0              | 0.246911                | 3.570939  | 1.366032  |
| 50               | 9                | 0              | -10.163487              | -1.832975 | 0.084231  |

Optimized geometric parameters for **1a-Cl** in B3LYP/SDD (gas phase)

Standard orientation:

| Center<br>Number | Atomic<br>Number | Atomic<br>Type | Coordinates (Angstroms) |           |           |
|------------------|------------------|----------------|-------------------------|-----------|-----------|
|                  |                  |                | X                       | Y         | Z         |
| 1                | 6                | 0              | -6.372259               | -0.043245 | 0.393216  |
| 2                | 6                | 0              | -5.123332               | 0.572097  | 0.333653  |
| 3                | 6                | 0              | -6.462747               | -1.480999 | 0.380406  |
| 4                | 1                | 0              | -5.090838               | 1.659448  | 0.368734  |
| 5                | 6                | 0              | -3.903813               | -0.167467 | 0.266231  |
| 6                | 6                | 0              | -5.236310               | -2.221888 | 0.333195  |
| 7                | 1                | 0              | -5.326624               | -3.304198 | 0.335700  |
| 8                | 6                | 0              | -4.001497               | -1.595494 | 0.273493  |
| 9                | 1                | 0              | -3.100519               | -2.202046 | 0.230129  |
| 10               | 6                | 0              | -2.657162               | 0.541915  | 0.211724  |
| 11               | 1                | 0              | -2.708969               | 1.631013  | 0.219247  |
| 12               | 6                | 0              | -1.382189               | 0.001723  | 0.149100  |
| 13               | 1                | 0              | -1.226287               | -1.073224 | 0.136720  |
| 14               | 6                | 0              | -0.205249               | 0.807659  | 0.098060  |
| 15               | 8                | 0              | -0.335556               | 2.144701  | 0.124502  |
| 16               | 6                | 0              | 1.098149                | 0.232268  | 0.035157  |
| 17               | 1                | 0              | 1.191508                | -0.845364 | 0.014248  |
| 18               | 6                | 0              | 2.229095                | 1.049053  | 0.022003  |
| 19               | 8                | 0              | 2.114782                | 2.391389  | 0.042014  |
| 20               | 6                | 0              | 3.618527                | 0.594240  | -0.003814 |
| 21               | 1                | 0              | 4.326880                | 1.419267  | -0.018645 |
| 22               | 6                | 0              | 4.042209                | -0.700704 | -0.008118 |
| 23               | 1                | 0              | 3.295931                | -1.495168 | 0.010083  |
| 24               | 6                | 0              | 5.432795                | -1.166191 | -0.034454 |
| 25               | 6                | 0              | 6.540213                | -0.271900 | -0.059903 |
| 26               | 6                | 0              | 5.691015                | -2.558040 | -0.033837 |
| 27               | 1                | 0              | 6.368239                | 0.798734  | -0.061210 |
| 28               | 1                | 0              | 4.855054                | -3.253340 | -0.014733 |
| 29               | 6                | 0              | 7.841067                | -0.772880 | -0.082943 |
| 30               | 6                | 0              | 7.003521                | -3.061421 | -0.057224 |
| 31               | 1                | 0              | 7.203156                | -4.128149 | -0.056817 |
| 32               | 6                | 0              | 8.082868                | -2.173176 | -0.081670 |
| 33               | 8                | 0              | 9.021972                | -0.013166 | -0.109053 |
| 34               | 6                | 0              | 8.918410                | 1.440659  | -0.115190 |
| 35               | 1                | 0              | 8.379264                | 1.789715  | -1.005702 |
| 36               | 1                | 0              | 8.413067                | 1.799819  | 0.790987  |
| 37               | 1                | 0              | 9.946177                | 1.808128  | -0.136550 |
| 38               | 8                | 0              | 9.388028                | -2.651447 | -0.104818 |
| 39               | 1                | 0              | 10.014267               | -1.893604 | -0.120094 |
| 40               | 8                | 0              | -7.515591               | 0.742306  | 0.578035  |
| 41               | 6                | 0              | -8.178765               | 1.260381  | -0.638021 |
| 42               | 1                | 0              | -7.441293               | 1.764783  | -1.280940 |
| 43               | 1                | 0              | -8.695628               | 0.443951  | -1.156428 |
| 44               | 1                | 0              | -8.918242               | 1.978511  | -0.275182 |
| 45               | 8                | 0              | -7.593250               | -2.189031 | 0.448226  |
| 46               | 1                | 0              | -8.541521               | -1.807528 | 0.116931  |
| 47               | 5                | 0              | 0.796303                | 3.126205  | -0.010520 |
| 48               | 9                | 0              | 0.694379                | 3.785501  | -1.266924 |
| 49               | 9                | 0              | 0.744915                | 4.047564  | 1.063849  |
| 50               | 17               | 0              | -10.139361              | -1.549230 | -0.725519 |

Optimized geometric parameters for **1a-Cl** in B3LYP/SDD (solvent phase)

Standard orientation:

| Center<br>Number | Atomic<br>Number | Atomic<br>Type | Coordinates (Angstroms) |           |           |
|------------------|------------------|----------------|-------------------------|-----------|-----------|
|                  |                  |                | X                       | Y         | Z         |
| 1                | 6                | 0              | -6.344256               | -0.146457 | -0.093758 |
| 2                | 6                | 0              | -5.104337               | 0.498394  | -0.091192 |
| 3                | 6                | 0              | -6.406408               | -1.573963 | -0.075041 |
| 4                | 1                | 0              | -5.054130               | 1.583065  | -0.101323 |
| 5                | 6                | 0              | -3.886890               | -0.243714 | -0.077937 |
| 6                | 6                | 0              | -5.199077               | -2.309535 | -0.070172 |
| 7                | 1                | 0              | -5.265148               | -3.393232 | -0.060381 |
| 8                | 6                | 0              | -3.960624               | -1.663787 | -0.071747 |
| 9                | 1                | 0              | -3.055430               | -2.262639 | -0.063860 |
| 10               | 6                | 0              | -2.634391               | 0.488242  | -0.067857 |
| 11               | 1                | 0              | -2.711234               | 1.575217  | -0.066258 |
| 12               | 6                | 0              | -1.363987               | -0.040149 | -0.056561 |
| 13               | 1                | 0              | -1.193317               | -1.112099 | -0.058601 |
| 14               | 6                | 0              | -0.183659               | 0.779714  | -0.036907 |
| 15               | 8                | 0              | -0.349318               | 2.126474  | -0.034362 |
| 16               | 6                | 0              | 1.114458                | 0.230972  | -0.021223 |
| 17               | 1                | 0              | 1.222777                | -0.844373 | -0.025252 |
| 18               | 6                | 0              | 2.248886                | 1.063695  | -0.004132 |
| 19               | 8                | 0              | 2.088596                | 2.411937  | 0.007561  |
| 20               | 6                | 0              | 3.630419                | 0.640090  | 0.002311  |
| 21               | 1                | 0              | 4.342474                | 1.460317  | 0.023952  |
| 22               | 6                | 0              | 4.052039                | -0.665373 | -0.017905 |
| 23               | 1                | 0              | 3.302996                | -1.456042 | -0.042817 |
| 24               | 6                | 0              | 5.429794                | -1.137485 | -0.011047 |
| 25               | 6                | 0              | 6.550942                | -0.255333 | 0.025040  |
| 26               | 6                | 0              | 5.660055                | -2.537567 | -0.041626 |
| 27               | 1                | 0              | 6.401145                | 0.817847  | 0.049344  |
| 28               | 1                | 0              | 4.812642                | -3.217244 | -0.068644 |
| 29               | 6                | 0              | 7.842593                | -0.776636 | 0.029215  |
| 30               | 6                | 0              | 6.962327                | -3.061521 | -0.038010 |
| 31               | 1                | 0              | 7.139973                | -4.131659 | -0.061522 |
| 32               | 6                | 0              | 8.054661                | -2.186339 | -0.002872 |
| 33               | 8                | 0              | 9.033200                | -0.050845 | 0.063333  |
| 34               | 6                | 0              | 8.976301                | 1.414050  | 0.106488  |
| 35               | 1                | 0              | 8.478756                | 1.805570  | -0.788504 |
| 36               | 1                | 0              | 8.454325                | 1.751334  | 1.009661  |
| 37               | 1                | 0              | 10.015572               | 1.743436  | 0.130424  |
| 38               | 8                | 0              | 9.347375                | -2.683696 | 0.001638  |
| 39               | 1                | 0              | 9.996189                | -1.943116 | 0.028182  |
| 40               | 8                | 0              | -7.582873               | 0.490718  | -0.116809 |
| 41               | 6                | 0              | -7.623711               | 1.954122  | -0.113379 |
| 42               | 1                | 0              | -7.152267               | 2.356636  | 0.791960  |
| 43               | 1                | 0              | -7.129147               | 2.361788  | -1.003931 |
| 44               | 1                | 0              | -8.683069               | 2.213645  | -0.126518 |
| 45               | 8                | 0              | -7.580756               | -2.273339 | -0.070644 |
| 46               | 1                | 0              | -8.466471               | -1.773792 | 0.021935  |
| 47               | 5                | 0              | 0.769882                | 3.095363  | 0.024594  |
| 48               | 9                | 0              | 0.687794                | 3.987101  | -1.099519 |
| 49               | 9                | 0              | 0.660407                | 3.877773  | 1.227671  |
| 50               | 17               | 0              | -10.469439              | -1.576109 | 0.276467  |



Optimized geometric parameters for **1a-Cl** in B3LYP/6-311++G\*\* (solvent phase)

Standard orientation:

| Center<br>Number | Atomic<br>Number | Atomic<br>Type | Coordinates (Angstroms) |           |           |
|------------------|------------------|----------------|-------------------------|-----------|-----------|
|                  |                  |                | X                       | Y         | Z         |
| 1                | 6                | 0              | 6.271853                | -0.149804 | -0.051952 |
| 2                | 6                | 0              | 5.043615                | 0.494214  | -0.052978 |
| 3                | 6                | 0              | 6.321263                | -1.560873 | 0.029165  |
| 4                | 1                | 0              | 4.999378                | 1.573730  | -0.114867 |
| 5                | 6                | 0              | 3.833554                | -0.232287 | 0.026405  |
| 6                | 6                | 0              | 5.126255                | -2.282186 | 0.108032  |
| 7                | 1                | 0              | 5.184352                | -3.362506 | 0.169228  |
| 8                | 6                | 0              | 3.901248                | -1.635067 | 0.107079  |
| 9                | 1                | 0              | 2.996781                | -2.226722 | 0.169465  |
| 10               | 6                | 0              | 2.589701                | 0.507656  | 0.022548  |
| 11               | 1                | 0              | 2.686299                | 1.587625  | -0.043399 |
| 12               | 6                | 0              | 1.329377                | 0.007262  | 0.093030  |
| 13               | 1                | 0              | 1.144815                | -1.057676 | 0.162357  |
| 14               | 6                | 0              | 0.158116                | 0.842465  | 0.078452  |
| 15               | 8                | 0              | 0.330492                | 2.144487  | -0.030076 |
| 16               | 6                | 0              | -1.123538               | 0.294386  | 0.149944  |
| 17               | 1                | 0              | -1.229865               | -0.775542 | 0.234899  |
| 18               | 6                | 0              | -2.246658               | 1.118385  | 0.042268  |
| 19               | 8                | 0              | -2.103325               | 2.424875  | -0.054176 |
| 20               | 6                | 0              | -3.618111               | 0.672714  | 0.000717  |
| 21               | 1                | 0              | -4.337643               | 1.479350  | -0.081502 |
| 22               | 6                | 0              | -4.020847               | -0.620811 | 0.060606  |
| 23               | 1                | 0              | -3.265469               | -1.397094 | 0.140789  |
| 24               | 6                | 0              | -5.381441               | -1.117861 | 0.032442  |
| 25               | 6                | 0              | -6.508299               | -0.268760 | -0.078697 |
| 26               | 6                | 0              | -5.588637               | -2.504787 | 0.120544  |
| 27               | 1                | 0              | -6.376035               | 0.801596  | -0.148923 |
| 28               | 1                | 0              | -4.734439               | -3.166308 | 0.205061  |
| 29               | 6                | 0              | -7.782669               | -0.802139 | -0.098685 |
| 30               | 6                | 0              | -6.870360               | -3.044303 | 0.102844  |
| 31               | 1                | 0              | -7.030125               | -4.113389 | 0.171478  |
| 32               | 6                | 0              | -7.969803               | -2.203186 | -0.005920 |
| 33               | 8                | 0              | -8.948584               | -0.104791 | -0.203459 |
| 34               | 6                | 0              | -8.894415               | 1.322359  | -0.319396 |
| 35               | 1                | 0              | -8.430854               | 1.765235  | 0.565677  |
| 36               | 1                | 0              | -8.344867               | 1.616032  | -1.217296 |
| 37               | 1                | 0              | -9.927849               | 1.651558  | -0.396403 |
| 38               | 8                | 0              | -9.222095               | -2.718589 | -0.024838 |
| 39               | 1                | 0              | -9.852434               | -1.986186 | -0.105644 |
| 40               | 8                | 0              | 7.486017                | 0.461173  | -0.124172 |
| 41               | 6                | 0              | 7.533223                | 1.887341  | -0.217214 |
| 42               | 1                | 0              | 7.026651                | 2.237632  | -1.120860 |
| 43               | 1                | 0              | 7.083517                | 2.352665  | 0.664348  |
| 44               | 1                | 0              | 8.588824                | 2.144587  | -0.267150 |
| 45               | 8                | 0              | 7.481023                | -2.245412 | 0.033284  |
| 46               | 1                | 0              | 8.288238                | -1.685281 | -0.027767 |
| 47               | 5                | 0              | -0.790748               | 3.096892  | 0.110101  |
| 48               | 9                | 0              | -0.741875               | 3.679855  | 1.387867  |
| 49               | 9                | 0              | -0.670731               | 4.082186  | -0.871809 |
| 50               | 17               | 0              | 10.552303               | -1.577905 | -0.107202 |

Optimized geometric parameters for **1a-Br<sup>-</sup>** in B3LYP/SDD (gas phase)

Standard orientation:

| Center<br>Number | Atomic<br>Number | Atomic<br>Type | Coordinates (Angstroms) |           |           |
|------------------|------------------|----------------|-------------------------|-----------|-----------|
|                  |                  |                | X                       | Y         | Z         |
| 1                | 6                | 0              | -5.595540               | 0.066528  | -0.178065 |
| 2                | 6                | 0              | -4.345006               | 0.679225  | -0.146686 |
| 3                | 6                | 0              | -5.700883               | -1.368951 | -0.172784 |
| 4                | 1                | 0              | -4.270218               | 1.763735  | -0.146370 |
| 5                | 6                | 0              | -3.138973               | -0.091574 | -0.121476 |
| 6                | 6                | 0              | -4.500716               | -2.130441 | -0.157030 |
| 7                | 1                | 0              | -4.603645               | -3.211118 | -0.156772 |
| 8                | 6                | 0              | -3.253603               | -1.513601 | -0.131916 |
| 9                | 1                | 0              | -2.359522               | -2.130638 | -0.115553 |
| 10               | 6                | 0              | -1.876886               | 0.596879  | -0.091007 |
| 11               | 1                | 0              | -1.910253               | 1.686833  | -0.087565 |
| 12               | 6                | 0              | -0.610402               | 0.038746  | -0.065025 |
| 13               | 1                | 0              | -0.467365               | -1.038005 | -0.063616 |
| 14               | 6                | 0              | 0.578547                | 0.831463  | -0.037121 |
| 15               | 8                | 0              | 0.460201                | 2.169381  | -0.053505 |
| 16               | 6                | 0              | 1.874829                | 0.241866  | -0.003824 |
| 17               | 1                | 0              | 1.956968                | -0.836736 | 0.009555  |
| 18               | 6                | 0              | 3.015593                | 1.047162  | -0.003715 |
| 19               | 8                | 0              | 2.914167                | 2.389808  | -0.015936 |
| 20               | 6                | 0              | 4.399517                | 0.577198  | 0.001977  |
| 21               | 1                | 0              | 5.117794                | 1.393606  | 0.005301  |
| 22               | 6                | 0              | 4.807128                | -0.723232 | 0.003811  |
| 23               | 1                | 0              | 4.050570                | -1.508109 | -0.001199 |
| 24               | 6                | 0              | 6.191256                | -1.206737 | 0.012422  |
| 25               | 6                | 0              | 7.310720                | -0.327121 | 0.020454  |
| 26               | 6                | 0              | 6.430520                | -2.602044 | 0.012947  |
| 27               | 1                | 0              | 7.153172                | 0.745756  | 0.020657  |
| 28               | 1                | 0              | 5.585111                | -3.286062 | 0.007123  |
| 29               | 6                | 0              | 8.604815                | -0.845458 | 0.028377  |
| 30               | 6                | 0              | 7.736174                | -3.123003 | 0.021016  |
| 31               | 1                | 0              | 7.921525                | -4.192273 | 0.021590  |
| 32               | 6                | 0              | 8.827579                | -2.249161 | 0.028700  |
| 33               | 8                | 0              | 9.796008                | -0.102252 | 0.036829  |
| 34               | 6                | 0              | 9.713299                | 1.353050  | 0.038940  |
| 35               | 1                | 0              | 9.201898                | 1.716121  | -0.862252 |
| 36               | 1                | 0              | 9.190537                | 1.712838  | 0.934906  |
| 37               | 1                | 0              | 10.746415               | 1.705659  | 0.046091  |
| 38               | 8                | 0              | 10.125790               | -2.744880 | 0.036799  |
| 39               | 1                | 0              | 10.762942               | -1.996012 | 0.041805  |
| 40               | 8                | 0              | -6.818723               | 0.705093  | -0.225634 |
| 41               | 6                | 0              | -6.900600               | 2.147835  | -0.094188 |
| 42               | 1                | 0              | -6.442214               | 2.485536  | 0.846881  |
| 43               | 1                | 0              | -6.418270               | 2.652806  | -0.944574 |
| 44               | 1                | 0              | -7.970635               | 2.360092  | -0.086717 |
| 45               | 8                | 0              | -6.869156               | -2.028395 | -0.187325 |
| 46               | 1                | 0              | -7.775214               | -1.523831 | -0.089114 |
| 47               | 5                | 0              | 1.605036                | 3.140868  | 0.045069  |
| 48               | 9                | 0              | 1.545100                | 4.042493  | -1.045740 |
| 49               | 9                | 0              | 1.530515                | 3.823057  | 1.289882  |
| 50               | 35               | 0              | -9.812737               | -1.042751 | 0.219215  |

Optimized geometric parameters for **1a-Br<sup>-</sup>** in B3LYP/SDD (solvent phase)

Standard orientation:

| Center<br>Number | Atomic<br>Number | Atomic<br>Type | Coordinates (Angstroms) |           |           |
|------------------|------------------|----------------|-------------------------|-----------|-----------|
|                  |                  |                | X                       | Y         | Z         |
| 1                | 6                | 0              | -5.525606               | 0.157942  | -0.051553 |
| 2                | 6                | 0              | -4.266998               | 0.765131  | -0.048749 |
| 3                | 6                | 0              | -5.628171               | -1.262432 | -0.059179 |
| 4                | 1                | 0              | -4.181500               | 1.847513  | -0.041628 |
| 5                | 6                | 0              | -3.077615               | -0.020051 | -0.054503 |
| 6                | 6                | 0              | -4.456525               | -2.044192 | -0.067997 |
| 7                | 1                | 0              | -4.558097               | -3.124951 | -0.074922 |
| 8                | 6                | 0              | -3.196950               | -1.436187 | -0.065676 |
| 9                | 1                | 0              | -2.311740               | -2.063840 | -0.071562 |
| 10               | 6                | 0              | -1.798588               | 0.671346  | -0.045852 |
| 11               | 1                | 0              | -1.840383               | 1.760071  | -0.038834 |
| 12               | 6                | 0              | -0.548635               | 0.101508  | -0.042526 |
| 13               | 1                | 0              | -0.411885               | -0.975319 | -0.047718 |
| 14               | 6                | 0              | 0.660120                | 0.883768  | -0.027348 |
| 15               | 8                | 0              | 0.536425                | 2.234080  | -0.025199 |
| 16               | 6                | 0              | 1.937611                | 0.292927  | -0.015880 |
| 17               | 1                | 0              | 2.011075                | -0.785317 | -0.019255 |
| 18               | 6                | 0              | 3.099883                | 1.089462  | -0.004663 |
| 19               | 8                | 0              | 2.982413                | 2.440931  | 0.001846  |
| 20               | 6                | 0              | 4.465466                | 0.620237  | -0.000569 |
| 21               | 1                | 0              | 5.205633                | 1.415300  | 0.005698  |
| 22               | 6                | 0              | 4.841800                | -0.699687 | -0.001957 |
| 23               | 1                | 0              | 4.065444                | -1.463940 | -0.006798 |
| 24               | 6                | 0              | 6.202280                | -1.217452 | 0.003799  |
| 25               | 6                | 0              | 7.352105                | -0.372027 | 0.006994  |
| 26               | 6                | 0              | 6.385890                | -2.624833 | 0.006564  |
| 27               | 1                | 0              | 7.237366                | 0.705754  | 0.004519  |
| 28               | 1                | 0              | 5.516418                | -3.276533 | 0.004087  |
| 29               | 6                | 0              | 8.625786                | -0.935117 | 0.012867  |
| 30               | 6                | 0              | 7.670116                | -3.191162 | 0.012870  |
| 31               | 1                | 0              | 7.812505                | -4.266786 | 0.015267  |
| 32               | 6                | 0              | 8.790906                | -2.351742 | 0.016083  |
| 33               | 8                | 0              | 9.839850                | -0.248997 | 0.016161  |
| 34               | 6                | 0              | 9.832861                | 1.217829  | 0.012093  |
| 35               | 1                | 0              | 9.339216                | 1.596879  | -0.890415 |
| 36               | 1                | 0              | 9.332452                | 1.601889  | 0.908729  |
| 37               | 1                | 0              | 10.882896               | 1.512005  | 0.015226  |
| 38               | 8                | 0              | 10.066177               | -2.891006 | 0.022194  |
| 39               | 1                | 0              | 10.739182               | -2.171782 | 0.023568  |
| 40               | 8                | 0              | -6.751838               | 0.819535  | -0.047022 |
| 41               | 6                | 0              | -6.765941               | 2.285027  | -0.032398 |
| 42               | 1                | 0              | -6.274416               | 2.668882  | 0.869829  |
| 43               | 1                | 0              | -6.276644               | 2.686808  | -0.928003 |
| 44               | 1                | 0              | -7.820671               | 2.562710  | -0.028398 |
| 45               | 8                | 0              | -6.845606               | -1.907368 | -0.059543 |
| 46               | 1                | 0              | -7.646700               | -1.316976 | -0.031587 |
| 47               | 5                | 0              | 1.686276                | 3.168000  | 0.021319  |
| 48               | 9                | 0              | 1.627274                | 4.053214  | -1.108495 |
| 49               | 9                | 0              | 1.609071                | 3.959874  | 1.219567  |
| 50               | 35               | 0              | -10.131336              | -1.200838 | 0.075541  |

Optimized geometric parameters for **1a-Br<sup>-</sup>** in B3LYP/6-311++G\*\* (solvent phase)

Standard orientation:

| Center<br>Number | Atomic<br>Number | Atomic<br>Type | Coordinates (Angstroms) |           |           |
|------------------|------------------|----------------|-------------------------|-----------|-----------|
|                  |                  |                | X                       | Y         | Z         |
| 1                | 6                | 0              | -5.476781               | 0.136687  | -0.053321 |
| 2                | 6                | 0              | -4.230873               | 0.745246  | -0.060102 |
| 3                | 6                | 0              | -5.566946               | -1.269302 | 0.057485  |
| 4                | 1                | 0              | -4.154749               | 1.821614  | -0.142779 |
| 5                | 6                | 0              | -3.043827               | -0.015964 | 0.039283  |
| 6                | 6                | 0              | -4.396841               | -2.025824 | 0.155686  |
| 7                | 1                | 0              | -4.487065               | -3.102381 | 0.239339  |
| 8                | 6                | 0              | -3.153169               | -1.414213 | 0.146656  |
| 9                | 1                | 0              | -2.266929               | -2.030849 | 0.225964  |
| 10               | 6                | 0              | -1.777906               | 0.686979  | 0.029081  |
| 11               | 1                | 0              | -1.842669               | 1.768818  | -0.044415 |
| 12               | 6                | 0              | -0.533556               | 0.149574  | 0.101691  |
| 13               | 1                | 0              | -0.380588               | -0.920115 | 0.174377  |
| 14               | 6                | 0              | 0.663181                | 0.948639  | 0.084070  |
| 15               | 8                | 0              | 0.530892                | 2.255095  | -0.024882 |
| 16               | 6                | 0              | 1.926666                | 0.360712  | 0.154017  |
| 17               | 1                | 0              | 1.999225                | -0.712039 | 0.239323  |
| 18               | 6                | 0              | 3.075230                | 1.149296  | 0.044934  |
| 19               | 8                | 0              | 2.972646                | 2.459378  | -0.050789 |
| 20               | 6                | 0              | 4.431429                | 0.659753  | 0.001585  |
| 21               | 1                | 0              | 5.177665                | 1.441998  | -0.077902 |
| 22               | 6                | 0              | 4.790080                | -0.647024 | 0.054968  |
| 23               | 1                | 0              | 4.008126                | -1.396911 | 0.130234  |
| 24               | 6                | 0              | 6.132467                | -1.190559 | 0.024043  |
| 25               | 6                | 0              | 7.288277                | -0.379883 | -0.076212 |
| 26               | 6                | 0              | 6.290932                | -2.584713 | 0.097307  |
| 27               | 1                | 0              | 7.193328                | 0.695249  | -0.133900 |
| 28               | 1                | 0              | 5.414000                | -3.216812 | 0.174061  |
| 29               | 6                | 0              | 8.543273                | -0.957035 | -0.100954 |
| 30               | 6                | 0              | 7.553074                | -3.168369 | 0.074247  |
| 31               | 1                | 0              | 7.675415                | -4.243076 | 0.131033  |
| 32               | 6                | 0              | 8.681281                | -2.364825 | -0.024232 |
| 33               | 8                | 0              | 9.732925                | -0.299661 | -0.196169 |
| 34               | 6                | 0              | 9.728880                | 1.130233  | -0.289722 |
| 35               | 1                | 0              | 9.190173                | 1.457197  | -1.182684 |
| 36               | 1                | 0              | 9.280867                | 1.575030  | 0.602401  |
| 37               | 1                | 0              | 10.773241               | 1.424145  | -0.361855 |
| 38               | 8                | 0              | 9.914874                | -2.923096 | -0.047961 |
| 39               | 1                | 0              | 10.570268               | -2.211930 | -0.118752 |
| 40               | 8                | 0              | -6.674866               | 0.776596  | -0.146127 |
| 41               | 6                | 0              | -6.686373               | 2.202088  | -0.264517 |
| 42               | 1                | 0              | -6.230494               | 2.671014  | 0.611806  |
| 43               | 1                | 0              | -6.165616               | 2.522854  | -1.170928 |
| 44               | 1                | 0              | -7.735046               | 2.484054  | -0.325763 |
| 45               | 8                | 0              | -6.752891               | -1.912090 | 0.071117  |
| 46               | 1                | 0              | -7.523085               | -1.309461 | 0.004161  |
| 47               | 5                | 0              | 1.681460                | 3.172673  | 0.111511  |
| 48               | 9                | 0              | 1.591744                | 4.157751  | -0.873752 |
| 49               | 9                | 0              | 1.651511                | 3.760892  | 1.387225  |
| 50               | 35               | 0              | -10.037494              | -1.188809 | -0.062000 |

Optimized geometric parameters for **1a-AcO<sup>-</sup>** in B3LYP/SDD (gas phase)

Standard orientation:

| Center<br>Number | Atomic<br>Number | Atomic<br>Type | Coordinates (Angstroms) |           |           |
|------------------|------------------|----------------|-------------------------|-----------|-----------|
|                  |                  |                | X                       | Y         | Z         |
| 1                | 6                | 0              | -8.506508               | -0.804723 | 0.150210  |
| 2                | 6                | 0              | -7.335666               | -0.043276 | 0.121916  |
| 3                | 6                | 0              | -8.435962               | -2.222019 | 0.103748  |
| 4                | 1                | 0              | -7.382991               | 1.040952  | 0.156381  |
| 5                | 6                | 0              | -6.064059               | -0.680935 | 0.047118  |
| 6                | 6                | 0              | -7.189898               | -2.862103 | 0.029072  |
| 7                | 1                | 0              | -7.157119               | -3.946582 | -0.006145 |
| 8                | 6                | 0              | -6.013457               | -2.098929 | 0.001015  |
| 9                | 1                | 0              | -5.059242               | -2.612620 | -0.058046 |
| 10               | 6                | 0              | -4.871982               | 0.163895  | 0.020762  |
| 11               | 1                | 0              | -5.044884               | 1.238843  | 0.053715  |
| 12               | 6                | 0              | -3.568841               | -0.249962 | -0.039793 |
| 13               | 1                | 0              | -3.304996               | -1.303037 | -0.073664 |
| 14               | 6                | 0              | -2.452919               | 0.672407  | -0.062429 |
| 15               | 8                | 0              | -2.748852               | 2.002891  | -0.025457 |
| 16               | 6                | 0              | -1.127055               | 0.241938  | -0.119853 |
| 17               | 1                | 0              | -0.927755               | -0.820245 | -0.146833 |
| 18               | 6                | 0              | -0.050884               | 1.174668  | -0.143138 |
| 19               | 8                | 0              | -0.345850               | 2.506276  | -0.108570 |
| 20               | 6                | 0              | 1.337096                | 0.868149  | -0.199672 |
| 21               | 1                | 0              | 1.993345                | 1.733844  | -0.208045 |
| 22               | 6                | 0              | 1.862025                | -0.420005 | -0.239655 |
| 23               | 1                | 0              | 1.162986                | -1.255916 | -0.228779 |
| 24               | 6                | 0              | 3.241828                | -0.793199 | -0.291840 |
| 25               | 6                | 0              | 4.319178                | 0.157057  | -0.313364 |
| 26               | 6                | 0              | 3.575476                | -2.183410 | -0.321913 |
| 27               | 1                | 0              | 4.092968                | 1.217388  | -0.292219 |
| 28               | 1                | 0              | 2.772297                | -2.917429 | -0.306591 |
| 29               | 6                | 0              | 5.639621                | -0.263767 | -0.361006 |
| 30               | 6                | 0              | 4.897191                | -2.610033 | -0.368789 |
| 31               | 1                | 0              | 5.143887                | -3.667748 | -0.391949 |
| 32               | 6                | 0              | 5.988469                | -1.680193 | -0.390961 |
| 33               | 8                | 0              | 6.746165                | 0.587744  | -0.381502 |
| 34               | 6                | 0              | 6.514082                | 2.032754  | -0.380538 |
| 35               | 1                | 0              | 5.940904                | 2.337009  | -1.265735 |
| 36               | 1                | 0              | 5.986377                | 2.345653  | 0.529527  |
| 37               | 1                | 0              | 7.506016                | 2.486510  | -0.407679 |
| 38               | 8                | 0              | 7.235271                | -2.097689 | -0.434545 |
| 39               | 1                | 0              | 8.439761                | -1.402542 | -0.434998 |
| 40               | 8                | 0              | -9.814469               | -0.318549 | 0.222259  |
| 41               | 6                | 0              | -10.031213              | 1.130204  | 0.277759  |
| 42               | 1                | 0              | -9.561835               | 1.555784  | 1.172650  |
| 43               | 1                | 0              | -9.635034               | 1.613484  | -0.623152 |
| 44               | 1                | 0              | -11.113007              | 1.260303  | 0.326145  |
| 45               | 8                | 0              | -9.603814               | -2.974049 | 0.131913  |
| 46               | 1                | 0              | -10.386610              | -2.379466 | 0.185705  |
| 47               | 5                | 0              | -1.716787               | 3.060466  | -0.035719 |
| 48               | 9                | 0              | -1.936055               | 3.929680  | -1.166239 |
| 49               | 9                | 0              | -1.840483               | 3.860183  | 1.159580  |
| 50               | 8                | 0              | 9.457397                | -1.054987 | -0.500684 |
| 51               | 8                | 0              | 11.188934               | -0.066951 | 0.579351  |
| 52               | 6                | 0              | 10.016004               | -0.522751 | 0.605277  |
| 53               | 6                | 0              | 9.155337                | -0.514564 | 1.860572  |
| 54               | 1                | 0              | 8.894391                | -1.541625 | 2.144067  |
| 55               | 1                | 0              | 9.688917                | -0.036317 | 2.684412  |
| 56               | 1                | 0              | 8.218967                | 0.017963  | 1.660642  |

Optimized geometric parameters for **1a-AcO<sup>-</sup>** in B3LYP/SDD (solvent phase)

Standard orientation:

| Center<br>Number | Atomic<br>Number | Atomic<br>Type | Coordinates (Angstroms) |           |           |
|------------------|------------------|----------------|-------------------------|-----------|-----------|
|                  |                  |                | X                       | Y         | Z         |
| 1                | 6                | 0              | -8.506508               | -0.804723 | 0.150210  |
| 2                | 6                | 0              | -7.335666               | -0.043276 | 0.121916  |
| 3                | 6                | 0              | -8.435962               | -2.222019 | 0.103748  |
| 4                | 1                | 0              | -7.382991               | 1.040952  | 0.156381  |
| 5                | 6                | 0              | -6.064059               | -0.680935 | 0.047118  |
| 6                | 6                | 0              | -7.189898               | -2.862103 | 0.029072  |
| 7                | 1                | 0              | -7.157119               | -3.946582 | -0.006145 |
| 8                | 6                | 0              | -6.013457               | -2.098929 | 0.001015  |
| 9                | 1                | 0              | -5.059242               | -2.612620 | -0.058046 |
| 10               | 6                | 0              | -4.871982               | 0.163895  | 0.020762  |
| 11               | 1                | 0              | -5.044884               | 1.238843  | 0.053715  |
| 12               | 6                | 0              | -3.568841               | -0.249962 | -0.039793 |
| 13               | 1                | 0              | -3.304996               | -1.303037 | -0.073664 |
| 14               | 6                | 0              | -2.452919               | 0.672407  | -0.062429 |
| 15               | 8                | 0              | -2.748852               | 2.002891  | -0.025457 |
| 16               | 6                | 0              | -1.127055               | 0.241938  | -0.119853 |
| 17               | 1                | 0              | -0.927755               | -0.820245 | -0.146833 |
| 18               | 6                | 0              | -0.050884               | 1.174668  | -0.143138 |
| 19               | 8                | 0              | -0.345850               | 2.506276  | -0.108570 |
| 20               | 6                | 0              | 1.337096                | 0.868149  | -0.199672 |
| 21               | 1                | 0              | 1.993345                | 1.733844  | -0.208045 |
| 22               | 6                | 0              | 1.862025                | -0.420005 | -0.239655 |
| 23               | 1                | 0              | 1.162986                | -1.255916 | -0.228779 |
| 24               | 6                | 0              | 3.241828                | -0.793199 | -0.291840 |
| 25               | 6                | 0              | 4.319178                | 0.157057  | -0.313364 |
| 26               | 6                | 0              | 3.575476                | -2.183410 | -0.321913 |
| 27               | 1                | 0              | 4.092968                | 1.217388  | -0.292219 |
| 28               | 1                | 0              | 2.772297                | -2.917429 | -0.306591 |
| 29               | 6                | 0              | 5.639621                | -0.263767 | -0.361006 |
| 30               | 6                | 0              | 4.897191                | -2.610033 | -0.368789 |
| 31               | 1                | 0              | 5.143887                | -3.667748 | -0.391949 |
| 32               | 6                | 0              | 5.988469                | -1.680193 | -0.390961 |
| 33               | 8                | 0              | 6.746165                | 0.587744  | -0.381502 |
| 34               | 6                | 0              | 6.514082                | 2.032754  | -0.380538 |
| 35               | 1                | 0              | 5.940904                | 2.337009  | -1.265735 |
| 36               | 1                | 0              | 5.986377                | 2.345653  | 0.529527  |
| 37               | 1                | 0              | 7.506016                | 2.486510  | -0.407679 |
| 38               | 8                | 0              | 7.235271                | -2.097689 | -0.434545 |
| 39               | 1                | 0              | 8.439761                | -1.402542 | -0.434998 |
| 40               | 8                | 0              | -9.814469               | -0.318549 | 0.222259  |
| 41               | 6                | 0              | -10.031213              | 1.130204  | 0.277759  |
| 42               | 1                | 0              | -9.561835               | 1.555784  | 1.172650  |
| 43               | 1                | 0              | -9.635034               | 1.613484  | -0.623152 |
| 44               | 1                | 0              | -11.113007              | 1.260303  | 0.326145  |
| 45               | 8                | 0              | -9.603814               | -2.974049 | 0.131913  |
| 46               | 1                | 0              | -10.386610              | -2.379466 | 0.185705  |
| 47               | 5                | 0              | -1.716787               | 3.060466  | -0.035719 |
| 48               | 9                | 0              | -1.936055               | 3.929680  | -1.166239 |
| 49               | 9                | 0              | -1.840483               | 3.860183  | 1.159580  |
| 50               | 8                | 0              | 9.457397                | -1.054987 | -0.500684 |
| 51               | 8                | 0              | 11.188934               | -0.066951 | 0.579351  |
| 52               | 6                | 0              | 10.016004               | -0.522751 | 0.605277  |
| 53               | 6                | 0              | 9.155337                | -0.514564 | 1.860572  |
| 54               | 1                | 0              | 8.894391                | -1.541625 | 2.144067  |
| 55               | 1                | 0              | 9.688917                | -0.036317 | 2.684412  |
| 56               | 1                | 0              | 8.218967                | 0.017963  | 1.660642  |

Optimized geometric parameters for **1a-AcO<sup>-</sup>** in B3LYP/6-311++G\*\* (solvent phase)

Standard orientation:

| Center<br>Number | Atomic<br>Number | Atomic<br>Type | Coordinates (Angstroms) |           |           |
|------------------|------------------|----------------|-------------------------|-----------|-----------|
|                  |                  |                | X                       | Y         | Z         |
| 1                | 6                | 0              | -8.506508               | -0.804723 | 0.150210  |
| 2                | 6                | 0              | -7.335666               | -0.043276 | 0.121916  |
| 3                | 6                | 0              | -8.435962               | -2.222019 | 0.103748  |
| 4                | 1                | 0              | -7.382991               | 1.040952  | 0.156381  |
| 5                | 6                | 0              | -6.064059               | -0.680935 | 0.047118  |
| 6                | 6                | 0              | -7.189898               | -2.862103 | 0.029072  |
| 7                | 1                | 0              | -7.157119               | -3.946582 | -0.006145 |
| 8                | 6                | 0              | -6.013457               | -2.098929 | 0.001015  |
| 9                | 1                | 0              | -5.059242               | -2.612620 | -0.058046 |
| 10               | 6                | 0              | -4.871982               | 0.163895  | 0.020762  |
| 11               | 1                | 0              | -5.044884               | 1.238843  | 0.053715  |
| 12               | 6                | 0              | -3.568841               | -0.249962 | -0.039793 |
| 13               | 1                | 0              | -3.304996               | -1.303037 | -0.073664 |
| 14               | 6                | 0              | -2.452919               | 0.672407  | -0.062429 |
| 15               | 8                | 0              | -2.748852               | 2.002891  | -0.025457 |
| 16               | 6                | 0              | -1.127055               | 0.241938  | -0.119853 |
| 17               | 1                | 0              | -0.927755               | -0.820245 | -0.146833 |
| 18               | 6                | 0              | -0.050884               | 1.174668  | -0.143138 |
| 19               | 8                | 0              | -0.345850               | 2.506276  | -0.108570 |
| 20               | 6                | 0              | 1.337096                | 0.868149  | -0.199672 |
| 21               | 1                | 0              | 1.993345                | 1.733844  | -0.208045 |
| 22               | 6                | 0              | 1.862025                | -0.420005 | -0.239655 |
| 23               | 1                | 0              | 1.162986                | -1.255916 | -0.228779 |
| 24               | 6                | 0              | 3.241828                | -0.793199 | -0.291840 |
| 25               | 6                | 0              | 4.319178                | 0.157057  | -0.313364 |
| 26               | 6                | 0              | 3.575476                | -2.183410 | -0.321913 |
| 27               | 1                | 0              | 4.092968                | 1.217388  | -0.292219 |
| 28               | 1                | 0              | 2.772297                | -2.917429 | -0.306591 |
| 29               | 6                | 0              | 5.639621                | -0.263767 | -0.361006 |
| 30               | 6                | 0              | 4.897191                | -2.610033 | -0.368789 |
| 31               | 1                | 0              | 5.143887                | -3.667748 | -0.391949 |
| 32               | 6                | 0              | 5.988469                | -1.680193 | -0.390961 |
| 33               | 8                | 0              | 6.746165                | 0.587744  | -0.381502 |
| 34               | 6                | 0              | 6.514082                | 2.032754  | -0.380538 |
| 35               | 1                | 0              | 5.940904                | 2.337009  | -1.265735 |
| 36               | 1                | 0              | 5.986377                | 2.345653  | 0.529527  |
| 37               | 1                | 0              | 7.506016                | 2.486510  | -0.407679 |
| 38               | 8                | 0              | 7.235271                | -2.097689 | -0.434545 |
| 39               | 1                | 0              | 8.439761                | -1.402542 | -0.434998 |
| 40               | 8                | 0              | -9.814469               | -0.318549 | 0.222259  |
| 41               | 6                | 0              | -10.031213              | 1.130204  | 0.277759  |
| 42               | 1                | 0              | -9.561835               | 1.555784  | 1.172650  |
| 43               | 1                | 0              | -9.635034               | 1.613484  | -0.623152 |
| 44               | 1                | 0              | -11.113007              | 1.260303  | 0.326145  |
| 45               | 8                | 0              | -9.603814               | -2.974049 | 0.131913  |
| 46               | 1                | 0              | -10.386610              | -2.379466 | 0.185705  |
| 47               | 5                | 0              | -1.716787               | 3.060466  | -0.035719 |
| 48               | 9                | 0              | -1.936055               | 3.929680  | -1.166239 |
| 49               | 9                | 0              | -1.840483               | 3.860183  | 1.159580  |
| 50               | 8                | 0              | 9.457397                | -1.054987 | -0.500684 |
| 51               | 8                | 0              | 11.188934               | -0.066951 | 0.579351  |
| 52               | 6                | 0              | 10.016004               | -0.522751 | 0.605277  |
| 53               | 6                | 0              | 9.155337                | -0.514564 | 1.860572  |
| 54               | 1                | 0              | 8.894391                | -1.541625 | 2.144067  |
| 55               | 1                | 0              | 9.688917                | -0.036317 | 2.684412  |
| 56               | 1                | 0              | 8.218967                | 0.017963  | 1.660642  |

Optimized geometric parameters for **1a-SCN<sup>-</sup>** in B3LYP/SDD (gas phase)

Standard orientation:

| Center<br>Number | Atomic<br>Number | Atomic<br>Type | Coordinates (Angstroms) |           |           |
|------------------|------------------|----------------|-------------------------|-----------|-----------|
|                  |                  |                | X                       | Y         | Z         |
| 1                | 6                | 0              | -5.694638               | -0.043239 | -0.013924 |
| 2                | 6                | 0              | -4.454750               | 0.574206  | -0.021201 |
| 3                | 6                | 0              | -5.817358               | -1.497642 | 0.027422  |
| 4                | 1                | 0              | -4.378314               | 1.658497  | -0.051029 |
| 5                | 6                | 0              | -3.233314               | -0.186234 | 0.010465  |
| 6                | 6                | 0              | -4.580195               | -2.240053 | 0.058738  |
| 7                | 1                | 0              | -4.670990               | -3.322325 | 0.089180  |
| 8                | 6                | 0              | -3.345010               | -1.615162 | 0.050370  |
| 9                | 1                | 0              | -2.443163               | -2.221966 | 0.075053  |
| 10               | 6                | 0              | -1.987172               | 0.504251  | 0.001822  |
| 11               | 1                | 0              | -2.024968               | 1.593732  | -0.028823 |
| 12               | 6                | 0              | -0.704137               | -0.041876 | 0.028917  |
| 13               | 1                | 0              | -0.551112               | -1.116903 | 0.061228  |
| 14               | 6                | 0              | 0.466882                | 0.759456  | 0.016121  |
| 15               | 8                | 0              | 0.339304                | 2.101020  | -0.043541 |
| 16               | 6                | 0              | 1.778433                | 0.188362  | 0.047781  |
| 17               | 1                | 0              | 1.874870                | -0.888555 | 0.094912  |
| 18               | 6                | 0              | 2.904893                | 1.003338  | -0.001170 |
| 19               | 8                | 0              | 2.791014                | 2.349788  | -0.053156 |
| 20               | 6                | 0              | 4.295967                | 0.549939  | -0.012264 |
| 21               | 1                | 0              | 5.001653                | 1.377291  | -0.041496 |
| 22               | 6                | 0              | 4.727006                | -0.742184 | 0.009237  |
| 23               | 1                | 0              | 3.985258                | -1.540684 | 0.034776  |
| 24               | 6                | 0              | 6.121538                | -1.199590 | 0.001814  |
| 25               | 6                | 0              | 7.223936                | -0.299395 | -0.029006 |
| 26               | 6                | 0              | 6.390004                | -2.589341 | 0.026248  |
| 27               | 1                | 0              | 7.044876                | 0.769923  | -0.047206 |
| 28               | 1                | 0              | 5.558565                | -3.289956 | 0.050058  |
| 29               | 6                | 0              | 8.528478                | -0.792231 | -0.034964 |
| 30               | 6                | 0              | 7.706338                | -3.084204 | 0.020559  |
| 31               | 1                | 0              | 7.912646                | -4.149617 | 0.039381  |
| 32               | 6                | 0              | 8.780177                | -2.189829 | -0.010064 |
| 33               | 8                | 0              | 9.704635                | -0.023219 | -0.064396 |
| 34               | 6                | 0              | 9.588325                | 1.428848  | -0.095921 |
| 35               | 1                | 0              | 9.052308                | 1.758298  | -0.995828 |
| 36               | 1                | 0              | 9.072973                | 1.799212  | 0.800102  |
| 37               | 1                | 0              | 10.612931               | 1.805463  | -0.116219 |
| 38               | 8                | 0              | 10.090386               | -2.659864 | -0.016217 |
| 39               | 1                | 0              | 10.709740               | -1.896709 | -0.038813 |
| 40               | 8                | 0              | -6.924668               | 0.614125  | -0.043721 |
| 41               | 6                | 0              | -6.937372               | 2.064809  | -0.088782 |
| 42               | 1                | 0              | -6.454409               | 2.496334  | 0.800636  |
| 43               | 1                | 0              | -6.436643               | 2.440305  | -0.993677 |
| 44               | 1                | 0              | -7.993112               | 2.342613  | -0.107771 |
| 45               | 8                | 0              | -6.966167               | -2.109071 | 0.036116  |
| 46               | 1                | 0              | -8.279438               | -1.628368 | 0.011075  |
| 47               | 5                | 0              | 1.475188                | 3.076931  | 0.046503  |
| 48               | 9                | 0              | 1.380855                | 4.003089  | -1.025338 |
| 49               | 9                | 0              | 1.418583                | 3.747818  | 1.304830  |
| 50               | 6                | 0              | -10.523348              | -1.124538 | -0.020532 |
| 51               | 7                | 0              | -9.364197               | -1.386244 | -0.004762 |
| 52               | 16               | 0              | -12.143706              | -0.760879 | -0.043801 |



Optimized geometric parameters for **1a-SCN<sup>-</sup>** in B3LYP/SDD (solvent phase)

Standard orientation:

| Center<br>Number | Atomic<br>Number | Atomic<br>Type | Coordinates (Angstroms) |           |           |
|------------------|------------------|----------------|-------------------------|-----------|-----------|
|                  |                  |                | X                       | Y         | Z         |
| 1                | 6                | 0              | -5.672501               | -0.035907 | -0.000271 |
| 2                | 6                | 0              | -4.422520               | 0.587697  | -0.000617 |
| 3                | 6                | 0              | -5.761692               | -1.465153 | 0.001157  |
| 4                | 1                | 0              | -4.354739               | 1.671486  | -0.001669 |
| 5                | 6                | 0              | -3.215212               | -0.172259 | 0.000377  |
| 6                | 6                | 0              | -4.560421               | -2.216163 | 0.002162  |
| 7                | 1                | 0              | -4.643609               | -3.298786 | 0.003245  |
| 8                | 6                | 0              | -3.312388               | -1.591565 | 0.001775  |
| 9                | 1                | 0              | -2.416774               | -2.204945 | 0.002618  |
| 10               | 6                | 0              | -1.953735               | 0.539778  | 0.000046  |
| 11               | 1                | 0              | -2.014621               | 1.627818  | -0.000598 |
| 12               | 6                | 0              | -0.688928               | -0.005632 | 0.000532  |
| 13               | 1                | 0              | -0.532267               | -1.079734 | 0.001078  |
| 14               | 6                | 0              | 0.500218                | 0.798850  | 0.000475  |
| 15               | 8                | 0              | 0.351748                | 2.148100  | -0.000548 |
| 16               | 6                | 0              | 1.793286                | 0.235255  | 0.001185  |
| 17               | 1                | 0              | 1.889269                | -0.841326 | 0.001805  |
| 18               | 6                | 0              | 2.936558                | 1.054160  | 0.000513  |
| 19               | 8                | 0              | 2.793195                | 2.405107  | -0.000014 |
| 20               | 6                | 0              | 4.313804                | 0.614631  | 0.000097  |
| 21               | 1                | 0              | 5.034914                | 1.427246  | -0.000715 |
| 22               | 6                | 0              | 4.721443                | -0.695041 | 0.000769  |
| 23               | 1                | 0              | 3.964046                | -1.478178 | 0.001761  |
| 24               | 6                | 0              | 6.094917                | -1.180998 | 0.000415  |
| 25               | 6                | 0              | 7.224676                | -0.309361 | -0.001435 |
| 26               | 6                | 0              | 6.311701                | -2.583376 | 0.001983  |
| 27               | 1                | 0              | 7.085237                | 0.765502  | -0.002713 |
| 28               | 1                | 0              | 5.457764                | -3.255373 | 0.003357  |
| 29               | 6                | 0              | 8.511471                | -0.842762 | -0.001639 |
| 30               | 6                | 0              | 7.609128                | -3.119668 | 0.001841  |
| 31               | 1                | 0              | 7.776340                | -4.191762 | 0.003062  |
| 32               | 6                | 0              | 8.710010                | -2.254666 | 0.000045  |
| 33               | 8                | 0              | 9.709060                | -0.127476 | -0.003402 |
| 34               | 6                | 0              | 9.666082                | 1.338511  | -0.006140 |
| 35               | 1                | 0              | 9.159053                | 1.706116  | -0.905977 |
| 36               | 1                | 0              | 9.160514                | 1.709538  | 0.893111  |
| 37               | 1                | 0              | 10.708547               | 1.658576  | -0.007584 |
| 38               | 8                | 0              | 9.998251                | -2.764358 | -0.000168 |
| 39               | 1                | 0              | 10.653999               | -2.029479 | -0.001569 |
| 40               | 8                | 0              | -6.898296               | 0.628635  | -0.001206 |
| 41               | 6                | 0              | -6.903432               | 2.092808  | -0.003358 |
| 42               | 1                | 0              | -6.411605               | 2.487771  | 0.894507  |
| 43               | 1                | 0              | -6.411060               | 2.485099  | -0.902096 |
| 44               | 1                | 0              | -7.956638               | 2.377284  | -0.004087 |
| 45               | 8                | 0              | -6.937421               | -2.144324 | 0.001625  |
| 46               | 1                | 0              | -7.861651               | -1.662215 | 0.000668  |
| 47               | 5                | 0              | 1.482980                | 3.103911  | 0.002215  |
| 48               | 9                | 0              | 1.397118                | 3.947237  | -1.160136 |
| 49               | 9                | 0              | 1.397318                | 3.940301  | 1.169802  |
| 50               | 6                | 0              | -10.553099              | -1.159976 | -0.001158 |
| 51               | 7                | 0              | -9.377680               | -1.373769 | -0.000368 |
| 52               | 16               | 0              | -12.214766              | -0.856632 | -0.002282 |

Optimized geometric parameters for **1a-SCN<sup>-</sup>** in B3LYP/6-311++G\*\* (solvent phase)

Standard orientation:

| Center<br>Number | Atomic<br>Number | Atomic<br>Type | Coordinates (Angstroms) |           |           |
|------------------|------------------|----------------|-------------------------|-----------|-----------|
|                  |                  |                | X                       | Y         | Z         |
| 1                | 6                | 0              | -5.604367               | -0.090552 | 0.011275  |
| 2                | 6                | 0              | -4.368863               | 0.538902  | -0.003314 |
| 3                | 6                | 0              | -5.671244               | -1.500374 | 0.127676  |
| 4                | 1                | 0              | -4.313044               | 1.616047  | -0.091539 |
| 5                | 6                | 0              | -3.165395               | -0.196797 | 0.095121  |
| 6                | 6                | 0              | -4.480046               | -2.229337 | 0.226819  |
| 7                | 1                | 0              | -4.549710               | -3.307126 | 0.315732  |
| 8                | 6                | 0              | -3.248282               | -1.596632 | 0.211026  |
| 9                | 1                | 0              | -2.350212               | -2.196146 | 0.290423  |
| 10               | 6                | 0              | -1.915822               | 0.530596  | 0.073873  |
| 11               | 1                | 0              | -2.003334               | 1.610267  | -0.008367 |
| 12               | 6                | 0              | -0.658123               | 0.021554  | 0.144657  |
| 13               | 1                | 0              | -0.480755               | -1.043752 | 0.226172  |
| 14               | 6                | 0              | 0.517721                | 0.848223  | 0.112022  |
| 15               | 8                | 0              | 0.353423                | 2.150559  | -0.009275 |
| 16               | 6                | 0              | 1.797443                | 0.293291  | 0.178327  |
| 17               | 1                | 0              | 1.898366                | -0.776317 | 0.274041  |
| 18               | 6                | 0              | 2.923877                | 1.108842  | 0.049446  |
| 19               | 8                | 0              | 2.787891                | 2.415674  | -0.058337 |
| 20               | 6                | 0              | 4.292361                | 0.654489  | -0.004406 |
| 21               | 1                | 0              | 5.015575                | 1.456473  | -0.099032 |
| 22               | 6                | 0              | 4.688522                | -0.640790 | 0.056931  |
| 23               | 1                | 0              | 3.929701                | -1.412493 | 0.148164  |
| 24               | 6                | 0              | 6.046328                | -1.145193 | 0.015969  |
| 25               | 6                | 0              | 7.176334                | -0.302143 | -0.107992 |
| 26               | 6                | 0              | 6.247379                | -2.532944 | 0.103915  |
| 27               | 1                | 0              | 7.048947                | 0.768835  | -0.177917 |
| 28               | 1                | 0              | 5.390768                | -3.189987 | 0.198371  |
| 29               | 6                | 0              | 8.447725                | -0.842059 | -0.140642 |
| 30               | 6                | 0              | 7.526140                | -3.079095 | 0.073287  |
| 31               | 1                | 0              | 7.681076                | -4.148916 | 0.141638  |
| 32               | 6                | 0              | 8.628695                | -2.243874 | -0.048217 |
| 33               | 8                | 0              | 9.615995                | -0.150594 | -0.258240 |
| 34               | 6                | 0              | 9.567702                | 1.276701  | -0.374765 |
| 35               | 1                | 0              | 9.010150                | 1.572469  | -1.267032 |
| 36               | 1                | 0              | 9.115742                | 1.722610  | 0.514788  |
| 37               | 1                | 0              | 10.601885               | 1.600714  | -0.462967 |
| 38               | 8                | 0              | 9.878216                | -2.765735 | -0.079636 |
| 39               | 1                | 0              | 10.511268               | -2.036532 | -0.167683 |
| 40               | 8                | 0              | -6.809139               | 0.536523  | -0.078631 |
| 41               | 6                | 0              | -6.832815               | 1.959769  | -0.207620 |
| 42               | 1                | 0              | -6.377585               | 2.441061  | 0.662693  |
| 43               | 1                | 0              | -6.318894               | 2.279929  | -1.118482 |
| 44               | 1                | 0              | -7.884028               | 2.233134  | -0.266626 |
| 45               | 8                | 0              | -6.831441               | -2.174488 | 0.148382  |
| 46               | 1                | 0              | -7.657410               | -1.629849 | 0.063677  |
| 47               | 5                | 0              | 1.481684                | 3.095778  | 0.120133  |
| 48               | 9                | 0              | 1.357480                | 4.082782  | -0.859557 |
| 49               | 9                | 0              | 1.449669                | 3.678300  | 1.399082  |
| 50               | 6                | 0              | -10.573183              | -1.102154 | -0.139762 |
| 51               | 7                | 0              | -9.431170               | -1.357727 | -0.046009 |
| 52               | 16               | 0              | -12.183447              | -0.741438 | -0.271640 |

Optimized geometric parameters for **1a- NO<sub>3</sub><sup>-</sup>** in B3LYP/SDD (gas phase)

Standard orientation:

| Center<br>Number | Atomic<br>Number | Atomic<br>Type | Coordinates (Angstroms) |           |           |
|------------------|------------------|----------------|-------------------------|-----------|-----------|
|                  |                  |                | X                       | Y         | Z         |
| 1                | 6                | 0              | -5.815330               | -0.179467 | 0.521717  |
| 2                | 6                | 0              | -4.587160               | 0.462765  | 0.410638  |
| 3                | 6                | 0              | -5.882893               | -1.621267 | 0.590838  |
| 4                | 1                | 0              | -4.545920               | 1.547275  | 0.343464  |
| 5                | 6                | 0              | -3.355383               | -0.269517 | 0.395954  |
| 6                | 6                | 0              | -4.649553               | -2.342326 | 0.601634  |
| 7                | 1                | 0              | -4.718074               | -3.424226 | 0.664046  |
| 8                | 6                | 0              | -3.426036               | -1.693163 | 0.504996  |
| 9                | 1                | 0              | -2.512653               | -2.282029 | 0.502612  |
| 10               | 6                | 0              | -2.120417               | 0.450610  | 0.291959  |
| 11               | 1                | 0              | -2.186440               | 1.536805  | 0.221403  |
| 12               | 6                | 0              | -0.834241               | -0.070614 | 0.275026  |
| 13               | 1                | 0              | -0.659490               | -1.140949 | 0.336019  |
| 14               | 6                | 0              | 0.326828                | 0.750703  | 0.179674  |
| 15               | 8                | 0              | 0.172513                | 2.083869  | 0.090517  |
| 16               | 6                | 0              | 1.642077                | 0.197085  | 0.163668  |
| 17               | 1                | 0              | 1.755769                | -0.876512 | 0.234831  |
| 18               | 6                | 0              | 2.755170                | 1.027309  | 0.038208  |
| 19               | 8                | 0              | 2.616730                | 2.366239  | -0.042645 |
| 20               | 6                | 0              | 4.149774                | 0.592115  | -0.027732 |
| 21               | 1                | 0              | 4.843179                | 1.425962  | -0.109496 |
| 22               | 6                | 0              | 4.594477                | -0.695306 | 0.004434  |
| 23               | 1                | 0              | 3.862425                | -1.499367 | 0.081774  |
| 24               | 6                | 0              | 5.990686                | -1.141112 | -0.054507 |
| 25               | 6                | 0              | 7.082447                | -0.232647 | -0.151990 |
| 26               | 6                | 0              | 6.270848                | -2.528091 | -0.011944 |
| 27               | 1                | 0              | 6.893919                | 0.834691  | -0.184915 |
| 28               | 1                | 0              | 5.447066                | -3.234147 | 0.062298  |
| 29               | 6                | 0              | 8.389436                | -0.715523 | -0.203268 |
| 30               | 6                | 0              | 7.589518                | -3.013058 | -0.063482 |
| 31               | 1                | 0              | 7.805742                | -4.076079 | -0.031020 |
| 32               | 6                | 0              | 8.653243                | -2.110977 | -0.159034 |
| 33               | 8                | 0              | 9.556767                | 0.059815  | -0.299405 |
| 34               | 6                | 0              | 9.429522                | 1.510352  | -0.361414 |
| 35               | 1                | 0              | 8.854516                | 1.814099  | -1.246142 |
| 36               | 1                | 0              | 8.949666                | 1.899565  | 0.546225  |
| 37               | 1                | 0              | 10.449859               | 1.891869  | -0.433626 |
| 38               | 8                | 0              | 9.964573                | -2.570897 | -0.210781 |
| 39               | 1                | 0              | 10.577379               | -1.804827 | -0.276475 |
| 40               | 8                | 0              | -7.045360               | 0.456451  | 0.610182  |
| 41               | 6                | 0              | -7.189732               | 1.796580  | 0.060170  |
| 42               | 1                | 0              | -6.667796               | 2.540520  | 0.680417  |
| 43               | 1                | 0              | -6.817488               | 1.830960  | -0.971638 |
| 44               | 1                | 0              | -8.263126               | 1.994080  | 0.068233  |
| 45               | 8                | 0              | -7.024072               | -2.296463 | 0.645247  |
| 46               | 1                | 0              | -8.009025               | -1.836364 | 0.389730  |
| 47               | 5                | 0              | 1.295795                | 3.082939  | 0.098728  |
| 48               | 9                | 0              | 1.138180                | 3.971094  | -0.993315 |
| 49               | 9                | 0              | 1.289494                | 3.781444  | 1.339929  |
| 50               | 7                | 0              | -9.469159               | -0.762901 | -0.956126 |
| 51               | 8                | 0              | -9.281054               | -1.510821 | 0.149739  |
| 52               | 8                | 0              | -10.612878              | -0.199295 | -1.119345 |
| 53               | 8                | 0              | -8.495109               | -0.643307 | -1.802422 |

Optimized geometric parameters for **1a- NO<sub>3</sub><sup>-</sup>** in B3LYP/SDD (solvent phase)

Standard orientation:

| Center<br>Number | Atomic<br>Number | Atomic<br>Type | Coordinates (Angstroms) |           |           |
|------------------|------------------|----------------|-------------------------|-----------|-----------|
|                  |                  |                | X                       | Y         | Z         |
| 1                | 6                | 0              | -5.717769               | -0.011653 | 0.321551  |
| 2                | 6                | 0              | -4.469145               | 0.612141  | 0.258298  |
| 3                | 6                | 0              | -5.802492               | -1.437313 | 0.379964  |
| 4                | 1                | 0              | -4.402299               | 1.695061  | 0.214695  |
| 5                | 6                | 0              | -3.263592               | -0.149478 | 0.251098  |
| 6                | 6                | 0              | -4.606714               | -2.191770 | 0.374991  |
| 7                | 1                | 0              | -4.689301               | -3.273429 | 0.420226  |
| 8                | 6                | 0              | -3.359165               | -1.567066 | 0.312068  |
| 9                | 1                | 0              | -2.463549               | -2.180231 | 0.309838  |
| 10               | 6                | 0              | -2.001323               | 0.561742  | 0.182264  |
| 11               | 1                | 0              | -2.062695               | 1.649017  | 0.143333  |
| 12               | 6                | 0              | -0.738674               | 0.015064  | 0.159626  |
| 13               | 1                | 0              | -0.581784               | -1.058481 | 0.192576  |
| 14               | 6                | 0              | 0.451164                | 0.817951  | 0.088313  |
| 15               | 8                | 0              | 0.302312                | 2.166187  | 0.050749  |
| 16               | 6                | 0              | 1.741960                | 0.252392  | 0.059808  |
| 17               | 1                | 0              | 1.837418                | -0.823729 | 0.092767  |
| 18               | 6                | 0              | 2.885750                | 1.069843  | -0.002786 |
| 19               | 8                | 0              | 2.742094                | 2.419493  | -0.043995 |
| 20               | 6                | 0              | 4.261623                | 0.628728  | -0.026702 |
| 21               | 1                | 0              | 4.983361                | 1.439657  | -0.068400 |
| 22               | 6                | 0              | 4.667487                | -0.681595 | -0.003446 |
| 23               | 1                | 0              | 3.909172                | -1.462873 | 0.034881  |
| 24               | 6                | 0              | 6.039525                | -1.169776 | -0.026103 |
| 25               | 6                | 0              | 7.170121                | -0.300212 | -0.070991 |
| 26               | 6                | 0              | 6.254309                | -2.572365 | -0.001738 |
| 27               | 1                | 0              | 7.032028                | 0.774655  | -0.089343 |
| 28               | 1                | 0              | 5.399678                | -3.242585 | 0.032380  |
| 29               | 6                | 0              | 8.455740                | -0.835811 | -0.089865 |
| 30               | 6                | 0              | 7.550538                | -3.110867 | -0.021162 |
| 31               | 1                | 0              | 7.716370                | -4.183003 | -0.002947 |
| 32               | 6                | 0              | 8.652252                | -2.247918 | -0.065024 |
| 33               | 8                | 0              | 9.653981                | -0.123166 | -0.132811 |
| 34               | 6                | 0              | 9.613266                | 1.342583  | -0.165246 |
| 35               | 1                | 0              | 9.086656                | 1.692182  | -1.061004 |
| 36               | 1                | 0              | 9.128687                | 1.733397  | 0.737162  |
| 37               | 1                | 0              | 10.655940               | 1.660374  | -0.196779 |
| 38               | 8                | 0              | 9.939224                | -2.759682 | -0.084534 |
| 39               | 1                | 0              | 10.595863               | -2.026167 | -0.114487 |
| 40               | 8                | 0              | -6.946414               | 0.646178  | 0.337160  |
| 41               | 6                | 0              | -6.963454               | 2.108584  | 0.262079  |
| 42               | 1                | 0              | -6.446888               | 2.550365  | 1.123295  |
| 43               | 1                | 0              | -6.502342               | 2.457340  | -0.670383 |
| 44               | 1                | 0              | -8.018334               | 2.385883  | 0.280569  |
| 45               | 8                | 0              | -6.986500               | -2.111777 | 0.442798  |
| 46               | 1                | 0              | -7.869940               | -1.597174 | 0.413175  |
| 47               | 5                | 0              | 1.431852                | 3.118896  | -0.055383 |
| 48               | 9                | 0              | 1.308984                | 3.870009  | -1.277002 |
| 49               | 9                | 0              | 1.381742                | 4.041754  | 1.045317  |
| 50               | 7                | 0              | -10.112280              | -1.084081 | -0.563596 |
| 51               | 8                | 0              | -9.428900               | -1.294938 | 0.555662  |
| 52               | 8                | 0              | -11.370366              | -0.777771 | -0.482247 |
| 53               | 8                | 0              | -9.508721               | -1.189684 | -1.711066 |

Optimized geometric parameters for **1a-NO<sub>3</sub><sup>-</sup>** in B3LYP/6-311++G\*\* (solvent phase)

Standard orientation:

| Center<br>Number | Atomic<br>Number | Atomic<br>Type | Coordinates (Angstroms) |           |           |
|------------------|------------------|----------------|-------------------------|-----------|-----------|
|                  |                  |                | X                       | Y         | Z         |
| 1                | 6                | 0              | -8.466589               | -0.794333 | -0.240174 |
| 2                | 6                | 0              | -7.303515               | -0.042141 | -0.212896 |
| 3                | 6                | 0              | -8.397951               | -2.195764 | -0.097846 |
| 4                | 1                | 0              | -7.347577               | 1.033916  | -0.319987 |
| 5                | 6                | 0              | -6.045265               | -0.664391 | -0.044925 |
| 6                | 6                | 0              | -7.163633               | -2.818202 | 0.068531  |
| 7                | 1                | 0              | -7.132600               | -3.895834 | 0.175821  |
| 8                | 6                | 0              | -5.999344               | -2.062805 | 0.094641  |
| 9                | 1                | 0              | -5.051960               | -2.569930 | 0.225684  |
| 10               | 6                | 0              | -4.864656               | 0.178782  | -0.023336 |
| 11               | 1                | 0              | -5.047215               | 1.243466  | -0.135880 |
| 12               | 6                | 0              | -3.574615               | -0.211504 | 0.120479  |
| 13               | 1                | 0              | -3.305636               | -1.254158 | 0.237493  |
| 14               | 6                | 0              | -2.473607               | 0.719528  | 0.124687  |
| 15               | 8                | 0              | -2.750634               | 1.998340  | -0.038255 |
| 16               | 6                | 0              | -1.159374               | 0.283057  | 0.268664  |
| 17               | 1                | 0              | -0.970976               | -0.770882 | 0.398910  |
| 18               | 6                | 0              | -0.099867               | 1.194688  | 0.172192  |
| 19               | 8                | 0              | -0.349910               | 2.480397  | 0.025694  |
| 20               | 6                | 0              | 1.299191                | 0.861827  | 0.192761  |
| 21               | 1                | 0              | 1.957416                | 1.720072  | 0.120270  |
| 22               | 6                | 0              | 1.799412                | -0.398419 | 0.289580  |
| 23               | 1                | 0              | 1.101017                | -1.227988 | 0.349654  |
| 24               | 6                | 0              | 3.188606                | -0.791429 | 0.320047  |
| 25               | 6                | 0              | 4.255834                | 0.136709  | 0.263747  |
| 26               | 6                | 0              | 3.498173                | -2.160379 | 0.407907  |
| 27               | 1                | 0              | 4.045046                | 1.194682  | 0.200181  |
| 28               | 1                | 0              | 2.695173                | -2.887225 | 0.452790  |
| 29               | 6                | 0              | 5.571011                | -0.290313 | 0.291504  |
| 30               | 6                | 0              | 4.815784                | -2.593957 | 0.435488  |
| 31               | 1                | 0              | 5.055248                | -3.648513 | 0.501226  |
| 32               | 6                | 0              | 5.867943                | -1.678897 | 0.376551  |
| 33               | 8                | 0              | 6.662871                | 0.517960  | 0.246535  |
| 34               | 6                | 0              | 6.467796                | 1.930452  | 0.140942  |
| 35               | 1                | 0              | 5.933779                | 2.183897  | -0.779238 |
| 36               | 1                | 0              | 5.920335                | 2.316175  | 1.005518  |
| 37               | 1                | 0              | 7.464552                | 2.365127  | 0.116573  |
| 38               | 8                | 0              | 7.125110                | -2.143043 | 0.406890  |
| 39               | 1                | 0              | 7.837286                | -1.456364 | 0.325927  |
| 40               | 8                | 0              | -9.735231               | -0.317180 | -0.396278 |
| 41               | 6                | 0              | -9.926952               | 1.093139  | -0.558684 |
| 42               | 1                | 0              | -9.570872               | 1.636149  | 0.320470  |
| 43               | 1                | 0              | -9.413659               | 1.453041  | -1.454015 |
| 44               | 1                | 0              | -10.999512              | 1.234984  | -0.668275 |
| 45               | 8                | 0              | -9.532855               | -2.938511 | -0.122857 |
| 46               | 1                | 0              | -10.285502              | -2.340469 | -0.248128 |
| 47               | 5                | 0              | -1.718996               | 3.043192  | 0.127050  |
| 48               | 9                | 0              | -1.880489               | 4.000004  | -0.876628 |
| 49               | 9                | 0              | -1.866570               | 3.639898  | 1.391373  |
| 50               | 7                | 0              | 10.014455               | -0.489628 | -0.698924 |
| 51               | 8                | 0              | 9.472702                | -0.842128 | 0.393402  |
| 52               | 8                | 0              | 11.093142               | 0.141913  | -0.672226 |
| 53               | 8                | 0              | 9.465144                | -0.779214 | -1.785361 |

## Optimized geometric parameters for 1e- CN<sup>-</sup> in B3LYP/SDD (gas phase)

Standard orientation:

| Center<br>Number | Atomic<br>Number | Atomic<br>Type | Coordinates (Angstroms) |           |           |
|------------------|------------------|----------------|-------------------------|-----------|-----------|
|                  |                  |                | X                       | Y         | Z         |
| 1                | 6                | 0              | -7.175318               | -0.341248 | -0.016565 |
| 2                | 6                | 0              | -5.960893               | 0.334996  | -0.019536 |
| 3                | 6                | 0              | -7.241562               | -1.794326 | 0.005809  |
| 4                | 1                | 0              | -5.936040               | 1.422552  | -0.035828 |
| 5                | 6                | 0              | -4.708476               | -0.363839 | -0.001116 |
| 6                | 6                | 0              | -5.971585               | -2.471714 | 0.023866  |
| 7                | 1                | 0              | -6.007531               | -3.558350 | 0.040542  |
| 8                | 6                | 0              | -4.759016               | -1.789526 | 0.020487  |
| 9                | 1                | 0              | -3.831264               | -2.357836 | 0.035064  |
| 10               | 6                | 0              | -3.484482               | 0.395580  | -0.004498 |
| 11               | 1                | 0              | -3.582815               | 1.481837  | -0.020981 |
| 12               | 6                | 0              | -2.185336               | -0.076207 | 0.011137  |
| 13               | 1                | 0              | -1.972953               | -1.142371 | 0.028560  |
| 14               | 6                | 0              | -1.039123               | 0.790501  | 0.006126  |
| 15               | 8                | 0              | -1.259852               | 2.127169  | -0.026083 |
| 16               | 6                | 0              | 0.280955                | 0.294926  | 0.026394  |
| 17               | 1                | 0              | 0.433327                | -0.775952 | 0.051653  |
| 18               | 6                | 0              | 1.389948                | 1.171722  | 0.002735  |
| 19               | 8                | 0              | 1.174379                | 2.511093  | -0.024201 |
| 20               | 6                | 0              | 2.776298                | 0.792041  | -0.001951 |
| 21               | 1                | 0              | 3.461092                | 1.635916  | -0.017558 |
| 22               | 6                | 0              | 3.256684                | -0.506813 | 0.010830  |
| 23               | 1                | 0              | 2.522332                | -1.314707 | 0.024501  |
| 24               | 6                | 0              | 4.624807                | -0.945422 | 0.008519  |
| 25               | 6                | 0              | 5.743598                | -0.044532 | -0.009023 |
| 26               | 6                | 0              | 4.913289                | -2.343546 | 0.024152  |
| 27               | 1                | 0              | 5.552180                | 1.024179  | -0.020893 |
| 28               | 1                | 0              | 4.079502                | -3.046190 | 0.037626  |
| 29               | 6                | 0              | 7.046638                | -0.517869 | -0.010764 |
| 30               | 6                | 0              | 6.217992                | -2.826067 | 0.022799  |
| 31               | 1                | 0              | 6.426026                | -3.893200 | 0.034913  |
| 32               | 6                | 0              | 7.361340                | -1.949047 | 0.005351  |
| 33               | 8                | 0              | 8.189332                | 0.298469  | -0.027757 |
| 34               | 6                | 0              | 8.002459                | 1.735119  | -0.046012 |
| 35               | 1                | 0              | 7.452660                | 2.058090  | -0.943435 |
| 36               | 1                | 0              | 7.463096                | 2.082326  | 0.848663  |
| 37               | 1                | 0              | 9.009365                | 2.159723  | -0.057595 |
| 38               | 8                | 0              | 8.586391                | -2.391893 | 0.003866  |
| 39               | 1                | 0              | 10.011036               | -1.595428 | -0.012731 |
| 40               | 8                | 0              | -8.435826               | 0.277638  | -0.034086 |
| 41               | 6                | 0              | -8.489757               | 1.723205  | -0.058040 |
| 42               | 1                | 0              | -8.014720               | 2.160950  | 0.834013  |
| 43               | 1                | 0              | -8.002924               | 2.131550  | -0.957649 |
| 44               | 1                | 0              | -9.553595               | 1.973459  | -0.069093 |
| 45               | 8                | 0              | -8.370497               | -2.457880 | 0.009504  |
| 46               | 1                | 0              | -9.736612               | -2.041706 | -0.002975 |
| 47               | 5                | 0              | -0.175707               | 3.154846  | 0.026285  |
| 48               | 9                | 0              | -0.313016               | 4.038229  | -1.089955 |
| 49               | 9                | 0              | -0.292408               | 3.900692  | 1.245319  |
| 50               | 7                | 0              | -10.827244              | -1.866647 | -0.010028 |
| 51               | 6                | 0              | -12.006040              | -1.691406 | -0.017342 |
| 52               | 6                | 0              | 11.070961               | -1.210477 | -0.022607 |
| 53               | 7                | 0              | 12.184885               | -0.810843 | -0.032964 |

Optimized geometric parameters for **1e- CN<sup>-</sup>** in B3LYP/SDD (solvent phase)

Standard orientation:

| Center<br>Number | Atomic<br>Number | Atomic<br>Type | Coordinates (Angstroms) |           |           |
|------------------|------------------|----------------|-------------------------|-----------|-----------|
|                  |                  |                | X                       | Y         | Z         |
| 1                | 6                | 0              | 7.169386                | -0.341948 | 0.000578  |
| 2                | 6                | 0              | 5.947041                | 0.335321  | 0.000529  |
| 3                | 6                | 0              | 7.208308                | -1.776947 | -0.000128 |
| 4                | 1                | 0              | 5.926923                | 1.421388  | 0.001080  |
| 5                | 6                | 0              | 4.706199                | -0.368144 | -0.000189 |
| 6                | 6                | 0              | 5.966776                | -2.467517 | -0.000889 |
| 7                | 1                | 0              | 6.000001                | -3.553492 | -0.001452 |
| 8                | 6                | 0              | 4.745500                | -1.789025 | -0.000918 |
| 9                | 1                | 0              | 3.823674                | -2.363489 | -0.001531 |
| 10               | 6                | 0              | 3.474423                | 0.401821  | -0.000160 |
| 11               | 1                | 0              | 3.586489                | 1.485813  | 0.000184  |
| 12               | 6                | 0              | 2.187540                | -0.080751 | -0.000473 |
| 13               | 1                | 0              | 1.981112                | -1.147283 | -0.000740 |
| 14               | 6                | 0              | 1.029444                | 0.778668  | -0.000417 |
| 15               | 8                | 0              | 1.254942                | 2.127108  | -0.000026 |
| 16               | 6                | 0              | -0.278921               | 0.284195  | -0.000635 |
| 17               | 1                | 0              | -0.426454               | -0.786959 | -0.000881 |
| 18               | 6                | 0              | -1.399589               | 1.158843  | -0.000382 |
| 19               | 8                | 0              | -1.171812               | 2.508699  | -0.000045 |
| 20               | 6                | 0              | -2.772365               | 0.786998  | -0.000266 |
| 21               | 1                | 0              | -3.466762               | 1.622685  | -0.000036 |
| 22               | 6                | 0              | -3.244347               | -0.523827 | -0.000377 |
| 23               | 1                | 0              | -2.510360               | -1.329822 | -0.000590 |
| 24               | 6                | 0              | -4.606726               | -0.953470 | -0.000215 |
| 25               | 6                | 0              | -5.723940               | -0.046686 | 0.000063  |
| 26               | 6                | 0              | -4.887829               | -2.357175 | -0.000271 |
| 27               | 1                | 0              | -5.538390               | 1.021885  | 0.000119  |
| 28               | 1                | 0              | -4.054693               | -3.057783 | -0.000474 |
| 29               | 6                | 0              | -7.025489               | -0.520163 | 0.000246  |
| 30               | 6                | 0              | -6.190636               | -2.837973 | -0.000085 |
| 31               | 1                | 0              | -6.392456               | -3.905930 | -0.000115 |
| 32               | 6                | 0              | -7.326873               | -1.953869 | 0.000159  |
| 33               | 8                | 0              | -8.167444               | 0.286944  | 0.000483  |
| 34               | 6                | 0              | -7.989677               | 1.739024  | 0.000774  |
| 35               | 1                | 0              | -7.450349               | 2.068737  | 0.898320  |
| 36               | 1                | 0              | -7.450664               | 2.069151  | -0.896810 |
| 37               | 1                | 0              | -8.997940               | 2.156567  | 0.001036  |
| 38               | 8                | 0              | -8.557150               | -2.398142 | 0.000422  |
| 39               | 1                | 0              | -9.954028               | -1.578813 | 0.000504  |
| 40               | 8                | 0              | 8.421644                | 0.280131  | 0.001294  |
| 41               | 6                | 0              | 8.476126                | 1.741376  | 0.002333  |
| 42               | 1                | 0              | 7.997893                | 2.154950  | -0.895046 |
| 43               | 1                | 0              | 7.997152                | 2.153688  | 0.899897  |
| 44               | 1                | 0              | 9.538243                | 1.991988  | 0.002941  |
| 45               | 8                | 0              | 8.351582                | -2.494241 | -0.000086 |
| 46               | 1                | 0              | 9.384580                | -2.073445 | 0.000000  |
| 47               | 5                | 0              | 0.169883                | 3.126726  | -0.000610 |
| 48               | 9                | 0              | 0.301964                | 3.975390  | 1.163117  |
| 49               | 9                | 0              | 0.301727                | 3.973818  | -1.165561 |
| 50               | 7                | 0              | 10.740619               | -1.843106 | -0.000065 |
| 51               | 6                | 0              | 11.924208               | -1.663031 | -0.000161 |
| 52               | 6                | 0              | -11.008201              | -1.178238 | 0.000576  |
| 53               | 7                | 0              | -12.113883              | -0.759067 | 0.000657  |

Optimized geometric parameters for **1e- CN<sup>-</sup>** in B3LYP/6-311++G\*\* (solvent phase)

Standard orientation:

| Center<br>Number | Atomic<br>Number | Atomic<br>Type | Coordinates (Angstroms) |           |           |
|------------------|------------------|----------------|-------------------------|-----------|-----------|
|                  |                  |                | X                       | Y         | Z         |
| 1                | 6                | 0              | -7.090443               | -0.354062 | -0.052524 |
| 2                | 6                | 0              | -5.884364               | 0.334347  | -0.064816 |
| 3                | 6                | 0              | -7.092865               | -1.764413 | 0.065046  |
| 4                | 1                | 0              | -5.881210               | 1.412991  | -0.154016 |
| 5                | 6                | 0              | -4.647267               | -0.339347 | 0.038292  |
| 6                | 6                | 0              | -5.866769               | -2.431194 | 0.168210  |
| 7                | 1                | 0              | -5.883065               | -3.511319 | 0.257802  |
| 8                | 6                | 0              | -4.665068               | -1.739772 | 0.155679  |
| 9                | 1                | 0              | -3.739867               | -2.296505 | 0.238135  |
| 10               | 6                | 0              | -3.428770               | 0.450313  | 0.019931  |
| 11               | 1                | 0              | -3.567504               | 1.523717  | -0.072599 |
| 12               | 6                | 0              | -2.153194               | 0.001403  | 0.105146  |
| 13               | 1                | 0              | -1.931499               | -1.055229 | 0.199660  |
| 14               | 6                | 0              | -1.004086               | 0.875597  | 0.071866  |
| 15               | 8                | 0              | -1.231562               | 2.175927  | -0.071030 |
| 16               | 6                | 0              | 0.284805                | 0.379763  | 0.158998  |
| 17               | 1                | 0              | 0.426078                | -0.683505 | 0.275185  |
| 18               | 6                | 0              | 1.398816                | 1.240017  | 0.029212  |
| 19               | 8                | 0              | 1.187803                | 2.545889  | -0.099025 |
| 20               | 6                | 0              | 2.757239                | 0.841698  | -0.006026 |
| 21               | 1                | 0              | 3.462688                | 1.660241  | -0.094203 |
| 22               | 6                | 0              | 3.204961                | -0.461860 | 0.059246  |
| 23               | 1                | 0              | 2.459773                | -1.249595 | 0.132078  |
| 24               | 6                | 0              | 4.544762                | -0.924148 | 0.041880  |
| 25               | 6                | 0              | 5.677939                | -0.056523 | -0.041602 |
| 26               | 6                | 0              | 4.790325                | -2.320390 | 0.109530  |
| 27               | 1                | 0              | 5.517963                | 1.011833  | -0.092133 |
| 28               | 1                | 0              | 3.942212                | -2.995184 | 0.173582  |
| 29               | 6                | 0              | 6.955896                | -0.554048 | -0.055491 |
| 30               | 6                | 0              | 6.066737                | -2.831089 | 0.095659  |
| 31               | 1                | 0              | 6.238714                | -3.900652 | 0.147717  |
| 32               | 6                | 0              | 7.220989                | -1.988930 | 0.012654  |
| 33               | 8                | 0              | 8.088881                | 0.203666  | -0.131211 |
| 34               | 6                | 0              | 7.949243                | 1.621423  | -0.206093 |
| 35               | 1                | 0              | 7.392021                | 1.916951  | -1.100640 |
| 36               | 1                | 0              | 7.447892                | 2.017030  | 0.682790  |
| 37               | 1                | 0              | 8.960657                | 2.019723  | -0.260044 |
| 38               | 8                | 0              | 8.406189                | -2.445376 | -0.001057 |
| 39               | 1                | 0              | 9.912811                | -1.576397 | -0.088672 |
| 40               | 8                | 0              | -8.322366               | 0.222169  | -0.146070 |
| 41               | 6                | 0              | -8.405444               | 1.642527  | -0.270635 |
| 42               | 1                | 0              | -7.971485               | 2.140730  | 0.601246  |
| 43               | 1                | 0              | -7.904893               | 1.988437  | -1.179754 |
| 44               | 1                | 0              | -9.467138               | 1.872611  | -0.329939 |
| 45               | 8                | 0              | -8.218005               | -2.499690 | 0.085208  |
| 46               | 1                | 0              | -9.082996               | -2.011088 | -0.012705 |
| 47               | 5                | 0              | -0.142743               | 3.152053  | 0.103545  |
| 48               | 9                | 0              | -0.308893               | 4.184164  | -0.830578 |
| 49               | 9                | 0              | -0.206044               | 3.689037  | 1.410350  |
| 50               | 7                | 0              | -10.843135              | -1.848167 | -0.149067 |
| 51               | 6                | 0              | -12.004290              | -1.743660 | -0.265582 |
| 52               | 6                | 0              | 10.953566               | -1.199243 | -0.136545 |
| 53               | 7                | 0              | 12.036441               | -0.808264 | -0.186062 |



Optimized geometric parameters for **1e- F<sup>-</sup>** in B3LYP/SDD (gas phase)

Standard orientation:

| Center<br>Number | Atomic<br>Number | Atomic<br>Type | Coordinates (Angstroms) |           |           |
|------------------|------------------|----------------|-------------------------|-----------|-----------|
|                  |                  |                | X                       | Y         | Z         |
| 1                | 6                | 0              | -7.160968               | -0.425791 | -0.000380 |
| 2                | 6                | 0              | -5.952194               | 0.258908  | -0.000408 |
| 3                | 6                | 0              | -7.216740               | -1.882481 | -0.000023 |
| 4                | 1                | 0              | -5.935508               | 1.346829  | -0.000638 |
| 5                | 6                | 0              | -4.692228               | -0.429063 | -0.000121 |
| 6                | 6                | 0              | -5.937235               | -2.548097 | 0.000268  |
| 7                | 1                | 0              | -5.964145               | -3.635259 | 0.000528  |
| 8                | 6                | 0              | -4.731467               | -1.856464 | 0.000230  |
| 9                | 1                | 0              | -3.798678               | -2.416883 | 0.000456  |
| 10               | 6                | 0              | -3.476846               | 0.339346  | -0.000123 |
| 11               | 1                | 0              | -3.584299               | 1.424922  | -0.000313 |
| 12               | 6                | 0              | -2.171163               | -0.120503 | 0.000221  |
| 13               | 1                | 0              | -1.948976               | -1.184793 | 0.000497  |
| 14               | 6                | 0              | -1.035040               | 0.755918  | 0.000282  |
| 15               | 8                | 0              | -1.266812               | 2.091628  | -0.000296 |
| 16               | 6                | 0              | 0.291804                | 0.273023  | 0.000725  |
| 17               | 1                | 0              | 0.454446                | -0.796681 | 0.001160  |
| 18               | 6                | 0              | 1.390859                | 1.159649  | 0.000349  |
| 19               | 8                | 0              | 1.164288                | 2.498092  | -0.000105 |
| 20               | 6                | 0              | 2.782638                | 0.793454  | 0.000273  |
| 21               | 1                | 0              | 3.458686                | 1.644563  | 0.000035  |
| 22               | 6                | 0              | 3.276152                | -0.499266 | 0.000482  |
| 23               | 1                | 0              | 2.550464                | -1.315124 | 0.000699  |
| 24               | 6                | 0              | 4.650365                | -0.924196 | 0.000479  |
| 25               | 6                | 0              | 5.759604                | -0.012985 | 0.000202  |
| 26               | 6                | 0              | 4.952602                | -2.318435 | 0.000780  |
| 27               | 1                | 0              | 5.558751                | 1.054087  | 0.000001  |
| 28               | 1                | 0              | 4.126970                | -3.030709 | 0.000986  |
| 29               | 6                | 0              | 7.069411                | -0.471681 | 0.000215  |
| 30               | 6                | 0              | 6.263475                | -2.786309 | 0.000826  |
| 31               | 1                | 0              | 6.484120                | -3.850804 | 0.001064  |
| 32               | 6                | 0              | 7.395180                | -1.898033 | 0.000549  |
| 33               | 8                | 0              | 8.200637                | 0.354118  | -0.000066 |
| 34               | 6                | 0              | 8.004587                | 1.787640  | -0.000800 |
| 35               | 1                | 0              | 7.457689                | 2.120537  | -0.896894 |
| 36               | 1                | 0              | 7.457976                | 2.121492  | 0.895115  |
| 37               | 1                | 0              | 9.009544                | 2.216826  | -0.001193 |
| 38               | 8                | 0              | 8.620676                | -2.345737 | 0.000642  |
| 39               | 1                | 0              | 9.907267                | -1.690240 | -0.001222 |
| 40               | 8                | 0              | -8.424904               | 0.184256  | -0.000722 |
| 41               | 6                | 0              | -8.486988               | 1.628680  | -0.000664 |
| 42               | 1                | 0              | -8.008618               | 2.055684  | 0.895183  |
| 43               | 1                | 0              | -8.008391               | 2.055787  | -0.896341 |
| 44               | 1                | 0              | -9.552448               | 1.872696  | -0.000813 |
| 45               | 8                | 0              | -8.334950               | -2.556589 | 0.000159  |
| 46               | 1                | 0              | -9.718594               | -2.155692 | -0.002281 |
| 47               | 5                | 0              | -0.191992               | 3.129454  | 0.001056  |
| 48               | 9                | 0              | -0.327225               | 3.947819  | -1.167091 |
| 49               | 9                | 0              | -0.326832               | 3.944429  | 1.171719  |
| 50               | 9                | 0              | -10.729902              | -2.061942 | -0.004095 |
| 51               | 9                | 0              | 10.882557               | -1.411477 | -0.002575 |

Optimized geometric parameters for **1e- F<sup>-</sup>** in B3LYP/SDD (solvent phase)

Standard orientation:

| Center<br>Number | Atomic<br>Number | Atomic<br>Type | Coordinates (Angstroms) |           |           |
|------------------|------------------|----------------|-------------------------|-----------|-----------|
|                  |                  |                | X                       | Y         | Z         |
| 1                | 6                | 0              | -7.151474               | -0.427963 | -0.024524 |
| 2                | 6                | 0              | -5.943721               | 0.264457  | -0.027971 |
| 3                | 6                | 0              | -7.183204               | -1.876407 | -0.011694 |
| 4                | 1                | 0              | -5.935689               | 1.351035  | -0.035300 |
| 5                | 6                | 0              | -4.686763               | -0.422281 | -0.022791 |
| 6                | 6                | 0              | -5.915413               | -2.544022 | -0.011816 |
| 7                | 1                | 0              | -5.930791               | -3.630898 | -0.005272 |
| 8                | 6                | 0              | -4.709254               | -1.848263 | -0.016718 |
| 9                | 1                | 0              | -3.777658               | -2.407603 | -0.014003 |
| 10               | 6                | 0              | -3.472789               | 0.354692  | -0.021917 |
| 11               | 1                | 0              | -3.593830               | 1.437998  | -0.022475 |
| 12               | 6                | 0              | -2.172053               | -0.114096 | -0.018924 |
| 13               | 1                | 0              | -1.955488               | -1.178380 | -0.019813 |
| 14               | 6                | 0              | -1.031524               | 0.752240  | -0.013163 |
| 15               | 8                | 0              | -1.259895               | 2.100138  | -0.009060 |
| 16               | 6                | 0              | 0.290684                | 0.269334  | -0.010925 |
| 17               | 1                | 0              | 0.447283                | -0.800582 | -0.014363 |
| 18               | 6                | 0              | 1.394687                | 1.149168  | -0.003630 |
| 19               | 8                | 0              | 1.164637                | 2.498604  | 0.002968  |
| 20               | 6                | 0              | 2.781292                | 0.789137  | -0.001729 |
| 21               | 1                | 0              | 3.464012                | 1.634534  | 0.008817  |
| 22               | 6                | 0              | 3.264141                | -0.508592 | -0.013319 |
| 23               | 1                | 0              | 2.540562                | -1.323927 | -0.026386 |
| 24               | 6                | 0              | 4.639993                | -0.928662 | -0.011198 |
| 25               | 6                | 0              | 5.744390                | -0.014247 | 0.008596  |
| 26               | 6                | 0              | 4.931943                | -2.324335 | -0.029555 |
| 27               | 1                | 0              | 5.550946                | 1.052772  | 0.023403  |
| 28               | 1                | 0              | 4.108440                | -3.035766 | -0.044345 |
| 29               | 6                | 0              | 7.055039                | -0.475365 | 0.009603  |
| 30               | 6                | 0              | 6.244898                | -2.790971 | -0.029470 |
| 31               | 1                | 0              | 6.458277                | -3.856259 | -0.044093 |
| 32               | 6                | 0              | 7.361501                | -1.897688 | -0.010287 |
| 33               | 8                | 0              | 8.185546                | 0.346499  | 0.029162  |
| 34               | 6                | 0              | 7.992254                | 1.795440  | 0.056484  |
| 35               | 1                | 0              | 7.455284                | 2.138490  | -0.837540 |
| 36               | 1                | 0              | 7.444412                | 2.102931  | 0.956871  |
| 37               | 1                | 0              | 8.996210                | 2.223158  | 0.070981  |
| 38               | 8                | 0              | 8.600546                | -2.359316 | -0.010597 |
| 39               | 1                | 0              | 9.754633                | -1.708129 | 0.004227  |
| 40               | 8                | 0              | -8.414610               | 0.176756  | -0.033627 |
| 41               | 6                | 0              | -8.484593               | 1.636501  | -0.043089 |
| 42               | 1                | 0              | -8.013364               | 2.060977  | 0.853244  |
| 43               | 1                | 0              | -8.006205               | 2.049750  | -0.940878 |
| 44               | 1                | 0              | -9.549089               | 1.877662  | -0.048880 |
| 45               | 8                | 0              | -8.309438               | -2.574390 | -0.002038 |
| 46               | 1                | 0              | -9.559432               | -2.173594 | 0.077414  |
| 47               | 5                | 0              | -0.181910               | 3.107161  | 0.004639  |
| 48               | 9                | 0              | -0.315951               | 3.965591  | -1.151469 |
| 49               | 9                | 0              | -0.323480               | 3.942228  | 1.177120  |
| 50               | 9                | 0              | -10.616326              | -2.063513 | 0.149975  |
| 51               | 9                | 0              | 10.764262               | -1.387059 | 0.014258  |

Optimized geometric parameters for **1e- F** in B3LYP/6-311++G\*\* (solvent phase)

Standard orientation:

| Center<br>Number | Atomic<br>Number | Atomic<br>Type | Coordinates (Angstroms) |           |           |
|------------------|------------------|----------------|-------------------------|-----------|-----------|
|                  |                  |                | X                       | Y         | Z         |
| 1                | 6                | 0              | -7.088130               | -0.441193 | -0.088040 |
| 2                | 6                | 0              | -5.891163               | 0.246465  | -0.096327 |
| 3                | 6                | 0              | -7.114312               | -1.877823 | 0.007496  |
| 4                | 1                | 0              | -5.887657               | 1.327142  | -0.166615 |
| 5                | 6                | 0              | -4.639474               | -0.422172 | -0.013208 |
| 6                | 6                | 0              | -5.850114               | -2.525614 | 0.084789  |
| 7                | 1                | 0              | -5.856552               | -3.608185 | 0.153782  |
| 8                | 6                | 0              | -4.657808               | -1.831103 | 0.075809  |
| 9                | 1                | 0              | -3.727312               | -2.383631 | 0.139169  |
| 10               | 6                | 0              | -3.438047               | 0.361333  | -0.019966 |
| 11               | 1                | 0              | -3.580279               | 1.435975  | -0.098666 |
| 12               | 6                | 0              | -2.145133               | -0.074357 | 0.063509  |
| 13               | 1                | 0              | -1.911802               | -1.129106 | 0.148712  |
| 14               | 6                | 0              | -1.020285               | 0.808954  | 0.043205  |
| 15               | 8                | 0              | -1.252906               | 2.109632  | -0.095619 |
| 16               | 6                | 0              | 0.288711                | 0.333568  | 0.136858  |
| 17               | 1                | 0              | 0.446916                | -0.727870 | 0.249682  |
| 18               | 6                | 0              | 1.378228                | 1.204983  | 0.015159  |
| 19               | 8                | 0              | 1.160758                | 2.511168  | -0.107587 |
| 20               | 6                | 0              | 2.757088                | 0.828560  | -0.015770 |
| 21               | 1                | 0              | 3.444091                | 1.664625  | -0.086367 |
| 22               | 6                | 0              | 3.226546                | -0.456681 | 0.033057  |
| 23               | 1                | 0              | 2.498696                | -1.262091 | 0.088077  |
| 24               | 6                | 0              | 4.587165                | -0.896892 | 0.018954  |
| 25               | 6                | 0              | 5.698328                | -0.009294 | -0.039661 |
| 26               | 6                | 0              | 4.858457                | -2.282230 | 0.063929  |
| 27               | 1                | 0              | 5.519689                | 1.056606  | -0.073204 |
| 28               | 1                | 0              | 4.027922                | -2.979626 | 0.109204  |
| 29               | 6                | 0              | 6.992594                | -0.479352 | -0.051788 |
| 30               | 6                | 0              | 6.152650                | -2.762997 | 0.051774  |
| 31               | 1                | 0              | 6.347936                | -3.829076 | 0.087016  |
| 32               | 6                | 0              | 7.277734                | -1.898703 | -0.006289 |
| 33               | 8                | 0              | 8.104014                | 0.311040  | -0.105276 |
| 34               | 6                | 0              | 7.928626                | 1.725175  | -0.151363 |
| 35               | 1                | 0              | 7.371702                | 2.027052  | -1.044136 |
| 36               | 1                | 0              | 7.410841                | 2.090010  | 0.741411  |
| 37               | 1                | 0              | 8.930384                | 2.149278  | -0.188336 |
| 38               | 8                | 0              | 8.478785                | -2.367362 | -0.016415 |
| 39               | 1                | 0              | 9.685668                | -1.715429 | -0.056429 |
| 40               | 8                | 0              | -8.321344               | 0.146022  | -0.167743 |
| 41               | 6                | 0              | -8.388181               | 1.565892  | -0.266958 |
| 42               | 1                | 0              | -7.945704               | 2.047825  | 0.610904  |
| 43               | 1                | 0              | -7.885729               | 1.926045  | -1.170569 |
| 44               | 1                | 0              | -9.447155               | 1.812605  | -0.319362 |
| 45               | 8                | 0              | -8.210484               | -2.564603 | 0.021158  |
| 46               | 1                | 0              | -9.497199               | -2.143561 | 0.030883  |
| 47               | 5                | 0              | -0.178296               | 3.096524  | 0.097669  |
| 48               | 9                | 0              | -0.354985               | 4.140252  | -0.822212 |
| 49               | 9                | 0              | -0.253820               | 3.615031  | 1.412147  |
| 50               | 9                | 0              | -10.523667              | -2.019560 | 0.053736  |
| 51               | 9                | 0              | 10.665313               | -1.414334 | -0.081744 |

Optimized geometric parameters for **1e- Cl** in B3LYP/SDD (gas phase)

Standard orientation:

| Center<br>Number | Atomic<br>Number | Atomic<br>Type | Coordinates (Angstroms) |           |           |
|------------------|------------------|----------------|-------------------------|-----------|-----------|
|                  |                  |                | X                       | Y         | Z         |
| 1                | 6                | 0              | 7.159240                | -0.203631 | -0.421673 |
| 2                | 6                | 0              | 5.938237                | 0.473970  | -0.348575 |
| 3                | 6                | 0              | 7.185349                | -1.636999 | -0.383471 |
| 4                | 1                | 0              | 5.960988                | 1.560976  | -0.400560 |
| 5                | 6                | 0              | 4.690676                | -0.201761 | -0.244030 |
| 6                | 6                | 0              | 5.930711                | -2.314125 | -0.291110 |
| 7                | 1                | 0              | 5.967144                | -3.399736 | -0.272672 |
| 8                | 6                | 0              | 4.723362                | -1.627744 | -0.220962 |
| 9                | 1                | 0              | 3.796944                | -2.191944 | -0.145878 |
| 10               | 6                | 0              | 3.469946                | 0.575411  | -0.180111 |
| 11               | 1                | 0              | 3.579001                | 1.659909  | -0.207376 |
| 12               | 6                | 0              | 2.179697                | 0.105809  | -0.087470 |
| 13               | 1                | 0              | 1.966052                | -0.959392 | -0.055730 |
| 14               | 6                | 0              | 1.033178                | 0.978063  | -0.026860 |
| 15               | 8                | 0              | 1.251893                | 2.306296  | -0.069659 |
| 16               | 6                | 0              | -0.282481               | 0.477905  | 0.065170  |
| 17               | 1                | 0              | -0.432554               | -0.592615 | 0.097077  |
| 18               | 6                | 0              | -1.386161               | 1.357729  | 0.101034  |
| 19               | 8                | 0              | -1.178172               | 2.688503  | 0.068064  |
| 20               | 6                | 0              | -2.779789               | 0.974645  | 0.165475  |
| 21               | 1                | 0              | -3.465462               | 1.817156  | 0.193847  |
| 22               | 6                | 0              | -3.246358               | -0.318422 | 0.188451  |
| 23               | 1                | 0              | -2.511951               | -1.125191 | 0.152360  |
| 24               | 6                | 0              | -4.623881               | -0.765066 | 0.253080  |
| 25               | 6                | 0              | -5.739417               | 0.116818  | 0.321615  |
| 26               | 6                | 0              | -4.897330               | -2.163172 | 0.264728  |
| 27               | 1                | 0              | -5.595290               | 1.193631  | 0.352652  |
| 28               | 1                | 0              | -4.066573               | -2.866440 | 0.219580  |
| 29               | 6                | 0              | -7.052720               | -0.351702 | 0.387614  |
| 30               | 6                | 0              | -6.202858               | -2.644485 | 0.330146  |
| 31               | 1                | 0              | -6.415508               | -3.709484 | 0.337571  |
| 32               | 6                | 0              | -7.322513               | -1.765303 | 0.382176  |
| 33               | 8                | 0              | -8.090535               | 0.575479  | 0.562990  |
| 34               | 6                | 0              | -8.720266               | 1.107148  | -0.663768 |
| 35               | 1                | 0              | -7.944261               | 1.475573  | -1.352483 |
| 36               | 1                | 0              | -9.355915               | 0.339492  | -1.122128 |
| 37               | 1                | 0              | -9.350283               | 1.934480  | -0.326567 |
| 38               | 8                | 0              | -8.541181               | -2.331719 | 0.468036  |
| 39               | 1                | 0              | -9.421281               | -1.830241 | 0.174682  |
| 40               | 8                | 0              | 8.330242                | 0.541123  | -0.633977 |
| 41               | 6                | 0              | 9.078540                | 0.955157  | 0.570765  |
| 42               | 1                | 0              | 8.398388                | 1.447797  | 1.283004  |
| 43               | 1                | 0              | 9.590554                | 0.091111  | 1.012052  |
| 44               | 1                | 0              | 9.828754                | 1.665035  | 0.211868  |
| 45               | 8                | 0              | 8.284002                | -2.412636 | -0.467684 |
| 46               | 1                | 0              | 9.247279                | -2.061205 | -0.228364 |
| 47               | 5                | 0              | 0.175508                | 3.346212  | 0.051343  |
| 48               | 9                | 0              | 0.354751                | 4.062809  | 1.270647  |
| 49               | 9                | 0              | 0.248396                | 4.223651  | -1.064548 |
| 50               | 17               | 0              | 11.004043               | -1.884291 | 0.456285  |
| 51               | 17               | 0              | -11.083033              | -1.379002 | -0.599229 |

Optimized geometric parameters for **1e- Cl** in B3LYP/SDD (solvent phase)

Standard orientation:

| Center<br>Number | Atomic<br>Number | Atomic<br>Type | Coordinates (Angstroms) |           |           |
|------------------|------------------|----------------|-------------------------|-----------|-----------|
|                  |                  |                | X                       | Y         | Z         |
| 1                | 6                | 0              | 7.158781                | -0.267130 | -0.053555 |
| 2                | 6                | 0              | 5.938659                | 0.415181  | -0.050839 |
| 3                | 6                | 0              | 7.178394                | -1.695306 | -0.068796 |
| 4                | 1                | 0              | 5.921457                | 1.500820  | -0.036261 |
| 5                | 6                | 0              | 4.699699                | -0.289272 | -0.068239 |
| 6                | 6                | 0              | 5.949753                | -2.393484 | -0.092688 |
| 7                | 1                | 0              | 5.982859                | -3.478715 | -0.107553 |
| 8                | 6                | 0              | 4.730810                | -1.710188 | -0.092493 |
| 9                | 1                | 0              | 3.807715                | -2.281026 | -0.108890 |
| 10               | 6                | 0              | 3.469425                | 0.482348  | -0.058512 |
| 11               | 1                | 0              | 3.581406                | 1.566072  | -0.041348 |
| 12               | 6                | 0              | 2.183276                | -0.003163 | -0.065631 |
| 13               | 1                | 0              | 1.976297                | -1.068780 | -0.081521 |
| 14               | 6                | 0              | 1.029928                | 0.857902  | -0.048711 |
| 15               | 8                | 0              | 1.246923                | 2.198755  | -0.028095 |
| 16               | 6                | 0              | -0.284541               | 0.357472  | -0.050496 |
| 17               | 1                | 0              | -0.431096               | -0.713260 | -0.066306 |
| 18               | 6                | 0              | -1.391997               | 1.231282  | -0.028300 |
| 19               | 8                | 0              | -1.178902               | 2.573435  | -0.006021 |
| 20               | 6                | 0              | -2.783123               | 0.858055  | -0.023594 |
| 21               | 1                | 0              | -3.468412               | 1.700617  | 0.002835  |
| 22               | 6                | 0              | -3.250487               | -0.435740 | -0.049947 |
| 23               | 1                | 0              | -2.526243               | -1.249146 | -0.080039 |
| 24               | 6                | 0              | -4.636816               | -0.863221 | -0.043062 |
| 25               | 6                | 0              | -5.734013               | 0.047925  | 0.002848  |
| 26               | 6                | 0              | -4.915844               | -2.255432 | -0.082895 |
| 27               | 1                | 0              | -5.548411               | 1.115343  | 0.033789  |
| 28               | 1                | 0              | -4.093068               | -2.965087 | -0.117651 |
| 29               | 6                | 0              | -7.048196               | -0.419990 | 0.009007  |
| 30               | 6                | 0              | -6.233409               | -2.726327 | -0.078052 |
| 31               | 1                | 0              | -6.449091               | -3.789664 | -0.108459 |
| 32               | 6                | 0              | -7.318866               | -1.827455 | -0.031713 |
| 33               | 8                | 0              | -8.184678               | 0.382230  | 0.052766  |
| 34               | 6                | 0              | -8.024415               | 1.836153  | 0.112439  |
| 35               | 1                | 0              | -7.476603               | 2.131767  | 1.015990  |
| 36               | 1                | 0              | -7.504038               | 2.208984  | -0.778568 |
| 37               | 1                | 0              | -9.038467               | 2.236734  | 0.144998  |
| 38               | 8                | 0              | -8.583247               | -2.344312 | -0.028814 |
| 39               | 1                | 0              | -9.389144               | -1.719231 | 0.021457  |
| 40               | 8                | 0              | 8.416078                | 0.333665  | -0.045040 |
| 41               | 6                | 0              | 8.499529                | 1.794440  | -0.002609 |
| 42               | 1                | 0              | 8.031116                | 2.239648  | -0.889334 |
| 43               | 1                | 0              | 8.025776                | 2.187238  | 0.905819  |
| 44               | 1                | 0              | 9.566008                | 2.023216  | 0.006877  |
| 45               | 8                | 0              | 8.332529                | -2.430040 | -0.068941 |
| 46               | 1                | 0              | 9.231178                | -1.956329 | 0.024871  |
| 47               | 5                | 0              | 0.163374                | 3.206847  | -0.003509 |
| 48               | 9                | 0              | 0.297447                | 4.021992  | 1.175323  |
| 49               | 9                | 0              | 0.282582                | 4.063405  | -1.154201 |
| 50               | 17               | 0              | 11.249592               | -1.821899 | 0.253175  |
| 51               | 17               | 0              | -11.362844              | -1.246700 | 0.115939  |

Optimized geometric parameters for **1e- Cl** in B3LYP/6-311++G\*\* (solvent phase)

Standard orientation:

| Center<br>Number | Atomic<br>Number | Atomic<br>Type | Coordinates (Angstroms) |           |           |
|------------------|------------------|----------------|-------------------------|-----------|-----------|
|                  |                  |                | X                       | Y         | Z         |
| 1                | 6                | 0              | 7.089512                | -0.271354 | -0.055654 |
| 2                | 6                | 0              | 5.882704                | 0.412318  | -0.060743 |
| 3                | 6                | 0              | 7.093397                | -1.682816 | 0.028699  |
| 4                | 1                | 0              | 5.873578                | 1.492597  | -0.124549 |
| 5                | 6                | 0              | 4.649755                | -0.274229 | 0.017572  |
| 6                | 6                | 0              | 5.875593                | -2.364753 | 0.105823  |
| 7                | 1                | 0              | 5.898307                | -3.446299 | 0.169198  |
| 8                | 6                | 0              | 4.671942                | -1.678099 | 0.100879  |
| 9                | 1                | 0              | 3.748469                | -2.239825 | 0.162266  |
| 10               | 6                | 0              | 3.430516                | 0.506894  | 0.010383  |
| 11               | 1                | 0              | 3.563441                | 1.582609  | -0.060830 |
| 12               | 6                | 0              | 2.154338                | 0.050500  | 0.084197  |
| 13               | 1                | 0              | 1.932990                | -1.007112 | 0.159879  |
| 14               | 6                | 0              | 1.012222                | 0.926743  | 0.066503  |
| 15               | 8                | 0              | 1.232113                | 2.221816  | -0.050793 |
| 16               | 6                | 0              | -0.286614               | 0.425992  | 0.144582  |
| 17               | 1                | 0              | -0.430432               | -0.638790 | 0.238196  |
| 18               | 6                | 0              | -1.381950               | 1.289298  | 0.034316  |
| 19               | 8                | 0              | -1.189706               | 2.589733  | -0.068414 |
| 20               | 6                | 0              | -2.765816               | 0.892846  | -0.002003 |
| 21               | 1                | 0              | -3.458621               | 1.723364  | -0.076050 |
| 22               | 6                | 0              | -3.212405               | -0.388729 | 0.051561  |
| 23               | 1                | 0              | -2.481418               | -1.189293 | 0.118815  |
| 24               | 6                | 0              | -4.585107               | -0.841804 | 0.030992  |
| 25               | 6                | 0              | -5.688690               | 0.039939  | -0.053341 |
| 26               | 6                | 0              | -4.837239               | -2.223105 | 0.099464  |
| 27               | 1                | 0              | -5.522265               | 1.106302  | -0.108216 |
| 28               | 1                | 0              | -4.005278               | -2.915000 | 0.163324  |
| 29               | 6                | 0              | -6.984216               | -0.444836 | -0.066433 |
| 30               | 6                | 0              | -6.135530               | -2.714090 | 0.088760  |
| 31               | 1                | 0              | -6.330732               | -3.778311 | 0.143344  |
| 32               | 6                | 0              | -7.221446               | -1.843554 | 0.008176  |
| 33               | 8                | 0              | -8.110631               | 0.311719  | -0.147378 |
| 34               | 6                | 0              | -7.981069               | 1.733342  | -0.233337 |
| 35               | 1                | 0              | -7.485957               | 2.135420  | 0.654896  |
| 36               | 1                | 0              | -7.426148               | 2.021464  | -1.130530 |
| 37               | 1                | 0              | -8.996655               | 2.118223  | -0.291868 |
| 38               | 8                | 0              | -8.462017               | -2.361402 | 0.001518  |
| 39               | 1                | 0              | -9.187698               | -1.695078 | -0.037360 |
| 40               | 8                | 0              | 8.322942                | 0.300386  | -0.126517 |
| 41               | 6                | 0              | 8.415572                | 1.724272  | -0.218850 |
| 42               | 1                | 0              | 7.922476                | 2.090941  | -1.123456 |
| 43               | 1                | 0              | 7.978585                | 2.203042  | 0.661883  |
| 44               | 1                | 0              | 9.478796                | 1.948419  | -0.266300 |
| 45               | 8                | 0              | 8.231276                | -2.404340 | 0.037554  |
| 46               | 1                | 0              | 9.055384                | -1.869631 | -0.020139 |
| 47               | 5                | 0              | 0.146307                | 3.212678  | 0.095785  |
| 48               | 9                | 0              | 0.218933                | 3.789258  | 1.376183  |
| 49               | 9                | 0              | 0.299725                | 4.197972  | -0.882017 |
| 50               | 17               | 0              | 11.330492               | -1.836547 | -0.085216 |
| 51               | 17               | 0              | -11.382898              | -1.251891 | -0.056899 |

Optimized geometric parameters for **1e- Br** in B3LYP/SDD (gas phase)

Standard orientation:

| Center<br>Number | Atomic<br>Number | Atomic<br>Type | Coordinates (Angstroms) |           |           |
|------------------|------------------|----------------|-------------------------|-----------|-----------|
|                  |                  |                | X                       | Y         | Z         |
| 1                | 6                | 0              | -7.161450               | -0.073280 | 0.005859  |
| 2                | 6                | 0              | -5.938249               | 0.599907  | 0.003127  |
| 3                | 6                | 0              | -7.201406               | -1.505767 | -0.010901 |
| 4                | 1                | 0              | -5.915445               | 1.686759  | 0.016152  |
| 5                | 6                | 0              | -4.700278               | -0.111165 | -0.017380 |
| 6                | 6                | 0              | -5.971649               | -2.208063 | -0.031930 |
| 7                | 1                | 0              | -6.021144               | -3.292714 | -0.044515 |
| 8                | 6                | 0              | -4.749603               | -1.532038 | -0.035193 |
| 9                | 1                | 0              | -3.828035               | -2.107670 | -0.051142 |
| 10               | 6                | 0              | -3.464087               | 0.646328  | -0.019074 |
| 11               | 1                | 0              | -3.556568               | 1.732710  | -0.003493 |
| 12               | 6                | 0              | -2.177779               | 0.160015  | -0.037881 |
| 13               | 1                | 0              | -1.974013               | -0.907323 | -0.054375 |
| 14               | 6                | 0              | -1.021509               | 1.022529  | -0.036242 |
| 15               | 8                | 0              | -1.232835               | 2.351858  | -0.014450 |
| 16               | 6                | 0              | 0.292885                | 0.511984  | -0.054770 |
| 17               | 1                | 0              | 0.437097                | -0.559671 | -0.071123 |
| 18               | 6                | 0              | 1.402437                | 1.384849  | -0.047537 |
| 19               | 8                | 0              | 1.203610                | 2.716563  | -0.024969 |
| 20               | 6                | 0              | 2.795103                | 0.992989  | -0.059939 |
| 21               | 1                | 0              | 3.483801                | 1.833325  | -0.044411 |
| 22               | 6                | 0              | 3.256807                | -0.301255 | -0.089719 |
| 23               | 1                | 0              | 2.520437                | -1.106304 | -0.107195 |
| 24               | 6                | 0              | 4.635636                | -0.750096 | -0.102557 |
| 25               | 6                | 0              | 5.750429                | 0.142598  | -0.081148 |
| 26               | 6                | 0              | 4.899776                | -2.145228 | -0.140168 |
| 27               | 1                | 0              | 5.580972                | 1.214290  | -0.056752 |
| 28               | 1                | 0              | 4.063899                | -2.842590 | -0.157530 |
| 29               | 6                | 0              | 7.055893                | -0.346301 | -0.095234 |
| 30               | 6                | 0              | 6.208559                | -2.639007 | -0.151939 |
| 31               | 1                | 0              | 6.415093                | -3.704416 | -0.175577 |
| 32               | 6                | 0              | 7.314846                | -1.760979 | -0.125755 |
| 33               | 8                | 0              | 8.210272                | 0.415670  | -0.088037 |
| 34               | 6                | 0              | 8.138138                | 1.857691  | 0.039850  |
| 35               | 1                | 0              | 7.625994                | 2.309219  | -0.823176 |
| 36               | 1                | 0              | 7.623635                | 2.147971  | 0.967997  |
| 37               | 1                | 0              | 9.179917                | 2.180544  | 0.071384  |
| 38               | 8                | 0              | 8.559768                | -2.287974 | -0.133902 |
| 39               | 1                | 0              | 9.378616                | -1.675161 | -0.051664 |
| 40               | 8                | 0              | -8.416543               | 0.513189  | 0.022858  |
| 41               | 6                | 0              | -8.546672               | 1.955747  | 0.053489  |
| 42               | 1                | 0              | -8.080968               | 2.378916  | 0.956401  |
| 43               | 1                | 0              | -8.099435               | 2.415562  | -0.840868 |
| 44               | 1                | 0              | -9.623208               | 2.133412  | 0.068332  |
| 45               | 8                | 0              | -8.348986               | -2.222738 | -0.008287 |
| 46               | 1                | 0              | -9.253496               | -1.741725 | 0.015669  |
| 47               | 5                | 0              | -0.144534               | 3.386990  | -0.015005 |
| 48               | 9                | 0              | -0.267872               | 4.191220  | -1.182501 |
| 49               | 9                | 0              | -0.256164               | 4.180036  | 1.160585  |
| 50               | 35               | 0              | -11.445001              | -1.362184 | 0.072169  |
| 51               | 35               | 0              | 11.467076               | -0.971321 | 0.180479  |

Optimized geometric parameters for **1e- Br** in B3LYP/SDD (solvent phase)

Standard orientation:

| Center<br>Number | Atomic<br>Number | Atomic<br>Type | Coordinates (Angstroms) |           |           |
|------------------|------------------|----------------|-------------------------|-----------|-----------|
|                  |                  |                | X                       | Y         | Z         |
| 1                | 6                | 0              | 7.157612                | 0.014351  | 0.004152  |
| 2                | 6                | 0              | 5.933918                | 0.689863  | -0.000305 |
| 3                | 6                | 0              | 7.183042                | -1.407973 | 0.066870  |
| 4                | 1                | 0              | 5.907406                | 1.774259  | -0.047692 |
| 5                | 6                | 0              | 4.703953                | -0.027359 | 0.055163  |
| 6                | 6                | 0              | 5.970579                | -2.122540 | 0.124144  |
| 7                | 1                | 0              | 6.013088                | -3.206224 | 0.172177  |
| 8                | 6                | 0              | 4.746062                | -1.446375 | 0.118068  |
| 9                | 1                | 0              | 3.827966                | -2.023092 | 0.164014  |
| 10               | 6                | 0              | 3.464125                | 0.733351  | 0.044521  |
| 11               | 1                | 0              | 3.565094                | 1.817686  | 0.011357  |
| 12               | 6                | 0              | 2.185445                | 0.233161  | 0.068832  |
| 13               | 1                | 0              | 1.990664                | -0.834392 | 0.096834  |
| 14               | 6                | 0              | 1.020576                | 1.080970  | 0.053881  |
| 15               | 8                | 0              | 1.220501                | 2.422610  | 0.025826  |
| 16               | 6                | 0              | -0.286638               | 0.562653  | 0.065376  |
| 17               | 1                | 0              | -0.419371               | -0.509671 | 0.086882  |
| 18               | 6                | 0              | -1.404641               | 1.422689  | 0.045967  |
| 19               | 8                | 0              | -1.210018               | 2.765675  | 0.020877  |
| 20               | 6                | 0              | -2.792275               | 1.030764  | 0.047613  |
| 21               | 1                | 0              | -3.487966               | 1.864959  | 0.032038  |
| 22               | 6                | 0              | -3.240949               | -0.268127 | 0.062687  |
| 23               | 1                | 0              | -2.506620               | -1.072734 | 0.076769  |
| 24               | 6                | 0              | -4.624006               | -0.714065 | 0.059153  |
| 25               | 6                | 0              | -5.731395               | 0.185194  | 0.041568  |
| 26               | 6                | 0              | -4.881244               | -2.110396 | 0.071445  |
| 27               | 1                | 0              | -5.561233               | 1.255560  | 0.033714  |
| 28               | 1                | 0              | -4.047693               | -2.807653 | 0.085430  |
| 29               | 6                | 0              | -7.036872               | -0.305395 | 0.034786  |
| 30               | 6                | 0              | -6.192509               | -2.603575 | 0.064145  |
| 31               | 1                | 0              | -6.392553               | -3.670147 | 0.072012  |
| 32               | 6                | 0              | -7.279808               | -1.713800 | 0.044200  |
| 33               | 8                | 0              | -8.196372               | 0.464725  | 0.018852  |
| 34               | 6                | 0              | -8.078788               | 1.925425  | 0.000732  |
| 35               | 1                | 0              | -7.562122               | 2.283665  | 0.899377  |
| 36               | 1                | 0              | -7.548079               | 2.260167  | -0.898823 |
| 37               | 1                | 0              | -9.104483               | 2.295888  | -0.012023 |
| 38               | 8                | 0              | -8.555229               | -2.230098 | 0.035570  |
| 39               | 1                | 0              | -9.294265               | -1.561923 | 0.002297  |
| 40               | 8                | 0              | 8.417321                | 0.607986  | -0.048570 |
| 41               | 6                | 0              | 8.507674                | 2.068810  | -0.123395 |
| 42               | 1                | 0              | 8.016080                | 2.441989  | -1.030080 |
| 43               | 1                | 0              | 8.060626                | 2.531215  | 0.765023  |
| 44               | 1                | 0              | 9.574905                | 2.290580  | -0.160870 |
| 45               | 8                | 0              | 8.362927                | -2.120144 | 0.075087  |
| 46               | 1                | 0              | 9.196499                | -1.578496 | 0.019122  |
| 47               | 5                | 0              | 0.124329                | 3.418813  | 0.008815  |
| 48               | 9                | 0              | 0.239768                | 4.274707  | 1.158781  |
| 49               | 9                | 0              | 0.239035                | 4.232872  | -1.171109 |
| 50               | 35               | 0              | 11.676233               | -1.587093 | -0.087984 |
| 51               | 35               | 0              | -11.716663              | -1.151927 | -0.112571 |



Optimized geometric parameters for **1e-Br** in B3LYP/6-311++G\*\* (solvent phase)

Standard orientation:

| Center<br>Number | Atomic<br>Number | Atomic<br>Type | Coordinates (Angstroms) |           |           |
|------------------|------------------|----------------|-------------------------|-----------|-----------|
|                  |                  |                | X                       | Y         | Z         |
| 1                | 6                | 0              | -7.097453               | -0.008801 | -0.014704 |
| 2                | 6                | 0              | -5.886019               | 0.666497  | -0.010473 |
| 3                | 6                | 0              | -7.110294               | -1.420607 | -0.075726 |
| 4                | 1                | 0              | -5.868979               | 1.747569  | 0.035979  |
| 5                | 6                | 0              | -4.658349               | -0.031682 | -0.065107 |
| 6                | 6                | 0              | -5.899362               | -2.114621 | -0.132598 |
| 7                | 1                | 0              | -5.929841               | -3.196756 | -0.179830 |
| 8                | 6                | 0              | -4.690600               | -1.436311 | -0.127358 |
| 9                | 1                | 0              | -3.770995               | -2.005738 | -0.173026 |
| 10               | 6                | 0              | -3.431921               | 0.739158  | -0.053205 |
| 11               | 1                | 0              | -3.556030               | 1.817668  | -0.017134 |
| 12               | 6                | 0              | -2.159533               | 0.268368  | -0.078594 |
| 13               | 1                | 0              | -1.947749               | -0.793366 | -0.110439 |
| 14               | 6                | 0              | -1.007763               | 1.132928  | -0.059715 |
| 15               | 8                | 0              | -1.217388               | 2.433107  | -0.026780 |
| 16               | 6                | 0              | 0.285731                | 0.613824  | -0.073212 |
| 17               | 1                | 0              | 0.418194                | -0.456114 | -0.099671 |
| 18               | 6                | 0              | 1.389784                | 1.471593  | -0.048317 |
| 19               | 8                | 0              | 1.213647                | 2.776838  | -0.017082 |
| 20               | 6                | 0              | 2.771830                | 1.064269  | -0.051141 |
| 21               | 1                | 0              | 3.472897                | 1.890907  | -0.030838 |
| 22               | 6                | 0              | 3.206203                | -0.221916 | -0.072235 |
| 23               | 1                | 0              | 2.467761                | -1.018240 | -0.090973 |
| 24               | 6                | 0              | 4.575958                | -0.686505 | -0.070338 |
| 25               | 6                | 0              | 5.688143                | 0.187991  | -0.046408 |
| 26               | 6                | 0              | 4.813992                | -2.071648 | -0.090791 |
| 27               | 1                | 0              | 5.532367                | 1.257326  | -0.031980 |
| 28               | 1                | 0              | 3.974560                | -2.757099 | -0.109406 |
| 29               | 6                | 0              | 6.978731                | -0.309585 | -0.041649 |
| 30               | 6                | 0              | 6.107877                | -2.575561 | -0.085735 |
| 31               | 1                | 0              | 6.292175                | -3.642977 | -0.099882 |
| 32               | 6                | 0              | 7.200354                | -1.711737 | -0.059788 |
| 33               | 8                | 0              | 8.116175                | 0.434907  | -0.020441 |
| 34               | 6                | 0              | 8.007659                | 1.861011  | 0.007639  |
| 35               | 1                | 0              | 7.495511                | 2.230973  | -0.884723 |
| 36               | 1                | 0              | 7.479551                | 2.194358  | 0.905144  |
| 37               | 1                | 0              | 9.029572                | 2.232841  | 0.024230  |
| 38               | 8                | 0              | 8.441088                | -2.235374 | -0.055044 |
| 39               | 1                | 0              | 9.153249                | -1.561095 | -0.011583 |
| 40               | 8                | 0              | -8.329113               | 0.569500  | 0.035386  |
| 41               | 6                | 0              | -8.416279               | 1.995279  | 0.109657  |
| 42               | 1                | 0              | -7.928600               | 2.370126  | 1.013720  |
| 43               | 1                | 0              | -7.969965               | 2.460864  | -0.773352 |
| 44               | 1                | 0              | -9.478769               | 2.224846  | 0.145774  |
| 45               | 8                | 0              | -8.258847               | -2.128842 | -0.083338 |
| 46               | 1                | 0              | -9.063563               | -1.571893 | -0.021007 |
| 47               | 5                | 0              | -0.121175               | 3.423048  | -0.002966 |
| 48               | 9                | 0              | -0.228843               | 4.247820  | -1.131343 |
| 49               | 9                | 0              | -0.230637               | 4.193508  | 1.163018  |
| 50               | 35               | 0              | -11.560873              | -1.573139 | 0.108965  |
| 51               | 35               | 0              | 11.595250               | -1.163550 | 0.131490  |

Optimized geometric parameters for **1e- AcO<sup>-</sup>** in B3LYP/SDD (gas phase)

Standard orientation:

| Center<br>Number | Atomic<br>Number | Atomic<br>Type | Coordinates (Angstroms) |           |           |
|------------------|------------------|----------------|-------------------------|-----------|-----------|
|                  |                  |                | X                       | Y         | Z         |
| 1                | 6                | 0              | 7.164030                | -0.142392 | 0.197372  |
| 2                | 6                | 0              | 5.946394                | 0.526785  | 0.160945  |
| 3                | 6                | 0              | 7.237554                | -1.592832 | 0.276414  |
| 4                | 1                | 0              | 5.916313                | 1.612828  | 0.105377  |
| 5                | 6                | 0              | 4.698117                | -0.177488 | 0.191376  |
| 6                | 6                | 0              | 5.970699                | -2.276326 | 0.297759  |
| 7                | 1                | 0              | 6.012511                | -3.361214 | 0.355982  |
| 8                | 6                | 0              | 4.755195                | -1.601799 | 0.258698  |
| 9                | 1                | 0              | 3.830405                | -2.174308 | 0.283625  |
| 10               | 6                | 0              | 3.470962                | 0.574880  | 0.150010  |
| 11               | 1                | 0              | 3.563715                | 1.660663  | 0.102196  |
| 12               | 6                | 0              | 2.174490                | 0.095709  | 0.162028  |
| 13               | 1                | 0              | 1.967224                | -0.970487 | 0.207486  |
| 14               | 6                | 0              | 1.025472                | 0.956455  | 0.115539  |
| 15               | 8                | 0              | 1.239249                | 2.292241  | 0.070046  |
| 16               | 6                | 0              | -0.293556               | 0.454140  | 0.124090  |
| 17               | 1                | 0              | -0.441446               | -0.616951 | 0.160437  |
| 18               | 6                | 0              | -1.403628               | 1.326534  | 0.099839  |
| 19               | 8                | 0              | -1.196457               | 2.664684  | 0.050116  |
| 20               | 6                | 0              | -2.791467               | 0.941384  | 0.129289  |
| 21               | 1                | 0              | -3.478762               | 1.782899  | 0.101310  |
| 22               | 6                | 0              | -3.264191               | -0.355695 | 0.186014  |
| 23               | 1                | 0              | -2.527171               | -1.160628 | 0.212979  |
| 24               | 6                | 0              | -4.633760               | -0.800947 | 0.213186  |
| 25               | 6                | 0              | -5.754870               | 0.092387  | 0.182166  |
| 26               | 6                | 0              | -4.913153               | -2.197758 | 0.270253  |
| 27               | 1                | 0              | -5.571126               | 1.161307  | 0.132762  |
| 28               | 1                | 0              | -4.077208               | -2.897088 | 0.293391  |
| 29               | 6                | 0              | -7.057457               | -0.387138 | 0.210027  |
| 30               | 6                | 0              | -6.217276               | -2.684871 | 0.300780  |
| 31               | 1                | 0              | -6.421872               | -3.751110 | 0.351510  |
| 32               | 6                | 0              | -7.358957               | -1.813945 | 0.279860  |
| 33               | 8                | 0              | -8.201284               | 0.426560  | 0.165885  |
| 34               | 6                | 0              | -8.026313               | 1.864022  | 0.244881  |
| 35               | 1                | 0              | -7.490524               | 2.149710  | 1.162235  |
| 36               | 1                | 0              | -7.480082               | 2.253829  | -0.627780 |
| 37               | 1                | 0              | -9.036813               | 2.279318  | 0.263009  |
| 38               | 8                | 0              | -8.581231               | -2.281670 | 0.318087  |
| 39               | 1                | 0              | -9.880827               | -1.658128 | 0.492916  |
| 40               | 8                | 0              | 8.420346                | 0.489551  | 0.152499  |
| 41               | 6                | 0              | 8.464435                | 1.935283  | 0.243826  |
| 42               | 1                | 0              | 7.988051                | 2.412065  | -0.626998 |
| 43               | 1                | 0              | 7.973636                | 2.292270  | 1.161662  |
| 44               | 1                | 0              | 9.526253                | 2.192859  | 0.269059  |
| 45               | 8                | 0              | 8.368933                | -2.252849 | 0.322599  |
| 46               | 1                | 0              | 9.741684                | -1.834140 | 0.497557  |
| 47               | 5                | 0              | 0.151192                | 3.311874  | -0.051198 |
| 48               | 9                | 0              | 0.287756                | 4.269027  | 0.999457  |
| 49               | 9                | 0              | 0.259694                | 3.966082  | -1.320866 |
| 50               | 8                | 0              | 10.782949               | -1.693432 | 0.632407  |
| 51               | 8                | 0              | 12.724402               | -1.135197 | -0.424452 |
| 52               | 6                | 0              | 11.489522               | -1.351950 | -0.463992 |
| 53               | 6                | 0              | 10.683295               | -1.244106 | -1.760915 |
| 54               | 1                | 0              | 9.908398                | -0.477899 | -1.642069 |
| 55               | 1                | 0              | 11.348016               | -0.993534 | -2.591863 |
| 56               | 1                | 0              | 10.163618               | -2.189017 | -1.961884 |
| 57               | 8                | 0              | -10.887656              | -1.365421 | 0.624022  |
| 58               | 8                | 0              | -12.724597              | -0.540889 | -0.444752 |
| 59               | 6                | 0              | -11.533103              | -0.930168 | -0.477649 |
| 60               | 6                | 0              | -10.712052              | -0.939966 | -1.769687 |
| 61               | 1                | 0              | -10.325374              | -1.947898 | -1.963800 |
| 62               | 1                | 0              | -11.331014              | -0.603886 | -2.605681 |
| 63               | 1                | 0              | -9.840142               | -0.286608 | -1.649061 |

-----

Optimized geometric parameters for **1e- AcO<sup>-</sup>** in B3LYP/SDD (solvent phase)

Standard orientation:

| Center<br>Number | Atomic<br>Number | Atomic<br>Type | Coordinates (Angstroms) |           |           |
|------------------|------------------|----------------|-------------------------|-----------|-----------|
|                  |                  |                | X                       | Y         | Z         |
| 1                | 6                | 0              | -7.154100               | -0.146291 | -0.263577 |
| 2                | 6                | 0              | -5.935760               | 0.526144  | -0.218297 |
| 3                | 6                | 0              | -7.208711               | -1.586842 | -0.394287 |
| 4                | 1                | 0              | -5.910835               | 1.608004  | -0.120640 |
| 5                | 6                | 0              | -4.690878               | -0.176634 | -0.297613 |
| 6                | 6                | 0              | -5.953475               | -2.271384 | -0.471704 |
| 7                | 1                | 0              | -5.986167               | -3.353306 | -0.570752 |
| 8                | 6                | 0              | -4.735990               | -1.596112 | -0.426006 |
| 9                | 1                | 0              | -3.813651               | -2.166833 | -0.490676 |
| 10               | 6                | 0              | -3.464340               | 0.580029  | -0.242328 |
| 11               | 1                | 0              | -3.569337               | 1.661090  | -0.150249 |
| 12               | 6                | 0              | -2.171639               | 0.093802  | -0.289613 |
| 13               | 1                | 0              | -1.970910               | -0.969914 | -0.377661 |
| 14               | 6                | 0              | -1.017699               | 0.940562  | -0.221089 |
| 15               | 8                | 0              | -1.226017               | 2.287652  | -0.120089 |
| 16               | 6                | 0              | 0.296669                | 0.438583  | -0.255075 |
| 17               | 1                | 0              | 0.437627                | -0.630453 | -0.336066 |
| 18               | 6                | 0              | 1.413873                | 1.299390  | -0.188478 |
| 19               | 8                | 0              | 1.204190                | 2.647232  | -0.079441 |
| 20               | 6                | 0              | 2.795015                | 0.920728  | -0.221707 |
| 21               | 1                | 0              | 3.489058                | 1.754111  | -0.154141 |
| 22               | 6                | 0              | 3.260546                | -0.378944 | -0.325987 |
| 23               | 1                | 0              | 2.526732                | -1.182524 | -0.391796 |
| 24               | 6                | 0              | 4.631610                | -0.814408 | -0.356910 |
| 25               | 6                | 0              | 5.746193                | 0.084266  | -0.282509 |
| 26               | 6                | 0              | 4.907366                | -2.209258 | -0.464935 |
| 27               | 1                | 0              | 5.565006                | 1.150387  | -0.201030 |
| 28               | 1                | 0              | 4.075781                | -2.908983 | -0.521934 |
| 29               | 6                | 0              | 7.051333                | -0.391053 | -0.314543 |
| 30               | 6                | 0              | 6.215009                | -2.689814 | -0.497344 |
| 31               | 1                | 0              | 6.416498                | -3.754209 | -0.580577 |
| 32               | 6                | 0              | 7.341580                | -1.812158 | -0.425150 |
| 33               | 8                | 0              | 8.190780                | 0.416835  | -0.243353 |
| 34               | 6                | 0              | 8.012867                | 1.865786  | -0.151290 |
| 35               | 1                | 0              | 7.481596                | 2.252402  | -1.030611 |
| 36               | 1                | 0              | 7.466719                | 2.138628  | 0.760990  |
| 37               | 1                | 0              | 9.021335                | 2.281378  | -0.116550 |
| 38               | 8                | 0              | 8.576030                | -2.286757 | -0.457470 |
| 39               | 1                | 0              | 9.765337                | -1.656842 | -0.358194 |
| 40               | 8                | 0              | -8.407941               | 0.474040  | -0.185583 |
| 41               | 6                | 0              | -8.455829               | 1.931271  | -0.075340 |
| 42               | 1                | 0              | -7.959975               | 2.274902  | 0.841853  |
| 43               | 1                | 0              | -7.989737               | 2.407369  | -0.947897 |
| 44               | 1                | 0              | -9.516517               | 2.185996  | -0.038933 |
| 45               | 8                | 0              | -8.349133               | -2.264226 | -0.440166 |
| 46               | 1                | 0              | -9.597589               | -1.830610 | -0.374757 |
| 47               | 5                | 0              | -0.132762               | 3.270803  | 0.007856  |
| 48               | 9                | 0              | -0.259388               | 4.264393  | -1.032769 |
| 49               | 9                | 0              | -0.254252               | 3.958824  | 1.275249  |
| 50               | 8                | 0              | -10.699226              | -1.673170 | -0.406597 |
| 51               | 8                | 0              | -12.579714              | -1.089557 | 0.722829  |
| 52               | 6                | 0              | -11.339156              | -1.322815 | 0.719930  |
| 53               | 6                | 0              | -10.490965              | -1.230805 | 1.982448  |
| 54               | 1                | 0              | -9.660543               | -0.535829 | 1.816431  |
| 55               | 1                | 0              | -11.097461              | -0.894944 | 2.826332  |
| 56               | 1                | 0              | -10.057470              | -2.211352 | 2.215642  |
| 57               | 8                | 0              | 10.816016               | -1.337785 | -0.354341 |
| 58               | 8                | 0              | 12.536493               | -0.479603 | 0.850516  |
| 59               | 6                | 0              | 11.347835               | -0.896921 | 0.799335  |
| 60               | 6                | 0              | 10.441042               | -0.936893 | 2.022360  |

|    |   |   |           |           |          |
|----|---|---|-----------|-----------|----------|
| 61 | 1 | 0 | 10.135494 | -1.969739 | 2.230210 |
| 62 | 1 | 0 | 10.958140 | -0.530449 | 2.894066 |
| 63 | 1 | 0 | 9.531252  | -0.359911 | 1.823148 |

Optimized geometric parameters for **1e-AcO<sup>-</sup>** in B3LYP/6-311++G\*\* (solvent phase)

Standard orientation:

| Center<br>Number | Atomic<br>Number | Atomic<br>Type | Coordinates (Angstroms) |           |           |
|------------------|------------------|----------------|-------------------------|-----------|-----------|
|                  |                  |                | X                       | Y         | Z         |
| 1                | 6                | 0              | 7.086664                | -0.164440 | 0.321039  |
| 2                | 6                | 0              | 5.885581                | 0.510862  | 0.275331  |
| 3                | 6                | 0              | 7.132412                | -1.608047 | 0.317433  |
| 4                | 1                | 0              | 5.870383                | 1.593941  | 0.279168  |
| 5                | 6                | 0              | 4.639377                | -0.175124 | 0.223926  |
| 6                | 6                | 0              | 5.870542                | -2.271026 | 0.265271  |
| 7                | 1                | 0              | 5.885983                | -3.355916 | 0.263115  |
| 8                | 6                | 0              | 4.673529                | -1.587820 | 0.220990  |
| 9                | 1                | 0              | 3.748164                | -2.151589 | 0.183602  |
| 10               | 6                | 0              | 3.430685                | 0.591709  | 0.178346  |
| 11               | 1                | 0              | 3.559358                | 1.670995  | 0.188834  |
| 12               | 6                | 0              | 2.141228                | 0.136025  | 0.123614  |
| 13               | 1                | 0              | 1.921867                | -0.925084 | 0.108430  |
| 14               | 6                | 0              | 1.005598                | 1.002158  | 0.090346  |
| 15               | 8                | 0              | 1.219127                | 2.314250  | 0.142094  |
| 16               | 6                | 0              | -0.298043               | 0.504449  | 0.037102  |
| 17               | 1                | 0              | -0.441682               | -0.564312 | -0.004422 |
| 18               | 6                | 0              | -1.399742               | 1.365517  | 0.117503  |
| 19               | 8                | 0              | -1.198021               | 2.681536  | 0.156888  |
| 20               | 6                | 0              | -2.770975               | 0.973030  | 0.190923  |
| 21               | 1                | 0              | -3.469237               | 1.801923  | 0.228872  |
| 22               | 6                | 0              | -3.224075               | -0.320654 | 0.212834  |
| 23               | 1                | 0              | -2.485179               | -1.117490 | 0.183514  |
| 24               | 6                | 0              | -4.575470               | -0.778270 | 0.270366  |
| 25               | 6                | 0              | -5.700203               | 0.095848  | 0.310695  |
| 26               | 6                | 0              | -4.827906               | -2.169074 | 0.289974  |
| 27               | 1                | 0              | -5.535869               | 1.164684  | 0.297020  |
| 28               | 1                | 0              | -3.986739               | -2.854788 | 0.259577  |
| 29               | 6                | 0              | -6.984885               | -0.392502 | 0.366098  |
| 30               | 6                | 0              | -6.112633               | -2.669047 | 0.345951  |
| 31               | 1                | 0              | -6.290484               | -3.738843 | 0.360635  |
| 32               | 6                | 0              | -7.254605               | -1.819802 | 0.387159  |
| 33               | 8                | 0              | -8.109649               | 0.382810  | 0.407618  |
| 34               | 6                | 0              | -7.954557               | 1.800154  | 0.401860  |
| 35               | 1                | 0              | -7.384726               | 2.139914  | 1.272523  |
| 36               | 1                | 0              | -7.459422               | 2.141463  | -0.512840 |
| 37               | 1                | 0              | -8.961342               | 2.211769  | 0.444295  |
| 38               | 8                | 0              | -8.447300               | -2.288011 | 0.440302  |
| 39               | 1                | 0              | -9.800723               | -1.600857 | 0.407968  |
| 40               | 8                | 0              | 8.316841                | 0.436418  | 0.375318  |
| 41               | 6                | 0              | 8.371403                | 1.860140  | 0.399086  |
| 42               | 1                | 0              | 7.934358                | 2.291220  | -0.507564 |
| 43               | 1                | 0              | 7.856258                | 2.263422  | 1.276921  |
| 44               | 1                | 0              | 9.427715                | 2.118864  | 0.449059  |
| 45               | 8                | 0              | 8.237432                | -2.264940 | 0.359912  |
| 46               | 1                | 0              | 9.660938                | -1.790036 | 0.395478  |
| 47               | 5                | 0              | 0.127102                | 3.261317  | -0.130897 |
| 48               | 9                | 0              | 0.302923                | 4.396669  | 0.673824  |
| 49               | 9                | 0              | 0.173650                | 3.644286  | -1.494189 |
| 50               | 8                | 0              | 10.680322               | -1.668571 | 0.515629  |
| 51               | 8                | 0              | 12.535661               | -1.114885 | -0.552243 |
| 52               | 6                | 0              | 11.328580               | -1.309498 | -0.580256 |
| 53               | 6                | 0              | 10.506706               | -1.159636 | -1.841419 |
| 54               | 1                | 0              | 9.718221                | -0.421510 | -1.680587 |
| 55               | 1                | 0              | 11.145688               | -0.852735 | -2.667098 |
| 56               | 1                | 0              | 10.019970               | -2.107030 | -2.085700 |
| 57               | 8                | 0              | -10.790266              | -1.329953 | 0.479812  |

|    |   |   |            |           |           |
|----|---|---|------------|-----------|-----------|
| 58 | 8 | 0 | -12.496506 | -0.551376 | -0.690984 |
| 59 | 6 | 0 | -11.330749 | -0.916759 | -0.656507 |
| 60 | 6 | 0 | -10.439343 | -0.926398 | -1.878328 |
| 61 | 1 | 0 | -10.084579 | -1.941054 | -2.074861 |
| 62 | 1 | 0 | -10.988943 | -0.556936 | -2.741735 |
| 63 | 1 | 0 | -9.560487  | -0.304172 | -1.697225 |

Optimized geometric parameters for **1e- SCN<sup>-</sup>** in B3LYP/SDD (gas phase)

Standard orientation:

| Center<br>Number | Atomic<br>Number | Atomic<br>Type | Coordinates (Angstroms) |           |           |
|------------------|------------------|----------------|-------------------------|-----------|-----------|
|                  |                  |                | X                       | Y         | Z         |
| 1                | 6                | 0              | -7.160458               | -0.167544 | -0.012207 |
| 2                | 6                | 0              | -5.936108               | 0.499419  | -0.014917 |
| 3                | 6                | 0              | -7.219562               | -1.608226 | 0.007810  |
| 4                | 1                | 0              | -5.906462               | 1.586245  | -0.029566 |
| 5                | 6                | 0              | -4.695464               | -0.210846 | 0.001660  |
| 6                | 6                | 0              | -5.974258               | -2.303507 | 0.024012  |
| 7                | 1                | 0              | -6.024618               | -3.388578 | 0.038910  |
| 8                | 6                | 0              | -4.752346               | -1.632955 | 0.021047  |
| 9                | 1                | 0              | -3.831635               | -2.211041 | 0.034118  |
| 10               | 6                | 0              | -3.460897               | 0.542183  | -0.001302 |
| 11               | 1                | 0              | -3.550575               | 1.628956  | -0.016536 |
| 12               | 6                | 0              | -2.172170               | 0.055258  | 0.013505  |
| 13               | 1                | 0              | -1.970209               | -1.012619 | 0.029834  |
| 14               | 6                | 0              | -1.015635               | 0.913970  | 0.009431  |
| 15               | 8                | 0              | -1.224371               | 2.246944  | -0.020904 |
| 16               | 6                | 0              | 0.298174                | 0.402782  | 0.029309  |
| 17               | 1                | 0              | 0.440290                | -0.669203 | 0.052898  |
| 18               | 6                | 0              | 1.411878                | 1.271772  | 0.007390  |
| 19               | 8                | 0              | 1.212891                | 2.607197  | -0.018012 |
| 20               | 6                | 0              | 2.799769                | 0.877497  | 0.003418  |
| 21               | 1                | 0              | 3.491263                | 1.715647  | -0.012367 |
| 22               | 6                | 0              | 3.261725                | -0.421274 | 0.017755  |
| 23               | 1                | 0              | 2.521577                | -1.223265 | 0.032446  |
| 24               | 6                | 0              | 4.633129                | -0.874398 | 0.016203  |
| 25               | 6                | 0              | 5.755184                | 0.013609  | -0.003239 |
| 26               | 6                | 0              | 4.899955                | -2.271948 | 0.034752  |
| 27               | 1                | 0              | 5.581361                | 1.084844  | -0.017502 |
| 28               | 1                | 0              | 4.061931                | -2.967909 | 0.049681  |
| 29               | 6                | 0              | 7.058164                | -0.474352 | -0.004025 |
| 30               | 6                | 0              | 6.204428                | -2.766088 | 0.034486  |
| 31               | 1                | 0              | 6.407056                | -3.832981 | 0.048804  |
| 32               | 6                | 0              | 7.334181                | -1.897526 | 0.015296  |
| 33               | 8                | 0              | 8.207173                | 0.316721  | -0.022823 |
| 34               | 6                | 0              | 8.064736                | 1.759433  | -0.045965 |
| 35               | 1                | 0              | 7.527260                | 2.094142  | -0.946065 |
| 36               | 1                | 0              | 7.537942                | 2.124207  | 0.848728  |
| 37               | 1                | 0              | 9.085372                | 2.147078  | -0.058492 |
| 38               | 8                | 0              | 8.558528                | -2.404631 | 0.015513  |
| 39               | 1                | 0              | 9.587709                | -1.825280 | 0.001305  |
| 40               | 8                | 0              | -8.411604               | 0.452270  | -0.027680 |
| 41               | 6                | 0              | -8.476969               | 1.899668  | -0.049349 |
| 42               | 1                | 0              | -8.005909               | 2.336610  | 0.844418  |
| 43               | 1                | 0              | -7.995637               | 2.310099  | -0.950186 |
| 44               | 1                | 0              | -9.542975               | 2.136236  | -0.058897 |
| 45               | 8                | 0              | -8.353704               | -2.305300 | 0.011686  |
| 46               | 1                | 0              | -9.413307               | -1.883231 | 0.001481  |
| 47               | 5                | 0              | -0.132809               | 3.273595  | 0.026870  |
| 48               | 9                | 0              | -0.258112               | 4.140151  | -1.096541 |
| 49               | 9                | 0              | -0.241643               | 4.015387  | 1.241960  |
| 50               | 7                | 0              | -10.720082              | -1.616144 | -0.007609 |
| 51               | 6                | 0              | -11.887464              | -1.374201 | -0.015722 |
| 52               | 6                | 0              | 11.915689               | -1.000185 | -0.023968 |
| 53               | 7                | 0              | 10.791916               | -1.395413 | -0.011811 |
| 54               | 16               | 0              | 13.496919               | -0.441828 | -0.041137 |

55            16            0            -13.532345    -1.029280    -0.027281

---

### Optimized geometric parameters for **1e- SCN<sup>-</sup>** in B3LYP/SDD (solvent phase)

Standard orientation:

---

| Center<br>Number | Atomic<br>Number | Atomic<br>Type | Coordinates (Angstroms) |           |           |
|------------------|------------------|----------------|-------------------------|-----------|-----------|
|                  |                  |                | X                       | Y         | Z         |
| 1                | 6                | 0              | -7.155981               | -0.130627 | 0.000779  |
| 2                | 6                | 0              | -5.928691               | 0.538014  | 0.000747  |
| 3                | 6                | 0              | -7.194339               | -1.561171 | 0.001063  |
| 4                | 1                | 0              | -5.900132               | 1.623553  | 0.000544  |
| 5                | 6                | 0              | -4.695545               | -0.177764 | 0.000939  |
| 6                | 6                | 0              | -5.967735               | -2.268312 | 0.001305  |
| 7                | 1                | 0              | -6.011836               | -3.353331 | 0.001534  |
| 8                | 6                | 0              | -4.742165               | -1.598855 | 0.001246  |
| 9                | 1                | 0              | -3.825062               | -2.179710 | 0.001467  |
| 10               | 6                | 0              | -3.458413               | 0.580449  | 0.000827  |
| 11               | 1                | 0              | -3.558713               | 1.665532  | 0.000933  |
| 12               | 6                | 0              | -2.176643               | 0.081101  | 0.000531  |
| 13               | 1                | 0              | -1.982177               | -0.987027 | 0.000292  |
| 14               | 6                | 0              | -1.013593               | 0.927671  | 0.000414  |
| 15               | 8                | 0              | -1.213625               | 2.272282  | 0.000994  |
| 16               | 6                | 0              | 0.294787                | 0.411431  | -0.000152 |
| 17               | 1                | 0              | 0.428009                | -0.661180 | -0.000583 |
| 18               | 6                | 0              | 1.413878                | 1.270769  | 0.000082  |
| 19               | 8                | 0              | 1.217382                | 2.616708  | 0.000530  |
| 20               | 6                | 0              | 2.799012                | 0.879430  | -0.000057 |
| 21               | 1                | 0              | 3.496345                | 1.712512  | 0.000155  |
| 22               | 6                | 0              | 3.248848                | -0.421966 | -0.000491 |
| 23               | 1                | 0              | 2.512277                | -1.224972 | -0.000718 |
| 24               | 6                | 0              | 4.626915                | -0.870168 | -0.000746 |
| 25               | 6                | 0              | 5.740163                | 0.023451  | -0.000364 |
| 26               | 6                | 0              | 4.884882                | -2.267488 | -0.001426 |
| 27               | 1                | 0              | 5.570223                | 1.093991  | 0.000193  |
| 28               | 1                | 0              | 4.050810                | -2.964886 | -0.001695 |
| 29               | 6                | 0              | 7.047095                | -0.463693 | -0.000712 |
| 30               | 6                | 0              | 6.194197                | -2.757685 | -0.001805 |
| 31               | 1                | 0              | 6.393100                | -3.824785 | -0.002361 |
| 32               | 6                | 0              | 7.299644                | -1.878100 | -0.001487 |
| 33               | 8                | 0              | 8.193767                | 0.328057  | -0.000366 |
| 34               | 6                | 0              | 8.042963                | 1.784541  | 0.000118  |
| 35               | 1                | 0              | 7.511354                | 2.122858  | -0.898159 |
| 36               | 1                | 0              | 7.511676                | 2.122289  | 0.898800  |
| 37               | 1                | 0              | 9.059733                | 2.179814  | 0.000066  |
| 38               | 8                | 0              | 8.546801                | -2.413046 | -0.001983 |
| 39               | 1                | 0              | 9.408561                | -1.825858 | -0.001086 |
| 40               | 8                | 0              | -8.405057               | 0.490399  | 0.000602  |
| 41               | 6                | 0              | -8.461889               | 1.953220  | -0.000419 |
| 42               | 1                | 0              | -7.984284               | 2.364902  | 0.897663  |
| 43               | 1                | 0              | -7.983729               | 2.363663  | -0.898771 |
| 44               | 1                | 0              | -9.524424               | 2.200666  | -0.000904 |
| 45               | 8                | 0              | -8.347081               | -2.282528 | 0.001130  |
| 46               | 1                | 0              | -9.283149               | -1.830110 | 0.000766  |
| 47               | 5                | 0              | -0.116810               | 3.265495  | -0.000367 |
| 48               | 9                | 0              | -0.233218               | 4.102756  | -1.166479 |
| 49               | 9                | 0              | -0.233222               | 4.105910  | 1.163361  |
| 50               | 7                | 0              | -10.818576              | -1.593674 | 0.000221  |
| 51               | 6                | 0              | -12.001147              | -1.423047 | -0.000320 |
| 52               | 6                | 0              | 12.027131               | -1.031942 | 0.000881  |
| 53               | 7                | 0              | 10.881568               | -1.371009 | -0.000031 |
| 54               | 16               | 0              | 13.646781               | -0.552325 | 0.002162  |
| 55               | 16               | 0              | -13.673360              | -1.181496 | -0.001072 |

---

Optimized geometric parameters for **1e- SCN<sup>-</sup>** in B3LYP/6-311++G\*\* (solvent phase)

Standard orientation:

| Center<br>Number | Atomic<br>Number | Atomic<br>Type | Coordinates (Angstroms) |           |           |
|------------------|------------------|----------------|-------------------------|-----------|-----------|
|                  |                  |                | X                       | Y         | Z         |
| 1                | 6                | 0              | -7.088677               | -0.167251 | -0.021195 |
| 2                | 6                | 0              | -5.876448               | 0.506838  | -0.033975 |
| 3                | 6                | 0              | -7.105325               | -1.577434 | 0.104346  |
| 4                | 1                | 0              | -5.859128               | 1.584695  | -0.129452 |
| 5                | 6                | 0              | -4.648043               | -0.184034 | 0.076601  |
| 6                | 6                | 0              | -5.889457               | -2.261941 | 0.214949  |
| 7                | 1                | 0              | -5.920345               | -3.340988 | 0.310596  |
| 8                | 6                | 0              | -4.681230               | -1.584848 | 0.201923  |
| 9                | 1                | 0              | -3.762464               | -2.150811 | 0.290230  |
| 10               | 6                | 0              | -3.423773               | 0.587323  | 0.057579  |
| 11               | 1                | 0              | -3.547832               | 1.662141  | -0.039650 |
| 12               | 6                | 0              | -2.151099               | 0.122389  | 0.147912  |
| 13               | 1                | 0              | -1.939755               | -0.935309 | 0.247347  |
| 14               | 6                | 0              | -1.000964               | 0.986340  | 0.115975  |
| 15               | 8                | 0              | -1.206477               | 2.281540  | -0.029615 |
| 16               | 6                | 0              | 0.292695                | 0.474270  | 0.208329  |
| 17               | 1                | 0              | 0.425247                | -0.589747 | 0.324735  |
| 18               | 6                | 0              | 1.397576                | 1.322813  | 0.080264  |
| 19               | 8                | 0              | 1.218920                | 2.623554  | -0.048522 |
| 20               | 6                | 0              | 2.776237                | 0.910113  | 0.049786  |
| 21               | 1                | 0              | 3.478991                | 1.730820  | -0.038692 |
| 22               | 6                | 0              | 3.207868                | -0.376277 | 0.122081  |
| 23               | 1                | 0              | 2.466763                | -1.166441 | 0.201735  |
| 24               | 6                | 0              | 4.573586                | -0.847303 | 0.105272  |
| 25               | 6                | 0              | 5.689498                | 0.017781  | 0.008556  |
| 26               | 6                | 0              | 4.808195                | -2.231095 | 0.188538  |
| 27               | 1                | 0              | 5.536205                | 1.085654  | -0.055297 |
| 28               | 1                | 0              | 3.967506                | -2.911385 | 0.262967  |
| 29               | 6                | 0              | 6.979134                | -0.482839 | -0.004265 |
| 30               | 6                | 0              | 6.099481                | -2.738277 | 0.176990  |
| 31               | 1                | 0              | 6.280975                | -3.804481 | 0.240912  |
| 32               | 6                | 0              | 7.200376                | -1.885436 | 0.080810  |
| 33               | 8                | 0              | 8.112037                | 0.263362  | -0.094120 |
| 34               | 6                | 0              | 7.992286                | 1.684345  | -0.195144 |
| 35               | 1                | 0              | 7.437572                | 1.967620  | -1.094169 |
| 36               | 1                | 0              | 7.501851                | 2.100562  | 0.689358  |
| 37               | 1                | 0              | 9.010189                | 2.062285  | -0.259801 |
| 38               | 8                | 0              | 8.427268                | -2.424213 | 0.073299  |
| 39               | 1                | 0              | 9.188225                | -1.790334 | -0.005234 |
| 40               | 8                | 0              | -8.315285               | 0.415310  | -0.121037 |
| 41               | 6                | 0              | -8.389630               | 1.836158  | -0.255735 |
| 42               | 1                | 0              | -7.954723               | 2.336520  | 0.614200  |
| 43               | 1                | 0              | -7.884421               | 2.171269  | -1.166099 |
| 44               | 1                | 0              | -9.449703               | 2.071649  | -0.319311 |
| 45               | 8                | 0              | -8.241141               | -2.293248 | 0.123394  |
| 46               | 1                | 0              | -9.084712               | -1.779169 | 0.029033  |
| 47               | 5                | 0              | -0.110256               | 3.261636  | 0.109472  |
| 48               | 9                | 0              | -0.252680               | 4.240621  | -0.876526 |
| 49               | 9                | 0              | -0.177760               | 3.850271  | 1.385346  |
| 50               | 7                | 0              | -10.873184              | -1.584167 | -0.093649 |
| 51               | 6                | 0              | -12.027279              | -1.384564 | -0.174538 |
| 52               | 6                | 0              | 12.044596               | -1.008432 | -0.192153 |
| 53               | 7                | 0              | 10.922747               | -1.346470 | -0.118281 |
| 54               | 16               | 0              | 13.626448               | -0.531931 | -0.296244 |
| 55               | 16               | 0              | -13.654720              | -1.102979 | -0.288210 |

Optimized geometric parameters for **1e- NO<sub>3</sub><sup>-</sup>** in B3LYP/SDD (gas phase)

Standard orientation:

| Center<br>Number | Atomic<br>Number | Atomic<br>Type | Coordinates (Angstroms) |           |           |
|------------------|------------------|----------------|-------------------------|-----------|-----------|
|                  |                  |                | X                       | Y         | Z         |
| 1                | 6                | 0              | -7.148864               | -0.257718 | -0.413767 |
| 2                | 6                | 0              | -5.929028               | 0.417733  | -0.349144 |
| 3                | 6                | 0              | -7.184165               | -1.692087 | -0.431638 |
| 4                | 1                | 0              | -5.916611               | 1.505105  | -0.324351 |
| 5                | 6                | 0              | -4.685380               | -0.281780 | -0.330942 |
| 6                | 6                | 0              | -5.942509               | -2.384350 | -0.431646 |
| 7                | 1                | 0              | -5.984830               | -3.469544 | -0.449889 |
| 8                | 6                | 0              | -4.726429               | -1.703989 | -0.382725 |
| 9                | 1                | 0              | -3.801119               | -2.274329 | -0.373494 |
| 10               | 6                | 0              | -3.455098               | 0.481353  | -0.281543 |
| 11               | 1                | 0              | -3.553658               | 1.566756  | -0.246602 |
| 12               | 6                | 0              | -2.165406               | 0.000869  | -0.281603 |
| 13               | 1                | 0              | -1.958128               | -1.065527 | -0.313828 |
| 14               | 6                | 0              | -1.011447               | 0.864351  | -0.247126 |
| 15               | 8                | 0              | -1.223920               | 2.194280  | -0.213102 |
| 16               | 6                | 0              | 0.303798                | 0.355434  | -0.254623 |
| 17               | 1                | 0              | 0.448583                | -0.715957 | -0.282113 |
| 18               | 6                | 0              | 1.413724                | 1.227991  | -0.233085 |
| 19               | 8                | 0              | 1.212956                | 2.560422  | -0.200295 |
| 20               | 6                | 0              | 2.805449                | 0.836577  | -0.248714 |
| 21               | 1                | 0              | 3.495353                | 1.675989  | -0.235219 |
| 22               | 6                | 0              | 3.266462                | -0.459145 | -0.281285 |
| 23               | 1                | 0              | 2.527582                | -1.262270 | -0.288161 |
| 24               | 6                | 0              | 4.641769                | -0.912435 | -0.313493 |
| 25               | 6                | 0              | 5.761752                | -0.026369 | -0.334845 |
| 26               | 6                | 0              | 4.901845                | -2.309937 | -0.343906 |
| 27               | 1                | 0              | 5.596746                | 1.046665  | -0.328315 |
| 28               | 1                | 0              | 4.063143                | -3.004570 | -0.331941 |
| 29               | 6                | 0              | 7.065573                | -0.516018 | -0.381866 |
| 30               | 6                | 0              | 6.207182                | -2.806372 | -0.374157 |
| 31               | 1                | 0              | 6.409682                | -3.873121 | -0.375481 |
| 32               | 6                | 0              | 7.324353                | -1.933931 | -0.377123 |
| 33               | 8                | 0              | 8.206568                | 0.272143  | -0.469867 |
| 34               | 6                | 0              | 8.164701                | 1.635769  | 0.035699  |
| 35               | 1                | 0              | 7.578312                | 2.289269  | -0.627935 |
| 36               | 1                | 0              | 7.751134                | 1.658386  | 1.052111  |
| 37               | 1                | 0              | 9.205074                | 1.964217  | 0.058742  |
| 38               | 8                | 0              | 8.560065                | -2.457114 | -0.378985 |
| 39               | 1                | 0              | 9.418451                | -1.853986 | -0.184243 |
| 40               | 8                | 0              | -8.392107               | 0.363378  | -0.511431 |
| 41               | 6                | 0              | -8.585227               | 1.649502  | 0.144184  |
| 42               | 1                | 0              | -8.243725               | 1.605538  | 1.185688  |
| 43               | 1                | 0              | -8.066045               | 2.455813  | -0.396194 |
| 44               | 1                | 0              | -9.662606               | 1.822921  | 0.124254  |
| 45               | 8                | 0              | -8.320924               | -2.408956 | -0.453240 |
| 46               | 1                | 0              | -9.256613               | -1.953959 | -0.244781 |
| 47               | 5                | 0              | -0.135492               | 3.227627  | -0.185091 |
| 48               | 9                | 0              | -0.251840               | 4.057256  | -1.337146 |
| 49               | 9                | 0              | -0.255795               | 3.999852  | 1.004731  |
| 50               | 7                | 0              | 10.959415               | -0.489283 | 0.996780  |
| 51               | 8                | 0              | 10.755336               | -1.336809 | -0.018257 |
| 52               | 8                | 0              | 12.058933               | 0.189893  | 1.022764  |
| 53               | 8                | 0              | 10.052096               | -0.375977 | 1.919984  |
| 54               | 7                | 0              | -11.003137              | -0.906235 | 1.004407  |
| 55               | 8                | 0              | -10.674315              | -1.666778 | -0.044395 |
| 56               | 8                | 0              | -12.217155              | -0.471129 | 1.098265  |
| 57               | 8                | 0              | -10.097136              | -0.627548 | 1.894900  |



Optimized geometric parameters for **1e- NO<sub>3</sub><sup>-</sup>** in B3LYP/SDD (solvent phase)

Standard orientation:

| Center<br>Number | Atomic<br>Number | Atomic<br>Type | Coordinates (Angstroms) |           |           |
|------------------|------------------|----------------|-------------------------|-----------|-----------|
|                  |                  |                | X                       | Y         | Z         |
| 1                | 6                | 0              | -7.151720               | -0.102758 | -0.273418 |
| 2                | 6                | 0              | -5.929967               | 0.573408  | -0.210792 |
| 3                | 6                | 0              | -7.176130               | -1.523660 | -0.421884 |
| 4                | 1                | 0              | -5.909541               | 1.653086  | -0.097038 |
| 5                | 6                | 0              | -4.693054               | -0.130146 | -0.295152 |
| 6                | 6                | 0              | -5.949445               | -2.220154 | -0.509092 |
| 7                | 1                | 0              | -5.985713               | -3.299343 | -0.623282 |
| 8                | 6                | 0              | -4.728727               | -1.543166 | -0.447775 |
| 9                | 1                | 0              | -3.807483               | -2.112899 | -0.517563 |
| 10               | 6                | 0              | -3.459719               | 0.633160  | -0.221055 |
| 11               | 1                | 0              | -3.566906               | 1.711866  | -0.110157 |
| 12               | 6                | 0              | -2.176304               | 0.143209  | -0.273597 |
| 13               | 1                | 0              | -1.976363               | -0.918491 | -0.380414 |
| 14               | 6                | 0              | -1.015952               | 0.990177  | -0.187384 |
| 15               | 8                | 0              | -1.219402               | 2.327375  | -0.059971 |
| 16               | 6                | 0              | 0.293331                | 0.478444  | -0.232136 |
| 17               | 1                | 0              | 0.428753                | -0.588870 | -0.335152 |
| 18               | 6                | 0              | 1.410186                | 1.336319  | -0.148991 |
| 19               | 8                | 0              | 1.211390                | 2.674472  | -0.018319 |
| 20               | 6                | 0              | 2.796733                | 0.948546  | -0.188467 |
| 21               | 1                | 0              | 3.493180                | 1.779210  | -0.116332 |
| 22               | 6                | 0              | 3.246299                | -0.347172 | -0.299423 |
| 23               | 1                | 0              | 2.510054                | -1.147826 | -0.363089 |
| 24               | 6                | 0              | 4.625650                | -0.794032 | -0.338685 |
| 25               | 6                | 0              | 5.737853                | 0.098479  | -0.281615 |
| 26               | 6                | 0              | 4.881537                | -2.187743 | -0.438338 |
| 27               | 1                | 0              | 5.568572                | 1.166876  | -0.212175 |
| 28               | 1                | 0              | 4.046760                | -2.882553 | -0.484267 |
| 29               | 6                | 0              | 7.043931                | -0.389758 | -0.319403 |
| 30               | 6                | 0              | 6.190959                | -2.679044 | -0.473516 |
| 31               | 1                | 0              | 6.389244                | -3.743735 | -0.545773 |
| 32               | 6                | 0              | 7.291331                | -1.799548 | -0.411754 |
| 33               | 8                | 0              | 8.195416                | 0.392882  | -0.279106 |
| 34               | 6                | 0              | 8.057042                | 1.846078  | -0.161912 |
| 35               | 1                | 0              | 7.520247                | 2.257891  | -1.025534 |
| 36               | 1                | 0              | 7.536635                | 2.114521  | 0.765847  |
| 37               | 1                | 0              | 9.076996                | 2.232228  | -0.140617 |
| 38               | 8                | 0              | 8.546626                | -2.329044 | -0.449078 |
| 39               | 1                | 0              | 9.362061                | -1.720737 | -0.334909 |
| 40               | 8                | 0              | -8.408237               | 0.497969  | -0.206180 |
| 41               | 6                | 0              | -8.485715               | 1.949896  | -0.034529 |
| 42               | 1                | 0              | -8.006934               | 2.258622  | 0.903130  |
| 43               | 1                | 0              | -8.019705               | 2.469061  | -0.881340 |
| 44               | 1                | 0              | -9.551527               | 2.179980  | 0.000035  |
| 45               | 8                | 0              | -8.332460               | -2.246614 | -0.488642 |
| 46               | 1                | 0              | -9.232028               | -1.776767 | -0.369090 |
| 47               | 5                | 0              | -0.124363               | 3.315609  | 0.070017  |
| 48               | 9                | 0              | -0.243218               | 4.299661  | -0.972429 |
| 49               | 9                | 0              | -0.240280               | 3.991469  | 1.336554  |
| 50               | 7                | 0              | 11.420312               | -0.980916 | 0.851740  |
| 51               | 8                | 0              | 10.877807               | -1.245767 | -0.331343 |
| 52               | 8                | 0              | 12.626917               | -0.506417 | 0.896292  |
| 53               | 8                | 0              | 10.734005               | -1.203719 | 1.934032  |
| 54               | 7                | 0              | -11.411309              | -1.435214 | 0.798408  |
| 55               | 8                | 0              | -10.812990              | -1.538226 | -0.382747 |
| 56               | 8                | 0              | -12.681785              | -1.174497 | 0.838457  |
| 57               | 8                | 0              | -10.714129              | -1.598492 | 1.884479  |

Optimized geometric parameters for **1e- NO<sub>3</sub><sup>-</sup>** in B3LYP/6-311++G\*\* (solvent phase)

Standard orientation:

| Center<br>Number | Atomic<br>Number | Atomic<br>Type | Coordinates (Angstroms) |           |           |
|------------------|------------------|----------------|-------------------------|-----------|-----------|
|                  |                  |                | X                       | Y         | Z         |
| 1                | 6                | 0              | -7.081872               | -0.141650 | -0.212097 |
| 2                | 6                | 0              | -5.870680               | 0.533187  | -0.172656 |
| 3                | 6                | 0              | -7.094304               | -1.556010 | -0.269397 |
| 4                | 1                | 0              | -5.855845               | 1.614499  | -0.130518 |
| 5                | 6                | 0              | -4.639947               | -0.162262 | -0.185433 |
| 6                | 6                | 0              | -5.876891               | -2.245329 | -0.283311 |
| 7                | 1                | 0              | -5.904956               | -3.327745 | -0.327967 |
| 8                | 6                | 0              | -4.669566               | -1.567451 | -0.242007 |
| 9                | 1                | 0              | -3.748694               | -2.136660 | -0.256545 |
| 10               | 6                | 0              | -3.416004               | 0.609204  | -0.141970 |
| 11               | 1                | 0              | -3.541297               | 1.688061  | -0.121696 |
| 12               | 6                | 0              | -2.142408               | 0.138956  | -0.122380 |
| 13               | 1                | 0              | -1.930204               | -0.923137 | -0.133597 |
| 14               | 6                | 0              | -0.992001               | 1.002913  | -0.086782 |
| 15               | 8                | 0              | -1.199573               | 2.305233  | -0.101305 |
| 16               | 6                | 0              | 0.301974                | 0.484393  | -0.060475 |
| 17               | 1                | 0              | 0.434648                | -0.585861 | -0.048681 |
| 18               | 6                | 0              | 1.406283                | 1.341652  | -0.105905 |
| 19               | 8                | 0              | 1.227996                | 2.648386  | -0.113908 |
| 20               | 6                | 0              | 2.785743                | 0.933903  | -0.165073 |
| 21               | 1                | 0              | 3.487723                | 1.759846  | -0.182734 |
| 22               | 6                | 0              | 3.218889                | -0.353555 | -0.192659 |
| 23               | 1                | 0              | 2.479029                | -1.148773 | -0.179195 |
| 24               | 6                | 0              | 4.586138                | -0.819228 | -0.237568 |
| 25               | 6                | 0              | 5.699810                | 0.053776  | -0.257149 |
| 26               | 6                | 0              | 4.824154                | -2.204604 | -0.262199 |
| 27               | 1                | 0              | 5.543663                | 1.122988  | -0.241416 |
| 28               | 1                | 0              | 3.984951                | -2.890633 | -0.248381 |
| 29               | 6                | 0              | 6.990900                | -0.441360 | -0.296724 |
| 30               | 6                | 0              | 6.117299                | -2.706524 | -0.300891 |
| 31               | 1                | 0              | 6.301341                | -3.774062 | -0.317124 |
| 32               | 6                | 0              | 7.215362                | -1.845649 | -0.315923 |
| 33               | 8                | 0              | 8.122663                | 0.311767  | -0.323053 |
| 34               | 6                | 0              | 8.000384                | 1.735890  | -0.290449 |
| 35               | 1                | 0              | 7.447747                | 2.101700  | -1.160416 |
| 36               | 1                | 0              | 7.506313                | 2.065243  | 0.627932  |
| 37               | 1                | 0              | 9.017606                | 2.120191  | -0.316192 |
| 38               | 8                | 0              | 8.446579                | -2.375863 | -0.352789 |
| 39               | 1                | 0              | 9.194532                | -1.725343 | -0.309919 |
| 40               | 8                | 0              | -8.311628               | 0.443110  | -0.203682 |
| 41               | 6                | 0              | -8.392907               | 1.868386  | -0.132677 |
| 42               | 1                | 0              | -7.934280               | 2.242339  | 0.787142  |
| 43               | 1                | 0              | -7.915041               | 2.333100  | -0.999805 |
| 44               | 1                | 0              | -9.454948               | 2.103640  | -0.132409 |
| 45               | 8                | 0              | -8.231494               | -2.270556 | -0.313121 |
| 46               | 1                | 0              | -9.068064               | -1.740383 | -0.293313 |
| 47               | 5                | 0              | -0.101577               | 3.278011  | 0.071608  |
| 48               | 9                | 0              | -0.247140               | 4.294946  | -0.876431 |
| 49               | 9                | 0              | -0.165859               | 3.818190  | 1.367957  |
| 50               | 7                | 0              | 11.446074               | -0.852093 | 0.651634  |
| 51               | 8                | 0              | 10.867123               | -1.223918 | -0.414824 |
| 52               | 8                | 0              | 12.574422               | -0.318173 | 0.581720  |
| 53               | 8                | 0              | 10.883742               | -1.025594 | 1.756051  |
| 54               | 7                | 0              | -11.514072              | -1.296661 | 0.540748  |
| 55               | 8                | 0              | -10.803534              | -1.495686 | -0.491425 |
| 56               | 8                | 0              | -12.713093              | -0.968194 | 0.405738  |
| 57               | 8                | 0              | -11.008888              | -1.432744 | 1.677942  |
